# Supplementary material for: Assessing Chemical Diversity in Psilotum nudum (L.) Beauv., a Pantropical Whisk Fern That Has Lost Many of Its Fern-Like Characters
Source: Front Plant Sci. 2019 Jul 9;10:868. doi: 10.3389/fpls.2019.00868 (PMC6629931; doi:10.3389/fpls.2019.00868)
Supplement: TABLE S2 — Normalized peak areas for GC-MS and HPLC-QTOF-MS data. [file Table_2.XLSX]

## Sheet: SupplTable2_Legend
Supplementary Table 2. Normalized peak areas for GC-MS and HPLC-QTOF-MS data
Abbreviations
R	below-ground rhizome
SB	brown synangium
SG	green synangium
ST	above-ground rhizome
SY	yellow synangium
Note:	We have made an attempt to annotate peaks of unknown identity with a metabolite class.
	These assignments were based on a combination of retention time ans mass spectral properties.
	Please note that additional evidence will be needed for high confidence annotation of these peaks.

## Sheet: GC-MS NORMALIZED
Sample / AMT tag	Metabolite class	SG1	SG2	SG3	SG4	SG5	R1	R2	R3	R4	R5	ST1	ST2	ST3	ST4	ST5	SB1	SB2	SB3	SB4	SB5	SY1	SY2	SY3	SY4	SY5
Sucrose	disaccharide	1018197396	457506795	665295545	655002259	889266898	847471828	515493498	677698039	857541657	1078620177	882757123	674048183	578726569	757001975	826311149	66032332	224580401	181074282	212641329	292222955	386622804	111457664	289773848	428440559	328492766
Glucose1/Mannose2	monosaccharide	21216397	20956560	52324081	23370614	29955532	453224702	78187459	520285526	423139701	148779831	48926929	313454366	315495848	168220491	8128202	10011389	75303504	74344515	56150192	104221549	12840908	4052557	9321076	5165678	3205035
BML-GCMS8-M-38.224-217.2	polyol	4747912	3098184	2612234	3539762	5795812	741257	48743	66384	63814	70750	63635	49705	41952	36731	46895	153853	182367	368245	342056	173812	0	0	0	0	0
Fructose 2	monosaccharide	4726253	3545703	6737658	3709922	4487178	372402753	58366518	393504420	353726255	132808876	5690999	89904459	84118248	43964483	6959835	4351992	24052492	17245693	19106964	29621343	8280095	2437804	6391050	3750766	6547250
Fructose 1	monosaccharide	3985936	3656381	8265401	4386508	5279836	449448383	83601026	463235546	434773897	196603620	7378560	120652297	104826586	57076079	8370580	5785227	27201451	20259429	21371535	32417192	9516238	3014586	7479599	4228287	7416284
Maltose 2	monosaccharide	3198874	1572266	3054043	3145465	4508154	27313136	12498028	26885695	26132482	1048673	1674069	8812951	2928536	8445312	3304353	5474971	15260120	11242455	12231100	37124945	2885618	1092060	3448188	3479780	2930922
Myo-Inositol	sugar alcohol	3096288	1205568	4063092	1970283	2305375	318822	8468764	7663833	11311926	11181754	1292472	3200556	2249969	2530761	1362776	267633	1025790	350746	674654	1375714	257775	103311	262546	340956	255572
BML-GCMS8-M-53.775-357.2	unknown	3038522	1407993	1084834	2807839	3459269
Palmitic Acid	fatty acid	2040231	1663210	638219	490680	435406	2339884	1791423	922751	1420994	1968658	1032928	1234582	1607599	1348786	1846054	2084574	2120026	280513	2136415	2828487	224898	305949	380781	309223	305392
Glucose 2	monosaccharide	1591676	263184	4493235	2383900	3182611	48702065	11333868	56155972	43998994	19535200	4239563	23663422	30153851	11386319	5357756	542437	9366084	7487336	6971977	4152762	1056640	396531	821279	468647	949737
Citric Acid	organic acid	1475939	850045	1927709	1218176	2441065	58615427	58361878	58096750	115885374	104795062	1775027	974004	228301	961860	1412233	345964	14103554	6010368	5150887	5067104	4619889	460711	1051178	1286065	949269
Malic Acid	organic acid	1111086	580403	973620	755862	1104232	58871294	233787360	458227590	475355833	453000987	1493321	3380592	3388337	2995795	2002007	629905	9507266	7145096	9859257	5050895	1841653	512287	1755074	1261725	1771102
β-Sitosterol	sterol	763925	620855	215183	203414	203800	84933	81739	90596	145875	80853	128408	203934	167354	107713	152729	30926	142610	126466	325455	170790	123923	134812	139730	112409	4615
Stearic Acid	fatty acid	702379	667100	223073	190879	212314	1575862	897628	906345	1053445	1439556	334727	877465	1033563	897111	959146	1073267	929794	1205581	884580	775820	105649	138267	204185	143944	161502
Phosphoric Acid	inorganic acid	664968	364944	741547	449409	623784	16038411	4957283	977413	32737092	63296914	1.01522e+06	93584.9	166399	307180	807137	75552	748716	106137	583530	254031	131661	67889.9	133717	258787	216569
BML-GCMS8-M-81.268-289.1	unknown	634904	425561	507900	354157	456038																231261	147841	195822	201355	226367
BML-GCMS8-M-65.561-361.3	unknown	626330	5777143	395883	598927	618251	153399	189761	147677	274483	157333	105345	120653	135834	179550	131911						52840	28319	53456	21338	66496
BML-GCMS8-M-54.271-350.2	unknown	577232	417641	507327	404208	398075	537579	310583	752946	426282	790536	279792	324701	372536	401985	279335	177263	207295	240086	260956	284471
BML-GCMS8-M-40.155-201.1	organic acid	539578	579689	593315	569180	505494	1491539	858848	756891	1090680	994817	198012	139567	157179	150051	161833	0	0	0	0	0	69498	24572	21444	51657	36992
BML-GCMS8-M-84.419-361.3	unknown	462449	253388	499164	414442	671023						40432	48845	39657	37777	37125						1058147	569198	1867440	2368750	1679256
Campesterol	sterol	458960	375415	87359	101828	100978	164246	48923	52257	113258	100199	73963	71139	75000	1398638	524513	21837	126141	21491	58708	127905	61326	12990	78119	53526	1042172
Linoleic Acid	fatty acid	454858	430108	150837	91221	97342	316446	423736	282560	297257	183373	2977656	189365	268185	23858	4344360	52604	33372	48931	52419	11352	26280	31371	35085	35397	27010
BML-GCMS8-M-83.893-361.2	unknown	434334	122340	352135	253136	436512	48405	21709	54386	56555	57378											1908761	1105255	1660687	1868286	1397153
Linolenic Acid	fatty acid	305673	390749	349066	108684	111114	50023	72807	72230	147723	54746	104058	137200	4896	29904	68522						177780	21796	74619	14171	677443
Mannose1/Galactose1	monosaccharide	295991	268685	509388	331886	485589	35973804	9708683	38681306	33570030	115184782	25259683	23849058	27863944	9289975	1604057	8518981	54715515	65109129	38191402	84837679	498605	166913	615017	707763	429957
BML-GCMS8-M-45.874-217.2	polyol	272741	124189	133751	191277	244031	23946	31135	35826	28668	35896
Glycerol	polyol	258851	121121	194143	242811	283777	10946969	6652248	8581369	10236897	4858835	114971	239103	157200	206899	148924	675905	1102612	743501	802245	945702	75735	30540	91921	100949	69203
Sorbitol	polyol	246425	126662	265335	226231	352836	6544444	11675060	3836058	14495580	5043903						22084	115237	151699	139036	87018
BML-GCMS8-M-62.483-361.2	disaccharide	243348	152839	211247	293562	379216	303120	211220	233343	205412	281128	526183	241058	614784	300439	252130						39980	10965	32752	29037	35599
BML-GCMS8-M-47.092-204.1	monosaccharide	241927	421344	595228	244244	532949	35494600	3700788	786442	9643342	10350776	5074832	886921	154424831	2746477	9000352	205029	174462	856232	201180	355415	79623	44148	72832	45816	93967
BML-GCMS8-C-53.959-339.2	unknown	240920	319297	543759	463676	212839						214058	444434	828908	515645	692615						133769	220233	192169	236652	267881
Ribose	monosaccharide	236762	126990	345007	104755	153204	805129	340499	938636	824285	373046	1562	2029	11248	7310	1317	19181	93308	60564	115414	139230	2739	1003	256	504	616
BML-GCMS8-M-76.527-361.2	disaccharide	231697	225434	252222	202741	119823	442523	321339	403979	608102	240749	3086371	1155942	4924408	6207960	4143494	138822	129188	207374	104463	78868	161903	86253	195890	288467	179320
BML-GCMS8-M-64.080-361.2	disaccharide	231238	149530	171231	144668	192399	168712	122011	188411	272033	304581	473473	287515	199628	113690	279437						70922	33470	40226	29353	32667
BML-GCMS8-M-78.075-361.2	disaccharide	221699	113657	153870	208024	241416	607206	169623	479873	3248839	180898	62803	64773	52087	40687	32162	95933	100469	248363	190033	150175	20034	15774	17448	24736	21313
BML-GCMS8-C-37.470-77.1	monosaccharide	176914	161047	195695	164413	155717	290792	1413240	858935	1282037	1984266	106974	104253	109771	122672	108662	445482	726554	972398	855431	633211	22436	14788	26495	21195	21021
BML-GCMS8-M-78.388-361.2	disaccharide	149345	111239	112237	82538	96889	33476	33954	46824	54580	44368						25583	29745	67739	57978	43923	49275	13552	33368	17724	23619
BML-GCMS8-M-38.870-147.1	monosaccharide	136066	83498	113566	96887	190054	3676897	1294307	2835973	3075634	2166574	495071	588872	968671	506490	741275	41005	55537	60674	50772	34527	82538	79855	70153	93026	100812
BML-GCMS8-C-14.524-147.1	unknown	129121	125583	242853	223160	185600	309264	150131	206909	202408	210344	55695	28789	53322	41837	187470	200732	240664	358501	231584	176486	41157	64398	39812	53756	104406
BML-GCMS8-C-34.982-280.4	unknown	122501	143890	143034	141771	146437	665813	154514	301915	181010	346674	117928	100724	120889	105818	137617	120806	109513	189078	162618	102735	66850	72177	76983	59585	94642
BML-GCMS8-M-56.824-305.1	unknown	112731	212527	170872	213067	169662	317344	255912	260855	439715	458019	159977	240719	261758	184762	158247	130152	146579	379995	231204	303114
BML-GCMS8-M-82.239-361.2	unknown	108331	175860	324243	543989	585972	1092241	504263	890636	610816	109984	785596	1022517	551691	1024754	545292	135792	58110	385616	320224	277949	189961	86767	251806	240434	215761
BML-GCMS8-M-48.961-194.1	phenolic compound	104792	932239	1544027	932284	1328942	416855	700507	623397	485930	512562	150396	170301	128794	158307	175068
BML-GCMS8-M-11.238-147.1	organic acid	88592	40574	64417	44278	86289	637185	882300	649288	598454	542786	45242	100758	93666	138753	35974	198737	188395	301232	377922	386422	38351	10437	4252	54191	30841
BML-GCMS8-M-68.950-361.2	disaccharide	82164	85272	111573	118292	165500	3779651	1411019	2582320	2941513	1802943	282912	1393171	823522	860119	479875	227260	108251	611126	409400	232264	253205	92813	299612	316949	295226
BML-GCMS8-M-66.209-361.2	disaccharide	76855	84238	92802	154919	219430	1909475	1216745	1073439	2397973	2392584	87901	30438	114522	28959	124827	52477	73415	63143	71437	87511	342708	124068	400134	324270	343649
BML-GCMS8-M-80.048-289.1	disaccharide	75776	66859	41093	59723	475913																24471	18507	28781	24750	19522
BML-GCMS8-M-73.145-204.1	disaccharide	69820	76661	80331	67453	95022	988453	1632380	877649	1257448	591594	204439	761744	829350	285161	294179						33087	28138	48134	41652	44441
BML-GCMS8-M-51.109-319.1	monosaccharide	64000	67140	66695	75191	96579	528614	186959	577743	549455	380359	70409	77133	56081	73474	58854	26993	38979	47203	46538	34692	16626	24799	18653	24740	39221
BML-GCMS8-M-39.706-392.1	unknown	61941	29583	28219	45465	62747	69530	27969	116880	59458	113738						10612	14433	22634	16908	10568	35137	16468	43828	32235	18445
BML-GCMS8-M-70.461-361.2	unknown	59449	29888	93576	14560	240583	3286657	1944799	2316779	4261241	4216429	189886	331886	466690	339916	358115	104766	175976	1493441	104171	391853	535989	187288	646023	562304	644854
BML-GCMS8-M-51.781-334.2	unknown	59240	38593	44393	44360	57920	243911	139840	138461	329586	125114	22369	28803	47155	25904	34733
BML-GCMS8-M-39.706-392.1	unknown	56285	37539	72168	46111	71267	208035	241736	257108	618078	226078	79351	56388	72441	66622	50929	33936	38375	452939	302750	88623	7287	18745	47891	87105	31036
BML-GCMS8-M-42.568-217.1	monosaccharide	56017	20258	24522	21510	50515	102746	110715	83051	102147	145841	68433	83782	68767	85094	79824	0	0	0	0	0	0	0	0	0	0
BML-GCMS8-M-63.773-361.2	unknown	52011	35612	45233	45157	66433	90736	75663	92884	106273	80660						111182	104221	295271	255467	159709	135959	117639	264927	255596	122457
BML-GCMS8-M-41.197-217.1	unknown	47289	37557	47544	33330	48776	234727	179940	380530	135210	364478	141824	216149	150857	160829	355584	20025	20682	43445	44648	21352	56642	26461	67350	50784	49919
BML-GCMS8-M-64.854-361.2	disaccharide	40783	31424	38772	37883	38439						23726	36441	32936	36825	37130						2322	2051	3929	4396	3824
BML-GCMS8-C-19.877-174.2	unknown	37337	39365	51929	22074	53508	221562	80564	82419	77851	125943	68093	23329	38008	38821	60038	79710	81661	96449	58135	59597	22555	30111	49606	28142	47397
BML-GCMS8-C-38.489-296.4	unknown	34325	35693	54397	37072	45852	254477	174553	181491	36398	81864	32798	34134	40258	30820	46893	54130	93974	99057	80934	122699	21337	25161	21327	20967	23605
BML-GCMS8-C-48.154-344.5	unknown	31176	39262	57479	57017	65883	401404	62079	103237	133055	122269	45309	40049	46749	42939	57809	55970	57984	70790	37947	43200	20281	24359	34628	1966	29629
BML-GCMS8-M-68.856-319.2	unknown	25579	17483	22866	15641	30127	222596	182038	363529	173600	252976	105864	119092	322695	64782	124909	184056	158029	488440	487505	522765
Succinic Acid	organic acid	24757	6535	6232	9427	19544	3040379	2347367	2637222	1317774	1697805	4758	7034	1122	8609	8754	17301	388242	169081	401789	249213	11743	4401	9079	19732	1209
BML-GCMS8-M-61.891-361.2	unknown	24750	27706	78060	55973	90346	986568	883219	1400227	1682069	927729	102921	484104	134625	370384	185561	59969	56193	89550	65035	49633	111802	27512	125002	174360	73246
Malonic Acid	organic acid	19715.9	11704.1	26781.9	14582.3	24967.3	1.82937e+06	1.43775e+06	1.47801e+06	1.40991e+06	1.41018e+06	13558.2	74519	51383.8	54674.3	23392.6	17654.5	154325	22180	122677	80464.3	15124.8	6989.87	25755.8	19047.9	18766.3
BML-GCMS8-M-30.422-156.1	amino acid derivative	14368	55827	72271	73000	109016	1371808	1002177	1676677	3602572	2124079	349487	320212	456280	216088	367208	0	0	0	0	0	0	0	0	0	0
BML-GCMS8-M-10.172-152.1	unknown	8531	5603	6269	5587	7212	326539	142317	202291	117172	230852	29359	15188	22109	12612	22093	110224	90084	172628	139021	102843
Galactose 2	monosaccharide	8349	2667	36219	29470	21889	5554674	2183737	5540722	6324178	3496155	1244199	2365121	233935	1245690	2668226	481226	3281103	4195819	2445151	5227483	105582	17561	154341	103124	92207
Glycine	amino acid	5566	6578	14123	7259	16349	0	0	0	0	0	17176	19357	25332	4066	18220	0	0	0	0	0	0	0	0	0	0
4-Aminobutyric Acid	organic acid	4933	3926	4703	2737	11948	6865868	4268898	3127510	4928262	3756640	309895	315884	256153	252497	230857	0	0	0	0	0	14906	5615	15539	24053	24200
BML-GCMS8-M-29.681-84.1	unknown	4070	1897	1519	2142	2470	67142	39107	28275	41485	10273	31036	31941	35373	20401	26803
BML-GCMS8-M-29.681-84.1	unknown	4070	1897	1519	2142	2470
Threonine	amino acid	3437	1685	3568	1268	4869	0	0	0	0	0	3167	3434	3819	644	4992	0	0	0	0	0	0	0	0	0	0
BML-GCMS8-M-26.684-160.1	unknown	3055	2257	1429	2908	2173	379770	463281	288448	349617	343284	146411	118178	70031	77207	151884	0	0	0	0	0	0	0	0	0	0
Serine 1	amino acid	1976.91	1971.27	3470.83	3759.26	8134.59	0	0	0	0	0	6086.69	7674.6	9075.23	4662.67	6505.94	0	0	0	0	0	0	0	0	0	0
Glyceric Acid	organic acid	1469	1483	2607	1433	2772	1192076	940415	393616	1402283	1433849	26229	40144	19402	40745	26927	0	0	0	0	0	0	0	0	0	0
Isocitric Acid	organic acid	650	10396	13233	14079	23914	611305	298565	455836	778790	706768	6808	1850	4486	3745	6395	26077	104922	93030	175661	10214	17167	8330	22280	22121	17666
Glutamic Acid 1	amino acid	363	2775	489	758	1268	0	0	0	0	0	22478	20472	470	12669	14262	0	0	0	0	0	0	0	0	0	0
Xylose 2	monosaccharide	179	3487	8077	2485	2637	314958	40826	267434	110270	251117	1315	5189	3266	2605	949	12768	89310	33337	54385	70051	581	55	519	516	88
Maltose 1	disaccharide	0					4083734	3071083	4496595	2526537	6647110	209417	545971	1232182	212717	244663
BML-GCMS8-M-79.649-361.2	disaccharide	0					402721889	150991795	335266024	323696166	192181873	2790279	2765681	1728207	20966725	1943159	61182536	71969564	84014826	93260123	77211263
BML-GCMS8-M-66.784-361.2	disaccharide	0					48761	29157	29618	46841	22175	26621	25623	20450	27751	29595	16258	20381	23940	29360	17078
α-Ketoglutaric acid	organic acid	0	0	0	0	0	2731527	1340978	1874119	554962	93192	84188	36623	50964	13879	85141	0	0	0	0	0	0	0	0	0	0
Fumaric Acid	organic acid	0	0	0	0	0	231551	371007	52556	84740	150429	0	0	0	0	0	0	0	0	0	0	0	0	0	0	0
Phytol 2	terpenoid	0										111876	101630	180273	90857	88655
Raffinose	trisaccharide	0	107412	660276	334758	348510	101979665	67952076	71549089	190908122	175601536	898603	264252004	8968749	114932951	48707691	5949830	5349199	2338156	3728038	17420626	1491464	262408	937921	1609320	1417601
BML-GCMS8-M-8.562-175.2	unknown	0	0	0	0	0	56635	48502	62263	65324	76492	0	0	0	0	0	0	0	0	0	0	0	0	0	0	0
BML-GCMS8-M-8.324-77.1	unknown	0	0	0	0	0	62002	44078	37294	49725	54825	0	0	0	0	0	0	0	0	0	0	0	0	0	0	0
BML-GCMS8-M-78.520-361.2	unknown	0					383915	211788	413450	268674	456860	180361	215333	152677	212743	219618	40517	27989	69892	26376	56877	70928	46652	64672	50561	45524
BML-GCMS8-M-76.092-361.2	unknown	0					2941349	325101	2065870	333621	970922	275308	2800618	299433	425095	146143	242259	1331628	3015397	1636233	1205168	1598711	549229	2869154	718343	2840713
BML-GCMS8-M-74.366-361.2	unknown	0															25600	31727	76792	44716	39917	127736	149155	273320	163095	109269
BML-GCMS8-M-70.893-281.1	unknown	0										283464	393266	274177	293180	166258
BML-GCMS8-M-61.775-217.1	unknown	0										232084	145332	146806	177705	155298
BML-GCMS8-M-56.985-204.2	unknown	0					757974	256769	777467	1038577	362463	4966547	17211521	8334195	13151526	7963700	103681	142552	1082071	393663	219667
BML-GCMS8-M-56.644-348.1	unknown	0										252546	187198	224136	221834	180685	1854883	1216891	2410019	2747735	1242049
BML-GCMS8-M-56.372-205.2	unknown	0										458296	340511	488688	229332	282619	53371	56275	77351	41255	53496	2484	1679	3214	1626	1930
BML-GCMS8-M-50.533-217.2	unknown	0										59410	45936	39890	27752	45739
BML-GCMS8-M-45.489-275.1	unknown	0	0	0	0	0	616592	151321	350564	589574	497205	161489	123138	113932	154077	166115	0	0	0	0	0	0	0	0	0	0
BML-GCMS8-M-45.339-319.2	unknown	0	0	0	0	0	4500512	5477970	5059166	5247879	6397846	0	0	0	0	0	0	0	0	0	0	0	0	0	0	0
BML-GCMS8-M-41.461-217.2	unknown	0					634808	669707	654624	731312	990662	798242	288200	215039	524892	559489	44892	50077	52937	79532	71181	144454	96726	196388	151050	151652
BML-GCMS8-M-41.141-333.2	unknown	0	0	0	0	0	0	0	0	0	0	0	0	0	0	0	0	0	0	0	0	65723	27141	81952	87207	62203
BML-GCMS8-M-38.017-117.2	unknown	0
BML-GCMS8-M-33.608-159.1	unknown	0	0	0	0	0	0	0	0	0	0	1103058	192868	294437	103682	747607	0	0	0	0	0	0	0	0	0	0
BML-GCMS8-M-33.280-289.1	unknown	0	0	0	0	0	0	0	0	0	0	316257	235923	761268	258824	141199	0	0	0	0	0	0	0	0	0	0
BML-GCMS8-M-32.854-198.1	unknown	0	0	0	0	0	535363	174246	263513	76015	138627	0	0	0	0	0	0	0	0	0	0	0	0	0	0	0
BML-GCMS8-M-32.422-292.1	unknown	0	0	0	0	0	2512129	1425653	1634926	2724862	2864701	155586	37496	56484	37176	81017	0	0	0	0	0	0	0	0	0	0
BML-GCMS8-M-30.626-217.3	unknown	0	0	0	0	0	0	0	0	0	0	211848	184502	201021	151950	140324	0	0	0	0	0	0	0	0	0	0
BML-GCMS8-C-85.689-596.5	unknown	0					420894	684430	597424	304992	228518	3862	6216	44390	13088	123511	1586070	1291746	913308	1940768	1715119
BML-GCMS8-C-82.710-580.4	unknown	0					1520567	1452440	1016835	1677549	2378156	25232	38872	126576	18344	260432	3879007	4239390	3113391	5949567	4859506
BML-GCMS8-C-81.919-457.2	unknown	0					46129	66974	44523	51981	66379	13242	13796	17187	16154	26274	809387	559307	560272	786517	693924
BML-GCMS8-C-80.357-495.6	unknown	0
BML-GCMS8-C-75.228-425.4	unknown	0					45050	269992	117384	217783	196344	22085	13237	28663	29860	10941	483394	531038	278733	624693	548102
BML-GCMS8-C-74.186-327.4	unknown	0										95743	180337	154969	188356	101325
BML-GCMS8-C-73.586-454.3	unknown	0					650453	2592457	1767019	1519134	3793687						1639921	1223685	1294666	2705019	2204273
BML-GCMS8-C-70.994-397.2	unknown	0					137156	130762	82176	119109	124829	22126	14681	21176	28834	37358	351692	572985	136353	458922	571316	13799	28109	21650	12541	45104
BML-GCMS8-C-69.911-292.1	unknown	0										28151	13300	27874	26283	28415	539925	282185	442130	458583	587590
BML-GCMS8-C-63.855-371.4	unknown	0										10445	5618	8962	6418	8098	61535	67655	93886	62911	53714
BML-GCMS8-C-61.428-348.4	unknown	0					42374	50743	32434	56572	37993
BML-GCMS8-C-36.912-57.2	unknown	0															42407	44314	68664	53924	59091
BML-GCMS8-C-31.228-218.2	unknown	0										52391	70110	96878	97638	66466
BML-GCMS8-C-14.849-174.2	unknown	0	0	0	0	0	0	0	0	0	0	63316	33112	65185	38552	58189	0	0	0	0	0	0	0	0	0	0

## Sheet: LC-MS NORMALIZED
Sample / AMT tag	Metabolite class	SG1	SG2	SG3	SG4	SG5	R1	R2	R3	R4	R5	ST1	ST2	ST3	ST4	ST5	SB1	SB2	SB3	SB4	SB5	SY1	SY2	SY3	SY4	SY5
BML-LCMS18-29.07-546.3199	C31H46O8; triterpenoid	1.36184e+08	1.28432e+08	1.33909e+08	1.37801e+08	1.24078e+08	837845	2.39173e+06	1.0944e+06	780492	1.56707e+06	743758	3.71501e+06	1.06006e+06	1.72659e+06	771820	5.26296e+07	8.70569e+07	8.67792e+07	7.02263e+07	7.26024e+07	1.3915e+08	1.22633e+08	1.53509e+08	1.18098e+08	1.24181e+08
BML-LCMS18-29.99-548.335	C31H48O8; triterpenoid	4.95447e+07	4.58359e+07	4.65957e+07	4.63838e+07	4.58876e+07	137042	339580	157762	149567	216799	121240	306552	126018	237104	129826	1.39849e+07	2.01718e+07	1.73372e+07	1.92403e+07	1.8085e+07	4.35624e+07	3.86554e+07	4.88745e+07	4.16366e+07	4.24637e+07
BML-LCMS18-29.47-522.3191	C29H46O8; triterpenoid	4.86874e+07	4.667e+07	4.97892e+07	5.10384e+07	5.0361e+07	179398	521837	254469	173400	362805	108990	549897	254309	394601	181991	1.35818e+07	2.5926e+07	2.37873e+07	2.26305e+07	2.39923e+07	4.68759e+07	4.11508e+07	5.40064e+07	4.2088e+07	4.58024e+07
BML-LCMS18-28.97-528.3094	C34H42NO4; possibly alkaloid	4.43312e+07	4.20162e+07	4.36678e+07	4.60201e+07	3.95096e+07	192905	577137	267691	185199	368794	174061	1.00123e+06	264592	425793	189716	1.99638e+07	3.54066e+07	3.55092e+07	2.8387e+07	2.95062e+07	4.84037e+07	4.30116e+07	5.309e+07	4.07032e+07	4.44651e+07
BML-LCMS18-28.4-446.2667	C26H38O6; triterpenoid	3.74633e+07	3.63439e+07	4.01893e+07	3.46603e+07	3.6386e+07	61850.4	167773	77551.9	53631	107873	66733.1	531229	125573	196778	79891	9.69417e+06	1.73173e+07	1.63462e+07	1.3712e+07	1.4167e+07	2.11969e+07	1.90413e+07	2.41849e+07	1.95152e+07	2.01896e+07
BML-LCMS18-30.05-548.3359	C31H48O8; triterpenoid	3.66077e+07	3.38722e+07	3.44146e+07	3.43252e+07	3.38123e+07	107644	263421	136641	127808	170002	169465	278717	136924	265250	157967	1.08613e+07	1.54265e+07	1.32253e+07	1.47612e+07	1.39118e+07	3.25413e+07	2.86524e+07	3.6129e+07	3.07237e+07	3.13695e+07
BML-LCMS18-29.67-522.3193	C29H46O8; triterpenoid	3.19097e+07	2.75902e+07	2.95012e+07	3.39659e+07	2.87378e+07	356261	871988	423855	340539	606978	216967	576983	271481	581147	314125	2.42141e+07	1.91834e+07	1.53987e+07	2.28999e+07	2.24925e+07	3.26887e+07	2.86414e+07	3.39845e+07	2.97833e+07	3.04796e+07
BML-LCMS18-29.47-504.3091	C29H44O7; triterpenoid	2.80745e+07	2.67103e+07	2.85493e+07	2.94489e+07	2.86923e+07	60696.2	172382	81356.6	61696.5	119687	47308.7	214278	93502.6	162824	77031.7	7.56567e+06	1.52774e+07	1.35996e+07	1.33869e+07	1.38482e+07	2.64994e+07	2.34328e+07	2.98675e+07	2.38947e+07	2.50637e+07
Psilotinin	arylpyrone	2.65576e+07	2.53217e+07	2.86143e+07	3.02906e+07	2.31773e+07	1.47992e+07	2.45762e+07	2.07925e+07	1.34818e+07	1.57582e+07	4.91318e+07	3.74202e+07	2.91244e+07	2.00216e+07	1.39628e+07	7.73241e+06	7.72293e+06	1.11122e+07	1.51501e+07	1.63961e+07	2.02218e+06	1.40029e+06	1.97145e+06	1.09907e+06	1.76744e+06
BML-LCMS18-32.61-432.2872	C31H48O8; triterpenoid	2.60391e+07	2.55934e+07	2.49561e+07	2.59437e+07	2.93137e+07	42390.3	105337	54235.6	34919.7	56443.6	45161.2	622915	129752	104109	61676.9	7.5498e+06	1.08509e+07	1.08297e+07	1.0354e+07	1.08647e+07	1.31642e+07	1.09891e+07	1.52619e+07	1.13795e+07	1.14493e+07
BML-LCMS18-29.1-568.3015	C34H42N3O7; possibly alkaloid	2.4878e+07	2.42502e+07	2.42781e+07	2.63487e+07	2.29234e+07	296468	753954	336255	261793	492658	240907	898878	273093	447224	203642	1.26678e+07	1.58559e+07	1.5882e+07	1.43307e+07	1.48522e+07	2.57123e+07	2.36625e+07	3.08917e+07	2.40436e+07	2.45888e+07
BML-LCMS18-29.94-530.322	C31H46O7; triterpenoid	2.47193e+07	2.28815e+07	2.31916e+07	2.27176e+07	2.30003e+07	40947.8	99587.9	49293	44539.4	69118.1	31219.7	105338	36123.9	76975.6	45740.1	5.0713e+06	8.65432e+06	7.19901e+06	7.85759e+06	7.19047e+06	1.97895e+07	1.77888e+07	2.27956e+07	1.96286e+07	1.9788e+07
BML-LCMS18-33.04-458.3029	C28H42O5; triterpenoid	2.28354e+07	2.26483e+07	1.99859e+07	1.89382e+07	2.27645e+07	15809.3	28680	19201.1	8096.51	18275.7	14002.4	310210	45186.6	28397.9	15819.7	3.32096e+06	6.42974e+06	5.9432e+06	4.99514e+06	4.78358e+06	7.27671e+06	6.35188e+06	9.54952e+06	6.69889e+06	6.26648e+06
Psilotin	arylpyrone glycoside	1.63632e+07	1.58691e+07	1.71719e+07	1.75004e+07	1.69919e+07	3.0755e+07	3.49171e+07	3.46475e+07	3.41174e+07	3.2292e+07	3.07883e+07	3.79758e+07	3.10957e+07	3.54283e+07	3.69943e+07	9.37613e+06	1.12299e+07	1.38329e+07	1.14673e+07	1.49331e+07	1.8886e+07	1.71715e+07	2.24388e+07	1.67945e+07	1.85581e+07
BML-LCMS18-17.02-678.5037	possibly background ion	1.47056e+07	5.29583e+06	842320	517632	400497	1574.13	2057.23	1822.01	1.70986e+07	2.52873e+06	1.63625e+07	5.21472e+06	923033	582468	391384	1.59281e+07	1.8034e+06	1.58276e+07	3.82065e+06	1.95428e+06	3.94331e+06	1.39304e+06	838153	414413	334843
Amentoflavone	biflavonoid	1.3694e+07	9.04476e+06	8.44899e+06	8.71717e+06	8.48954e+06	3.62398e+06	2.99946e+06	2.93885e+06	2.2103e+06	2.59302e+06	7.54212e+06	1.23868e+07	1.19882e+07	1.17295e+07	1.24308e+07	1.21169e+07	1.31447e+07	1.23793e+07	1.25147e+07	1.44839e+07	1.41305e+07	1.28254e+07	1.60303e+07	1.25473e+07	1.36468e+07
BML-LCMS18-28.96-528.3082	C34H42NO4; possibly alkaloid	1.3553e+07	1.44232e+07	1.52841e+07	1.47113e+07	1.50852e+07	136781	451156	205641	136423	295146	126474	909331	228929	373114	159780	1.16987e+07	2.82439e+07	3.00582e+07	2.16541e+07	2.37659e+07	4.28275e+07	3.9912e+07	4.51736e+07	3.16269e+07	3.63232e+07
3'-Hydroxypsilotin	arylpyrone glycoside	1.31394e+07	1.30293e+07	1.40364e+07	1.42883e+07	1.35839e+07	2.50661e+06	2.99429e+06	2.30354e+06	2.07174e+06	3.45758e+06	1.98017e+06	3.34166e+06	2.67517e+06	2.35449e+06	2.26061e+06	1.13114e+07	1.76589e+07	1.9645e+07	1.43726e+07	2.06944e+07	1.72002e+07	1.5321e+07	1.90195e+07	1.42299e+07	1.47746e+07
BML-LCMS18-28.39-194.0579	unknown	1.2697e+07	1.22619e+07	1.39986e+07	1.25668e+07	1.28585e+07	0	0	0	0	0	0	64185.3	9303.92	16809.7	0	2.09641e+06	4.32684e+06	4.01087e+06	2.37029e+06	2.71638e+06	4.49522e+06	4.15419e+06	5.87034e+06	4.99543e+06	4.67901e+06
BML-LCMS18-28.91-528.5058	unknown	9.69823e+06	9.08141e+06	9.302e+06	9.04533e+06	8.97735e+06	0	0	0	0	0	0	0	0	0	0	1.14482e+06	2.97338e+06	2.70974e+06	2.02256e+06	1.93687e+06	6.71452e+06	5.9239e+06	8.088e+06	6.25546e+06	6.26557e+06
BML-LCMS18-17.92-769.6051	unknown	8.79386e+06	3.32406e+06	650935	418143	333885	1986.09	1919.46	1754.38	1.0115e+07	1.58719e+06	1.0372e+07	3.56399e+06	715914	425325	295936	9.22388e+06	1.04285e+06	8.93138e+06	2.15275e+06	1.07811e+06	2.64893e+06	940419	527051	271759	223130
3'-Hydroxypsilotinin	arylpyrone	8.62871e+06	1.2286e+07	1.50172e+07	1.23162e+07	1.70784e+07	1.02414e+06	1.52146e+06	1.53912e+06	975230	984195	3.06637e+06	6.221e+06	5.44948e+06	765357	541229	971020	570807	1.88059e+06	2.4259e+06	2.86524e+06	0	0	0	0	0
BML-LCMS18-27.98-448.2822	C26H40O6; functionalized diterpenoid	8.47917e+06	8.41343e+06	9.5787e+06	7.27759e+06	9.78028e+06	11474.4	21457.9	14272.3	9624.6	16803.1	14824.2	90226	21448.8	28312.1	11398.4	6.34011e+06	1.1338e+07	1.00318e+07	8.99097e+06	8.71799e+06	4.60388e+06	3.58645e+06	3.95945e+06	3.72109e+06	3.76134e+06
BML-LCMS18-5.12-296.1492	unknown	8.06363e+06	7.81977e+06	8.64027e+06	8.81058e+06	8.19553e+06	1.3988e+07	1.56904e+07	1.55676e+07	1.54276e+07	1.47502e+07	1.32907e+07	1.69328e+07	1.53908e+07	1.96758e+07	2.04645e+07	4.92608e+06	5.50531e+06	6.78798e+06	5.91402e+06	7.3693e+06	8.58104e+06	7.56281e+06	1.03192e+07	7.64706e+06	8.49094e+06
BML-LCMS18-27.44-448.2825	C26H40O6; functionalized diterpenoid	7.7399e+06	7.43298e+06	7.78584e+06	6.77285e+06	7.52143e+06	14394.1	28866.2	17851.2	12931.7	17342.1	15290.8	53754.6	17585	29154.1	17853.3	1.9643e+06	3.16096e+06	2.83725e+06	2.90871e+06	2.80873e+06	5.14718e+06	4.399e+06	5.58766e+06	4.90204e+06	4.8367e+06
BML-LCMS18-32.14-460.319	C28H44O5; triterpenoid	7.24858e+06	6.938e+06	6.56668e+06	6.54905e+06	7.08598e+06	7771.89	28516.9	10796.6	11577.6	21538.8	11740.6	60829.1	12975	23998.7	17291.6	2.5174e+06	3.19322e+06	2.82155e+06	3.35715e+06	3.15885e+06	6.34638e+06	5.61679e+06	7.03128e+06	5.81899e+06	5.89992e+06
BML-LCMS18-5.2-726.2151	unknown	6.98733e+06	6.80708e+06	7.33728e+06	7.67672e+06	7.16025e+06	1.57697e+07	1.78524e+07	1.79776e+07	1.76902e+07	1.63792e+07	1.65605e+07	2.06149e+07	1.64219e+07	1.84001e+07	1.91926e+07	3.63999e+06	4.37678e+06	5.53104e+06	4.51409e+06	5.92116e+06	8.83752e+06	7.79207e+06	1.02866e+07	7.4081e+06	8.16877e+06
BML-LCMS18-15.78-565.4194	C30H55N5O5; cyclic peptide?	6.88573e+06	2.26156e+06	323435	194743	144192	1445.67	2400.36	1826.46	7.69853e+06	911405	8.0694e+06	2.05644e+06	355875	235570	154597	7.03794e+06	653964	7.20126e+06	1.47147e+06	745534	1.54338e+06	579521	381804	187233	147443
BML-LCMS18-28.4-463.2924	C26H38O6; functionalized diterpenoid	6.77573e+06	6.548e+06	7.27257e+06	5.83602e+06	6.48289e+06	3699.94	8249.87	4474.43	3892.91	5663.53	8011.88	43172.7	9164.35	13947.5	6759.6	1.05295e+06	2.31581e+06	1.90536e+06	1.70834e+06	1.63353e+06	2.81859e+06	2.4729e+06	3.15495e+06	2.5976e+06	2.60372e+06
BML-LCMS18-26.2-560.2989	C31H44O9; triterpenoid	6.64227e+06	5.29193e+06	5.93723e+06	7.67096e+06	5.27504e+06	78975.7	203568	76530.5	78259.9	164051	21526.1	36016.8	27237.2	100582	58083.6	8.93066e+06	1.24937e+07	8.33126e+06	1.42389e+07	1.40237e+07	1.75626e+07	1.68899e+07	1.7763e+07	1.89362e+07	1.90904e+07
BML-LCMS18-26.51-450.2982	C26H40O6; functionalized diterpenoid	6.3314e+06	5.67491e+06	5.77061e+06	5.64587e+06	5.57801e+06	31484.1	83731.6	37378.3	35262.4	61210.5	95300	255342	243155	241735	135512	2.2958e+06	2.7502e+06	2.39013e+06	2.88996e+06	2.83407e+06	5.37769e+06	4.79899e+06	6.20709e+06	5.13746e+06	5.27245e+06
BML-LCMS18-5.09-742.2083	unknown	6.32501e+06	6.28026e+06	6.79342e+06	7.38445e+06	7.15888e+06	3.99227e+06	4.61058e+06	3.7454e+06	3.3163e+06	4.99709e+06	2.94238e+06	4.77499e+06	3.83463e+06	3.28041e+06	3.16948e+06	5.42379e+06	6.83032e+06	8.0072e+06	6.78056e+06	8.42509e+06	8.80952e+06	7.22201e+06	9.79487e+06	6.98456e+06	7.35569e+06
BML-LCMS18-5.06-742.2089	unknown	6.31274e+06	6.28944e+06	6.80148e+06	7.43755e+06	7.16297e+06	2.73985e+06	2.8798e+06	2.4637e+06	2.27759e+06	2.97816e+06	1.11788e+06	2.87863e+06	3.83303e+06	2.23023e+06	1.9522e+06	3.48408e+06	2.52442e+06	2.93131e+06	2.4035e+06	3.13768e+06	8.83053e+06	7.2451e+06	9.80966e+06	6.98266e+06	7.35613e+06
BML-LCMS18-30.37-626.3462	C36H50O9; no matches in metabolite databases	6.29521e+06	5.92153e+06	6.0185e+06	5.65903e+06	5.94159e+06	31251.5	69631.6	39038.9	32307.1	43005.9	30181.8	60968.1	33110.6	31021.4	27714.3	3.15084e+06	3.76826e+06	3.6899e+06	3.54385e+06	3.58465e+06	5.00984e+06	4.58916e+06	5.4845e+06	4.73531e+06	4.67311e+06
BML-LCMS18-10.99-682.2477	C32H42O16; phenolic glycoside	5.89947e+06	5.51401e+06	6.08954e+06	6.38618e+06	5.7435e+06	293792	447227	319470	231873	436048	194491	503529	440156	368100	247928	2.84951e+06	4.09464e+06	4.16439e+06	3.51444e+06	4.42064e+06	6.13161e+06	5.64879e+06	7.11241e+06	5.76494e+06	5.73082e+06
BML-LCMS18-29.57-276.208	C18H28O2; diterpenoid?	5.58682e+06	5.88047e+06	6.26078e+06	5.18784e+06	6.54995e+06	1.03903e+07	1.27613e+07	1.56599e+07	1.17881e+07	1.53093e+07	9.93655e+06	1.49489e+07	8.36929e+06	5.38359e+06	3.15778e+06	555973	660647	692589	293212	637595	5.10429e+06	4.48749e+06	4.69853e+06	3.77476e+06	4.99343e+06
BML-LCMS18-30.36-474.2988	C26H42O5; no matches in metabolite databases	5.12114e+06	5.32643e+06	6.17581e+06	4.50064e+06	5.40898e+06	0	0	0	0	0	0	0	0	0	0	984540	2.32974e+06	1.85619e+06	1.55117e+06	1.6428e+06	1.73274e+06	1.57409e+06	2.13879e+06	1.6928e+06	1.74178e+06
2,3-Dihydroamentoflavone	biflavonoid	4.91889e+06	5.31542e+06	5.98072e+06	5.91849e+06	5.73974e+06	1.69532e+06	1.33401e+06	1.60994e+06	1.14953e+06	1.11941e+06	2.94881e+06	5.61796e+06	5.59717e+06	5.77768e+06	6.48282e+06	5.40479e+06	6.60925e+06	6.42209e+06	6.27391e+06	7.99574e+06	6.88878e+06	6.56226e+06	7.76164e+06	6.25077e+06	6.79868e+06
Binaringenin	biflavonoid	4.55046e+06	4.85643e+06	5.35982e+06	5.30195e+06	5.18976e+06	499922	374924	545870	438708	346008	634321	1.1961e+06	1.049e+06	903227	1.03465e+06	4.09653e+06	5.81531e+06	6.67754e+06	5.83824e+06	7.43752e+06	8.02237e+06	7.94391e+06	8.34584e+06	7.08127e+06	7.7458e+06
BML-LCMS18-31.68-434.3033	C26H42O5; no matches in metabolite databases	4.3249e+06	3.83855e+06	4.06557e+06	5.01558e+06	4.89204e+06	17637	53691.1	21597.2	29258.4	31846.3	22128.7	72342.3	23452.6	47648.7	25602.4	3.19751e+06	3.02031e+06	2.75785e+06	3.92179e+06	3.86146e+06	6.36503e+06	5.39289e+06	6.52411e+06	5.73602e+06	6.22405e+06
BML-LCMS18-10.99-699.2495	unknown	4.17485e+06	3.67134e+06	4.00205e+06	4.16308e+06	3.67763e+06	226388	267388	271052	293643	236168	62030.2	172635	157306	119406	73270.3	1.21992e+06	1.98168e+06	1.85854e+06	1.52839e+06	2.01069e+06	3.54244e+06	3.45734e+06	3.97931e+06	3.53064e+06	3.25323e+06
BML-LCMS18-29.57-294.201	unknown	4.16749e+06	4.31793e+06	4.64863e+06	3.81501e+06	5.04165e+06	8.69911e+06	1.08119e+07	1.3042e+07	9.98976e+06	1.28631e+07	4.47416e+06	8.73534e+06	4.74068e+06	2.78663e+06	1.03679e+06	426583	526824	511853	230047	486222	4.4421e+06	3.92255e+06	4.11299e+06	3.31553e+06	4.39326e+06
BML-LCMS18-17.92.791.5865	unknown	4.07313e+06	1.4012e+06	191050	128054	104334	1705.61	1626.26	1705.35	5.00459e+06	750942	4.6028e+06	1.51727e+06	236057	142494	97101.4	5.32603e+06	633379	5.22952e+06	1.3459e+06	665166	1.23793e+06	360840	189638	94088.4	74685.8
BML-LCMS18-28.39-252.209	unknown	3.67765e+06	3.57579e+06	4.03899e+06	3.25016e+06	3.63006e+06	0	0	0	0	0	167736	16173.2	6160.23	20898.5	31070.3	571076	1.22263e+06	1.05633e+06	901990	892493	1.35557e+06	1.26131e+06	1.68129e+06	1.39706e+06	1.43822e+06
BML-LCMS18-30.11-472.283	C28H40O6; triterpenoid	3.5906e+06	3.73104e+06	3.6077e+06	3.22812e+06	3.60354e+06	0	0	0	0	0	0	0	0	0	0	1.98181e+06	5.0348e+06	4.48607e+06	2.97812e+06	3.15463e+06	2.19669e+06	1.5918e+06	2.24215e+06	1.81267e+06	1.76451e+06
BML-LCMS18-30.25-278.224	C18H30O2; possibly fatty acid	3.52667e+06	4.13669e+06	4.92175e+06	3.57582e+06	4.82875e+06	562149	910032	1.4355e+06	830583	1.21017e+06	4.38034e+06	4.87702e+06	2.32427e+06	1.13925e+06	510569	389704	441576	501725	240141	358510	1.54402e+06	1.26508e+06	1.34695e+06	1.012e+06	1.5153e+06
BML-LCMS18-18.64-882.689	unknown	3.3942e+06	1.39433e+06	327504	218169	178690	2144.22	3203.48	129233	4.42364e+06	938530	4.62301e+06	2.23692e+06	451185	239634	174817	3.80917e+06	537023	3.56755e+06	1.11125e+06	609257	1.50296e+06	511691	245508	128422	101113
BML-LCMS18-28.12-544.3038	unknown	3.35232e+06	3.18377e+06	2.89481e+06	2.58426e+06	3.15737e+06	0	0	0	0	0	0	0	0	0	0	98124.4	117429	131387	66596.9	139094	1.69245e+06	1.42349e+06	2.04864e+06	1.47079e+06	1.41589e+06
BML-LCMS18-26.62-462.2605	C26H38O7; functionalized diterpenoid	3.28212e+06	3.18402e+06	3.40181e+06	2.89531e+06	3.09438e+06	11178.4	23454.6	15350.1	13640.1	17257.2	0	0	0	0	0	2.08279e+06	2.09549e+06	1.42161e+06	2.28774e+06	2.2438e+06	8894.87	1.65671e+06	9073.07	7329.79	6223.9
BML-LCMS18-29.11-563.3449	unknown	3.26659e+06	3.01423e+06	3.04796e+06	3.13052e+06	2.82492e+06	8327.46	22688.3	9231.26	8290.97	14494.6	9520.77	35033	11300.8	19194.3	8918.77	983245	1.54066e+06	1.32941e+06	1.20352e+06	1.1522e+06	3.17353e+06	2.6474e+06	3.37868e+06	2.59446e+06	2.58582e+06
Amentoflavone-tri-hexoside II	biflavonoid glycoside	3.23899e+06	2.63771e+06	2.48396e+06	2.87776e+06	2.81191e+06	30191.4	50473.8	33083.9	36458.9	21966.4	1.50299e+06	3.25262e+06	2.52717e+06	1.62003e+06	1.30105e+06	6.06677e+06	6.73455e+06	6.89339e+06	6.31881e+06	8.41479e+06	5.02004e+06	4.6106e+06	5.34485e+06	4.89049e+06	5.25324e+06
BML-LCMS18-26.64-490.2933	unknown	3.14077e+06	3.03049e+06	3.28722e+06	2.65256e+06	2.90291e+06	0	0	0	0	0	0	0	0	0	0	191465	578776	525602	461708	394458	1.09156e+06	1.00794e+06	1.37124e+06	1.06928e+06	1.08076e+06
BML-LCMS18-29.07-570.3073	unknown	3.00025e+06	2.857e+06	3.00442e+06	2.94348e+06	2.75041e+06	44317.6	89391.3	51874.6	34082.7	74292.5	37282.9	118591	44692	59305.5	31408.3	1.00706e+06	1.61324e+06	1.61644e+06	1.261e+06	1.40234e+06	2.68403e+06	2.37012e+06	3.07459e+06	2.3933e+06	2.45165e+06
2,3-Dihydrohinokiflavone	biflavonoid	2.81876e+06	3.58367e+06	4.26639e+06	4.1739e+06	4.09077e+06	1.57776e+06	1.29994e+06	1.62675e+06	922185	1.1944e+06	2.05222e+06	4.24676e+06	3.90514e+06	4.11481e+06	4.5831e+06	4.27608e+06	5.42532e+06	4.85351e+06	5.04258e+06	6.72664e+06	5.64435e+06	4.67006e+06	5.70759e+06	4.33072e+06	4.49367e+06
BML-LCMS18-26.36-582.2818	unknown	2.80653e+06	1.98803e+06	2.32613e+06	3.35977e+06	1.49215e+06	120342	318099	109639	110172	206231	16104.7	11405.6	18755.4	60034.5	39138.3	1.01519e+07	6.15875e+06	4.34115e+06	9.64602e+06	9.11169e+06	6.55389e+06	6.03728e+06	6.80859e+06	6.80323e+06	7.66595e+06
BML-LCMS18-13.46-520.1947	C26H32O11; phenolic glycoside	2.71733e+06	2.94358e+06	2.93872e+06	2.53882e+06	2.95207e+06	49800.1	50610.7	38707.1	54066.8	49347.4	242048	514723	347372	123480	75819.9	1.87682e+06	2.91769e+06	2.70246e+06	2.32326e+06	2.89154e+06	1.76829e+06	1.87306e+06	2.13983e+06	1.76453e+06	1.92021e+06
Binaringenin	biflavonoid	2.67114e+06	2.82582e+06	3.12666e+06	3.06211e+06	3.07281e+06	383050	294293	445284	315883	273743	327313	549663	458261	378341	386849	3.35046e+06	4.23489e+06	4.40978e+06	4.10887e+06	5.43878e+06	4.55367e+06	4.37282e+06	4.78658e+06	3.81201e+06	4.2881e+06
BML-LCMS18-23.69-578.3088	C31H46O10; possibly steroid glycoside	2.6702e+06	1.93997e+06	2.41153e+06	3.12971e+06	1.9216e+06	16507	36180.9	16835.7	13440.8	18428.6	6744.06	7399.99	4782.25	32860.8	16417.3	1.6499e+06	2.69868e+06	1.72155e+06	3.0441e+06	3.12194e+06	7.94739e+06	7.17355e+06	7.59431e+06	7.39692e+06	7.86822e+06
BML-LCMS18-25.97-578.3092	C31H46O10; possibly steroid glycoside	2.56626e+06	1.99229e+06	2.10662e+06	3.11121e+06	2.52342e+06	26147.7	50379.1	29484.6	33753.9	33868.5	0	0	0	0	0	4.37199e+06	9.04938e+06	5.51938e+06	6.19223e+06	6.47723e+06	1.13316e+07	9.89438e+06	1.10731e+07	1.02334e+07	1.10413e+07
BML-LCMS18-5.12-144.0579	unknown	2.51344e+06	2.31636e+06	2.36066e+06	2.21658e+06	2.26195e+06	1.36518e+06	2.0425e+06	1.70239e+06	1.67435e+06	696739	71838	2.58639e+06	1.79897e+06	3.01853e+06	3.05286e+06	578686	885987	1.14748e+06	761798	1.18369e+06	2.59615e+06	2.57781e+06	2.999e+06	874709	2.68408e+06
BML-LCMS18-30.72-448.2814	C26H40O6; functionalized diterpenoid	2.50943e+06	2.18279e+06	2.20301e+06	2.81962e+06	2.4901e+06	21183.2	57212.4	26864.9	14693.5	33915.3	291226	210877	88905.5	82281.7	61233.8	4.63877e+06	3.36104e+06	2.63299e+06	4.86863e+06	4.43097e+06	3.81429e+06	3.21597e+06	3.67702e+06	3.4463e+06	3.64446e+06
BML-LCMS18-5.11-369.1428	unknown	2.29601e+06	2.10787e+06	2.20795e+06	2.30195e+06	2.26954e+06	3.23591e+06	1.54754e+06	4.16838e+06	3.89984e+06	4.65188e+06	4.74908e+06	5.82313e+06	4.18031e+06	2.06012e+06	6.74165e+06	1.95014e+06	2.84989e+06	3.44655e+06	2.43564e+06	3.63143e+06	3.16056e+06	3.03126e+06	3.35295e+06	2.54493e+06	2.70593e+06
2",3"- Dihydroamentoflavone	biflavonoid	2.16891e+06	793656	540254	575765	545439	617383	495085	592710	472967	425354	1.25376e+06	2.53273e+06	2.72653e+06	2.67379e+06	3.11195e+06	2.61223e+06	3.22958e+06	3.06282e+06	3.08864e+06	4.05195e+06	3.74345e+06	3.7804e+06	4.14751e+06	3.50985e+06	3.87855e+06
BML-LCMS18-13.96-452.335	C24H44N4O4; possibly background ion	2.12139e+06	620478	87724.4	51890.6	36929.3	947.223	1265.38	1065.37	2.23009e+06	248939	2.51486e+06	568924	89799.3	58287.6	33431.2	2.14643e+06	176663	2.14719e+06	395707	206419	424256	166118	114819	55080	43392.5
BML-LCMS18-28.11-526.2927	unknown	2.0078e+06	1.79071e+06	1.68481e+06	1.48654e+06	1.77908e+06	0	0	0	0	0	0	0	0	0	0	82725.6	161448	135383	86848.2	86767.9	815792	697763	1.04941e+06	773363	728414
BML-LCMS18-5.12-162.0671	unknown	1.95415e+06	1.77446e+06	1.84517e+06	1.71375e+06	1.72644e+06	961574	1.51135e+06	1.2603e+06	1.26812e+06	1.5877e+06	1.48622e+06	1.85841e+06	1.34986e+06	2.36223e+06	2.39654e+06	451146	699290	890558	569743	939920	1.99727e+06	1.99238e+06	1.46968e+06	1.9115e+06	2.05107e+06
BML-LCMS18-28.11-566.286	unknown	1.95398e+06	1.74013e+06	1.66375e+06	1.59096e+06	1.73754e+06	0	0	0	0	0	0	0	0	0	0	85711.8	179460	158402	124871	152433	1.06674e+06	844640	1.23246e+06	949275	899441
Hinokiflavone	biflavonoid	1.89761e+06	1.26646e+06	1.42716e+06	2.32542e+06	2.22145e+06	743999	597303	631310	326518	528107	1.76668e+06	2.85777e+06	2.53311e+06	2.58785e+06	2.93308e+06	2.31516e+06	2.32823e+06	3.10421e+06	2.57009e+06	3.2725e+06	2.46821e+06	1.93811e+06	2.36823e+06	1.95288e+06	2.06002e+06
BML-LCMS18-31.79-432.2885	unknown	1.79778e+06	1.68897e+06	1.95405e+06	1.50585e+06	1.70739e+06	0	0	0	0	0	0	0	0	0	0	10756.4	201747	48147	175411	161096	876052	799723	1.125e+06	861653	852279
BML-LCMS18-28.39-486.2583		1.67729e+06	1.61133e+06	1.84474e+06	1.52385e+06	1.66285e+06	0	0	0	0	0	0	43389.9	20468	15387.7	0	460913	817414	756331	612181	658617	872119	760762	910875	762937	809433
BML-LCMS18-28.92-1108.599		1.64785e+06	1.52397e+06	1.4736e+06	1.48421e+06	1.37395e+06	0	0	0	0	0	0	0	0	0	0	189504	631719	613097	414584	378423	1.09092e+06	1.21574e+06	1.84591e+06	1.34765e+06	1.32951e+06
BML-LCMS18-10.17-552.1840		1.62632e+06	1.36528e+06	1.4185e+06	1.429e+06	1.3675e+06	1.31411e+06	1.23412e+06	1.41925e+06	1.82076e+06	1.15533e+06	2.35085e+06	3.60714e+06	3.53519e+06	2.82426e+06	1.54326e+06	816133	1.37561e+06	1.60985e+06	1.30123e+06	2.01696e+06	2.7417e+06	1.14119e+06	2.76575e+06	2.71244e+06	2.65862e+06
BML-LCMS18-9.72-538.2044		1.62496e+06	1.31054e+06	1.32854e+06	1.46867e+06	1.28194e+06	702208	730527	1.12781e+06	1.02943e+06	722540	3.09472e+06	5.42502e+06	4.26701e+06	2.2301e+06	2.01146e+06	683445	2.07426e+06	1.86913e+06	1.16444e+06	2.24168e+06	2.91609e+06	2.74262e+06	3.28354e+06	2.96713e+06	2.88515e+06
BML-LCMS18-10.18-552.1841		1.58221e+06	1.33295e+06	1.38925e+06	1.40266e+06	1.33447e+06	1.27086e+06	1.20392e+06	1.37196e+06	1.75999e+06	1.12272e+06	2.22106e+06	3.5558e+06	3.35705e+06	2.60596e+06	2.66951e+06	789966	1.34248e+06	1.59544e+06	1.28123e+06	1.96974e+06	2.66406e+06	2.70375e+06	2.70592e+06	2.63173e+06	2.59619e+06
BML-LCMS18-10.18-574.1661		1.57643e+06	1.33651e+06	1.39184e+06	1.40822e+06	1.33511e+06	1.24505e+06	1.1823e+06	1.34601e+06	1.71749e+06	1.1042e+06	2.10074e+06	3.37051e+06	3.32751e+06	2.55862e+06	2.71843e+06	749132	1.37099e+06	1.61173e+06	1.25688e+06	1.94365e+06	2.59869e+06	2.6188e+06	2.67142e+06	2.50169e+06	2.52027e+06
BML-LCMS18-34.27-460.3186		1.5731e+06	1.6585e+06	1.77325e+06	2.51975e+06	2.66893e+06	0	0	0	0	0	0	0	0	0	0	651535	1.16075e+06	935888	1.11469e+06	1.31033e+06	807240	605186	971264	702423	704923
Apigenin-7-O-rhamnoglucoside	flavonoid glycoside	1.55469e+06	1.35714e+06	1.30538e+06	1.39072e+06	1.4572e+06	10698.6	19885.7	13370.8	13699.7	7681.14	600201	926291	747253	546599	547982	1.90654e+06	2.17266e+06	2.26365e+06	1.87206e+06	2.43873e+06	2.04747e+06	1.95014e+06	2.1088e+06	1.9086e+06	2.13845e+06
BML-LCMS18-12.22-598.1893		1.54639e+06	1.40664e+06	1.5375e+06	1.51834e+06	1.54664e+06	100920	94620.4	106655	104069	70076.7	138936	218913	154646	16510.5	21010.1	24849.5	78490.7	50788.2	27162.3	73632.1	389096	404240	299341	411836	490920
BML-LCMS18-32.05-358.3085		1.53461e+06	1.50876e+06	1.75688e+06	2.57887e+06	2.1835e+06	5.03268e+06	5.24348e+06	5.40693e+06	6.14119e+06	5.4853e+06	2.3831e+06	3.12554e+06	3.488e+06	4.09513e+06	3.82538e+06	4.31615e+06	3.84202e+06	4.74092e+06	3.94374e+06	5.78441e+06	4.16409e+06	3.32945e+06	4.06006e+06	2.94939e+06	3.74836e+06
BML-LCMS18-28.12-688.3405		1.51594e+06	1.3325e+06	1.2633e+06	1.14269e+06	1.33402e+06	0	0	0	0	0	0	0	0	0	0	0	0	0	0	0	56313.2	494225	777749	34688.6	508253
BML-LCMS18-29.75-572.3345		1.42852e+06	1.4991e+06	1.48549e+06	1.25275e+06	1.47517e+06	0	0	0	0	0	0	0	0	0	0	49283	253543	209345	110661	122515	446135	391491	596964	382295	379022
BML-LCMS18-27.05-450.2978		1.42104e+06	1.22841e+06	1.2281e+06	1.25647e+06	1.26603e+06	0	0	0	0	0	0	0	0	0	0	1.35335e+06	1.52685e+06	1.25433e+06	1.79414e+06	1.56641e+06	1.48229e+06	1.23157e+06	1.50449e+06	1.31401e+06	1.3335e+06
BML-LCMS18-40.33-609.1764		1.3682e+06	453834	105322	154259	95454.5	375849	1.83636e+06	418544	2.0845e+06	389539	136937	627444	527214	151273	91155.2	1.75145e+06	406607	2.20863e+06	552056	466214	405198	134495	125088	80102.1	92973.7
BML-LCMS18-25.8-354.2749		1.35073e+06	990748	1.12995e+06	1.51931e+06	822845	21603.9	57628.8	20234.2	20459.4	38174.2	11103	12339.4	10019	36058.7	15359	2.70308e+06	1.74647e+06	1.33421e+06	2.34487e+06	2.26841e+06	3.7025e+06	3.495e+06	3.74892e+06	4.15074e+06	4.16333e+06
BML-LCMS18-26.27-494.3238		1.34904e+06	1.24242e+06	1.27024e+06	1.11818e+06	1.2173e+06	0	0	0	0	0	0	0	0	0	0	530986	674753	593606	647059	578667	671717	550981	788163	552414	542199
BML-LCMS18-29.09-562.2976		1.25917e+06	1.21652e+06	1.23988e+06	1.28546e+06	1.19225e+06	27171.1	53945	26969.2	22981	41076.5	16946.8	87326.4	29051	42796.8	22081.2	545606	878309	936465	744433	787017	1.13542e+06	1.14665e+06	1.52196e+06	1.15625e+06	1.16492e+06
BML-LCMS18-11.41-192.0788		1.2547e+06	1.05533e+06	1.17552e+06	1.0246e+06	1.05258e+06	42847.4	73868.6	68854.7	49638.7	43138.7	282524	287608	383426	58386	6069.92	292947	14508	462203	373951	508859	11195.9	759683	1.02259e+06	8899.16	848595
BML-LCMS18-24.17-578.3066		1.24747e+06	937129	1.12195e+06	1.54051e+06	665026	17167.9	29951.7	13465.2	16995.4	28171.7	11124.3	13957.4	6311.53	21166.9	16034.5	710347	373445	248508	658484	564224	3.05205e+06	1.41493e+06	1.70648e+06	3.33413e+06	3.17506e+06
BML-LCMS18-29.09-548.3249		1.23457e+06	1.05896e+06	1.1415e+06	1.18664e+06	1.02605e+06	20351.2	51028.4	24867.4	27775.1	38977.3	22874.1	60873.1	17998.8	37769.2	20995.1	822972	1.08316e+06	1.03294e+06	918381	959646	1.45496e+06	1.22989e+06	1.40751e+06	1.20045e+06	1.18338e+06
BML-LCMS18-35.75-774.5269		1.20923e+06	1.34527e+06	1.38368e+06	1.31934e+06	1.57983e+06	210798	243802	175405	178113	208185	1.36715e+06	2.07841e+06	2.36221e+06	2.71749e+06	2.216e+06	561721	1.78736e+06	1.38713e+06	1.39692e+06	2.3722e+06	1.18808e+06	1.15764e+06	1.15436e+06	1.0699e+06	1.10385e+06
BML-LCMS18-36.84-446.3756		1.20711e+06	1.3973e+06	1.37346e+06	1.3071e+06	1.51856e+06	180136	167363	153785	101974	126556	655914	3.97351e+06	4.21148e+06	6.58269e+06	7.21385e+06	1.26789e+06	2.8837e+06	3.27406e+06	2.02296e+06	2.30991e+06	1.57028e+06	1.88222e+06	2.24299e+06	1.56988e+06	1.80674e+06
BML-LCMS18-18.64-904.6693		1.20669e+06	413268	83160.1	59055.1	48627.7	2470.07	4324.05	2626.3	1.73157e+06	343797	1.62621e+06	720135	125407	65614	53152	2.0998e+06	285943	1.87196e+06	611137	342585	586481	176820	83713.3	42549.7	30487.9
BML-LCMS18-28.44-520.3025		1.20493e+06	1.05528e+06	992760	1.19817e+06	929073	11697.3	32191.6	10717.1	14229.2	20619	10260.1	23394.1	12854.7	12545.8	15335	1.00406e+06	802379	602837	997446	843618	1.80644e+06	1.56674e+06	1.84894e+06	1.70068e+06	1.72909e+06
BML-LCMS18-4.73-384.0804		1.18289e+06	1.35134e+06	1.22034e+06	1.26524e+06	1.19156e+06	187299	240234	164978	144724	276052	149335	275628	194879	185340	182739	652639	1.17915e+06	1.62556e+06	1.19513e+06	1.64233e+06	1.15631e+06	1.08248e+06	1.72901e+06	1.36767e+06	1.32692e+06
BML-LCMS18-31.15-745.3653		1.16701e+06	1.09708e+06	1.31994e+06	1.9013e+06	1.71236e+06	0	0	0	0	0	0	0	0	0	0	670397	1.34844e+06	1.20031e+06	1.28313e+06	1.48374e+06	1.76199e+06	1.43105e+06	1.88783e+06	1.5916e+06	1.68625e+06
BML-LCMS18-27.3-518.2875		1.1572e+06	1.08152e+06	1.11198e+06	1.02778e+06	1.00185e+06	0	0	0	0	0	0	0	0	0	0	133272	286809	205009	228028	175780	644041	564705	813845	635797	571401
BML-LCMS18-5.07-148.0528		1.1571e+06	1.20593e+06	1.14065e+06	1.00875e+06	1.05732e+06	407125	664737	487821	514750	681513	674628	788115	556161	1.01491e+06	1.07377e+06	261386	494425	622336	398408	703289	1.26287e+06	1.25463e+06	1.47119e+06	1.19523e+06	1.27326e+06
BML-LCMS18-30.72-470.2632		1.11792e+06	983033	1.00026e+06	1.25237e+06	1.16672e+06	8549.45	26168.4	13753.3	8271.69	17263.5	156364	119391	47873.7	47348.9	33427	1.95097e+06	1.39395e+06	1.11924e+06	1.91728e+06	1.81533e+06	1.68267e+06	1.40935e+06	1.60675e+06	1.49505e+06	1.60635e+06
BML-LCMS18-32.43-592.2687		1.10929e+06	1.65488e+06	2.36383e+06	2.4067e+06	2.1784e+06	192692	165490	181595	67223.8	134411	1.70777e+07	2.02807e+07	1.85323e+07	1.19547e+07	7.58332e+06	88722.3	103582	59099.3	45462.9	42812.9	674364	729426	932410	707727	707411
BML-LCMS18-5.00-164.0474		1.10636e+06	1.03935e+06	1.11536e+06	1.0074e+06	1.0295e+06	20101.8	27954	17474.2	9627.32	42708.5	20693.4	27201.3	17854.1	23126.8	19265.4	401847	823166	960211	570620	1.01718e+06	1.27428e+06	1.27081e+06	1.37571e+06	1.14672e+06	1.14872e+06
BML-LCMS18-25.97-560.2978		1.09821e+06	860321	866045	1.25896e+06	1.07132e+06	0	0	0	0	0	0	0	0	0	0	692575	2.51352e+06	1.59882e+06	1.58275e+06	1.49535e+06	4.89338e+06	4.56676e+06	4.9825e+06	4.85574e+06	5.17722e+06
BML-LCMS18-10.99-340.1324		1.08045e+06	923282	1.00954e+06	1.01893e+06	905207	17354.9	22289	21103.5	15282.1	27414.5	6139.9	27894.6	28659.8	18419.9	9902.19	276458	451082	429768	342464	474072	745646	694542	915719	791467	757640
BML-LCMS18-30.65-356.2919		1.06471e+06	1.202e+06	1.58762e+06	867797	1.21151e+06	260467	218990	111892	87479.6	116389	589106	637181	655068	817539	602416	657733	698632	549038	660590	617130	833936	982811	1.47259e+06	1.13526e+06	695261
BML-LCMS18-27.63-494.2883		1.03953e+06	990121	1.02425e+06	977551	976737	0	0	0	0	0	0	0	0	0	0	142757	359381	280196	265514	267778	708787	602019	776564	640718	653587
BML-LCMS18-33.43-462.3339		1.0298e+06	1.00943e+06	1.08655e+06	1.77696e+06	1.73768e+06	9816.37	27885.8	13209.6	9600.75	17412.5	0	0	0	0	0	1.83178e+06	2.1286e+06	1.78351e+06	2.45798e+06	2.77289e+06	2.17052e+06	1.6459e+06	2.20188e+06	1.78289e+06	1.92156e+06
BML-LCMS18-27.76-670.3705		1.0175e+06	888281	863413	808638	819005	0	0	0	0	0	0	0	0	0	0	172522	182647	183052	182936	201346	685662	652401	803828	724415	720459
BML-LCMS18-27.63-516.2683		1.00461e+06	958861	989381	938230	945422	0	0	0	0	0	0	0	0	0	0	135345	341753	264320	259992	265031	676921	576097	745480	614640	630768
BML-LCMS18-30.04-330.2771		992879	987021	1.15162e+06	1.30724e+06	1.10573e+06	2.90084e+06	2.96696e+06	3.19684e+06	3.64013e+06	3.26946e+06	1.91506e+06	2.2318e+06	2.14634e+06	1.99089e+06	2.08476e+06	2.3924e+06	1.80718e+06	2.40765e+06	1.98101e+06	2.78808e+06	1.79004e+06	1.61766e+06	1.93028e+06	1.40409e+06	1.63111e+06
BML-LCMS18-29.75-554.3242		964447	1.02322e+06	1.01821e+06	904625	984435	4343.83	5986.76	9411.27	10615.8	9213.87	14566.1	14917.4	17202.8	17610.7	24711.4	99435.5	222530	184822	126750	106237	340181	284712	434796	319126	298310
BML-LCMS18-24.81-494.3225		963238	826100	850869	816732	810582	10894.4	5606.68	3607.63	3979.81	3710.08	7250.13	17934.6	6146.56	7822.34	9592.03	222423	211375	191113	284998	245789	670219	632632	815202	686650	683668
BML-LCMS18-29.77-594.3166		948735	998707	1.00647e+06	911924	942745	0	0	0	0	0	12550.6	26316.2	16000.7	11111.8	10625.7	120456	280052	217317	140662	162921	425013	362013	529913	369427	359365
BML-LCMS18-25.97-524.2744		943099	750522	740249	1.05281e+06	898625	0	0	0	0	0	0	0	0	0	0	262691	291242	59941.1	1.26195e+06	1.25867e+06	3.83049e+06	3.63217e+06	3.94231e+06	3.84243e+06	4.09946e+06
BML-LCMS18-19.25-995.7717		921535	370691	107393	77544.5	61130.9	3307.03	2719.44	3018.85	1.42098e+06	361848	1.33742e+06	758189	168137	92474.1	74253.2	1.05957e+06	186537	989305	350917	234735	468599	173278	94420.8	51386.6	40413.2
BML-LCMS18-5.02-160.0531		889013	845967	1.45629e+06	860091	1.3447e+06	228266	311199	238718	218152	353442	230261	338875	250819	398289	420832	557569	1.02093e+06	1.24014e+06	493739	1.26487e+06	1.10379e+06	1.05811e+06	1.85461e+06	938416	1.58013e+06
BML-LCMS18-38.17-888.573		866927	834669	766124	827502	924755	0	0	0	0	0	0	0	0	0	0	0	0	0	0	0	51873.4	43986.5	115547	65721	47084.8
BML-LCMS18-7.04-386.1589		859326	736735	857963	717818	472537	1.0464e+06	1.43808e+06	1.16932e+06	1.35063e+06	1.43511e+06	1.2301e+06	1.52696e+06	1.45558e+06	1.0475e+06	914196	775564	803703	885281	645146	1.15928e+06	1.84932e+06	1.83941e+06	2.38706e+06	1.60067e+06	1.48724e+06
BML-LCMS18-26.62-176.0468		854382	788662	810753	714606	764703	0	0	0	0	0	0	0	0	0	0	481526	531185	378268	584519	553651	338994	305410	419573	350010	355931
BML-LCMS18-25.79-506.3439		852624	606534	690894	931114	504000	17676.7	36645.5	13068.1	16215.5	25080.2	0	0	0	0	0	2.24748e+06	1.67354e+06	918298	2.361e+06	1.97962e+06	2.86405e+06	2.70082e+06	2.73442e+06	3.52574e+06	3.48623e+06
BML-LCMS18-5.03-132.0596		851844	815071	828138	775253	788878	338145	490659	274716	275277	350166	219050	367983	560115	419465	503985	305515	534514	678128	408758	719281	1.00049e+06	670794	1.44328e+06	910106	902596
BML-LCMS18-31.86-282.2552		845783	933459	1.2763e+06	739749	1.01681e+06	211005	197277	192720	205153	193040	588420	1.75745e+06	1.75345e+06	1.66082e+06	1.42226e+06	819814	472717	390315	691891	575168	880244	1.01438e+06	1.29236e+06	983370	678397
BML-LCMS18-32.4-364.2604		844873	851799	917057	895825	895326	437424	659528	537933	348985	430184	907975	1.15881e+06	1.16323e+06	1.42074e+06	1.52679e+06	60194.9	74407.9	38395.3	35362.9	60884.3	877721	903558	916389	795825	882745
Amentoflavone-di-hexoside I	biflavonoid glycoside	843367	702096	660969	748236	728323	8703.45	12473.6	9010.37	7980.99	5727.08	366115	842637	675306	411225	309378	1.75193e+06	1.7134e+06	1.67289e+06	1.73762e+06	2.32441e+06	1.36678e+06	1.2163e+06	1.5191e+06	1.43237e+06	1.5301e+06
BML-LCMS18-29.94-570.5187		820048	765931	768233	774066	775410	0	0	0	0	0	0	0	0	0	0	187832	286751	214685	279215	242775	774577	689513	845206	738733	740777
BML-LCMS18-29.39-666.3403		814940	800949	815858	657457	714624	0	0	0	0	0	0	0	0	0	0	75500.9	114533	167309	85704.1	110805	381937	323956	435978	350701	359657
BML-LCMS18-27.63-476.2776		806881	778473	784638	747817	766062	0	0	0	0	0	0	0	0	0	0	117674	292397	229452	216156	215314	482564	419039	566976	466629	454245
BML-LCMS18-25.7-474.2972		803936	733787	756175	610188	718185	0	0	0	0	0	13468	21518.8	21741.6	15303.7	27097.9	113033	178940	150009	149177	148467	297235	283354	377584	294396	303038
3'-Hydroxypsilotinin-di-O-hexoside	phenolic glycoside	788051	852006	772534	622028	802305	42090.1	96115.6	41923.5	74670	101368	53490.6	149257	437960	695627	601058	243766	475921	618688	495997	429274	816986	851446	883288	784587	812777
BML-LCMS18-25.63-584.2958		786858	707060	709680	578419	713524	41657.2	42894	40292.6	47039	36604.5	681301	720495	840277	1.16294e+06	865540	51213.4	135523	120927	95419.1	115448	305643	298080	396504	304331	288430
Psilotinin-di-O-hexoside II	phenolic glycoside	781874	993343	1.1893e+06	948855	1.36933e+06	1.01419e+06	3.42662e+06	1.68697e+06	801829	1.44205e+06	5.44613e+06	4.33206e+06	8.27357e+06	4.90778e+06	4.78143e+06	737905	1.09623e+06	1.77308e+06	1.348e+06	1.69159e+06	190169	194992	196060	174805	185969
BML-LCMS18-5.13-106.0434		767676	3.0978e+06	3.27957e+06	3.10688e+06	3.11279e+06	3.96892e+06	5.53693e+06	4.95868e+06	4.78666e+06	1.90945e+06	4.75482e+06	6.28094e+06	4.89947e+06	5.43982e+06	4.20848e+06	1.37221e+06	1.29604e+06	1.60193e+06	1.79683e+06	1.75121e+06	3.19551e+06	3.07538e+06	3.73481e+06	2.91935e+06	3.32679e+06
BML-LCMS18-9.85-594.1578		755986	665240	681060	689682	701172	36055.3	25706.4	30855.9	31667.2	22481.4	206915	372581	403263	346485	376645	488360	638468	915817	609072	786089	959075	987304	978836	858026	856942
BML-LCMS18-30.36-628.3532		755515	644970	696627	662104	714856	0	0	0	0	0	0	0	0	0	0	433593	539332	462603	494151	497178	534658	487820	579981	505105	493214
BML-LCMS18-24.17-598.2741		746241	573829	671544	782984	447860	8233.48	14461.1	6913.08	5129.97	10322.4	6641.92	3880.09	7472	12756.1	6406.38	555107	315371	212160	557917	479178	1.79761e+06	1.81788e+06	787612	2.1657e+06	1.89519e+06
BML-LCMS18-13.42-484.3228		740573	190458	17931.6	10807.7	7209.87	975.027	548.654	1080.55	691713	55643.7	708302	91803.8	6952.15	785.433	1041.05	742729	41418.4	777807	117006	41185.3	146357	37871.4	15130.9	5704.84	2587.47
BML-LCMS18-27.43-236.2135		734500	664146	701369	606425	672874	0	0	0	0	0	0	0	0	0	0	125383	224920	186253	207275	184396	342946	316908	409989	350968	356808
Amentoflavone-hexoside I	biflavonoid glycoside	728950	541462	492739	554743	542792	17726.1	19118.1	19042.1	24325.6	16892.3	310049	811352	707647	393161	271219	2.04888e+06	2.22429e+06	1.93131e+06	1.99648e+06	2.62019e+06	1.21716e+06	1.1684e+06	1.29255e+06	1.18314e+06	1.25511e+06
BML-LCMS18-30.1-590.3382		727606	723132	760476	786760	735784	49244.6	81883.5	87787.1	49579.6	53629.3	3.12196e+06	2.85534e+06	2.49865e+06	3.93101e+06	4.2333e+06	427797	419219	400416	450307	423088	674830	637920	806671	704090	712408
BML-LCMS18-40.65-662.4457		725329	533599	226168	295589	266910	291724	404481	366159	1.09931e+06	378789	116909	429270	214945	203937	233102	890207	326785	923658	477564	308490	482442	250905	229435	152556	181963
BML-LCMS18-10.63-339.2506		724988	205477	30632.6	18267.8	13319.5	362.881	408.831	882.879	750238	85190.1	805124	191705	35555.4	21168.8	13247.3	729558	63177	735835	142645	75395.9	152043	60236	40674.1	20851	15961.5
BML-LCMS18-27.84-494.289		705222	623171	611911	702616	543493	0	0	0	0	0	0	0	0	0	0	521027	387077	241362	472511	373436	580564	501623	613076	550675	535518
BML-LCMS18-31.18-550.3503		700595	581675	577774	610001	550635	0	0	0	0	0	0	0	0	0	0	1.16219e+06	962128	715597	1.22741e+06	1.09032e+06	983284	914441	1.05945e+06	944301	920942
BML-LCMS18-20.49-596.3189		695293	491819	630818	863077	437052	12495.7	22711.4	13381.9	14761.6	18639.4	9252.95	14735.3	16538.7	27597.8	30400.6	1.02359e+06	1.04315e+06	620669	1.21809e+06	1.18111e+06	1.9381e+06	1.92294e+06	1.67874e+06	2.16711e+06	2.17576e+06
BML-LCMS18-29.81-476.3163		694673	710119	912670	571756	892792	0	0	0	0	0	0	0	0	0	0	455407	990021	834675	748341	698260	326194	280397	338400	288016	296024
BML-LCMS18-14.20-684.1896		671509	683069	693734	605871	790663	14728.8	6011.32	8517.88	8623.25	5279.58	116844	73997.9	28878.1	1953.77	1645.43	6459.48	17161.7	15746.5	8128.55	15743.2	103040	100892	89503	94584.6	113404
BML-LCMS18-23.87-560.2967		670583	470989	265715	853853	344410	13572.2	28656.5	14051.9	19164.1	27409.3	0	0	0	0	0	1.14942e+06	577273	423046	1.18461e+06	977073	367307	92839.4	1.95124e+06	2.37537e+06	395251
BML-LCMS18-30.78-404.2556		657805	721955	632438	545829	689895	147611	119794	148801	147745	130198	174734	14731.8	132572	165558	130530	243865	191660	206053	164554	224830	245898	196301	272532	202223	192282
BML-LCMS18-30.25-478.3269		654880	606980	676433	749688	766558	0	0	0	0	0	0	0	0	0	0	195981	176087	72513.3	274557	248642	549572	457214	603036	464177	502088
BML-LCMS18-35.75-791.5529		651986	726276	735201	702417	850589	125100	142899	103687	108861	116075	821595	1.34948e+06	1.65313e+06	1.82269e+06	1.40817e+06	281790	940642	705433	735836	1.23447e+06	635467	628272	632314	591392	595477
BML-LCMS18-10.65-371.2409		649860	167032	17717.9	9513.85	10249.5	2512.34	4838.52	3973.49	774394	60162.9	718173	90245	28209.4	22962.4	23084.9	628359	39284.9	683145	108717	46815.8	138530	39713.1	17110.8	9133.42	0
BML-LCMS18-10.16-372.1216		648770	567298	581976	586509	552499	638299	685537	756551	918561	614147	1.06997e+06	1.72466e+06	1.66881e+06	1.26607e+06	1.16616e+06	366853	563302	709145	556627	836190	979813	1.00071e+06	999062	992917	993782
BML-LCMS18-5.11-130.0417		645623	582667	596896	522281	575369	101008	167166	404182	421953	511830	21556.9	571223	422770	791790	832102	139819	239234	289802	183729	309217	706512	709699	286040	700256	750854
BML-LCMS18-21.15-1076.177		645320	514888	462112	481161	472654	197406	149908	159239	101800	128554	466936	657376	593543	647536	675207	585769	597720	575586	544303	660191	739380	631604	757103	578420	621857
BML-LCMS18-20.34-618.3004		645175	459846	578298	785721	401715	0	0	0	0	0	0	0	0	0	0	1.02372e+06	953891	578265	1.1808e+06	1.18983e+06	1.80829e+06	1.80523e+06	1.57471e+06	2.03255e+06	2.02438e+06
BML-LCMS18-5.01-790.1404		644862	801317	768030	789888	756144	107406	148075	102981	88443.3	182721	83448.2	159758	113605	112612	104610	367880	778348	1.13037e+06	774221	1.1209e+06	625056	617887	1.10821e+06	881090	853797
BML-LCMS18-2.91-433.1350		636803	855582	807976	788654	449536	0	0	0	0	0	0	0	0	0	0	0	0	0	0	0	0	0	0	0	0
BML-LCMS18-26.37-542.2885		635324	445403	504809	750134	387514	27459.1	53868.2	35330.6	25960.8	35544.4	8718.72	8863.23	8307.1	13720.9	8521.42	4.80403e+06	2.02208e+06	1.06807e+06	4.6189e+06	3.56312e+06	2.14163e+06	2.043e+06	2.01458e+06	2.68843e+06	2.63923e+06
BML-LCMS18-5.11-774.1546		631461	709801	672788	700792	685594	546975	704019	557936	529850	716068	516907	770013	536627	694115	676666	377075	545239	759625	614348	758421	547806	500195	946479	717388	710377
BML-LCMS18-13.37-682.2466		625420	613880	625097	648184	634176	0	0	0	0	0	0	0	0	0	0	51412.3	78388.9	75438.5	62770.2	69759.3	364430	342906	492418	379374	365752
BML-LCMS18-31.39-550.3502		624097	570294	644391	1.06308e+06	858763	14886.7	24527.1	13464.3	12208.2	22906	0	0	0	0	0	1.22549e+06	1.18286e+06	915895	1.49286e+06	1.53539e+06	1.13511e+06	911880	1.16018e+06	1.06012e+06	1.10188e+06
BML-LCMS18-13.79-327.2508		619260	174595	20769	12979.2	9172.72	57.61	267.37	534.824	709989	69082.9	702904	122498	17988.8	11798	8091.79	679198	52613.5	664618	113196	51167.1	121061	39516.8	20494.9	10881.5	8040.21
BML-LCMS18-21.08-289.2607		619033	281950	70502.2	106900	49432.6	26805.5	7803.29	15334.9	643026	148300	705732	473940	99955.2	62514.1	43239.5	769251	128453	679653	241728	149493	233129	121279	105330	55129.5	47931.7
BML-LCMS18-27.43-254.224		617810	558944	578011	506228	574430	0	0	0	0	0	0	0	0	0	0	136985	235413	192661	229684	193073	286403	277845	352774	295871	321316
BML-LCMS18-25.8-584.2967		616529	421940	516054	673220	405848	13329.7	29324.1	10089.9	10402.2	22187	4160.6	1893.71	1318.61	12522.7	6684.04	335685	1.25315e+06	722539	892119	835067	2.15611e+06	1.98114e+06	2.0939e+06	2.2196e+06	2.2114e+06
BML-LCMS18-26.36-561.3025		606094	462445	554887	723281	410720	27784.5	79553.4	28803	25877.5	53490.8	6281.1	4487.05	6971.87	15832.1	14024.6	3.03723e+06	1.72732e+06	1.09746e+06	2.64502e+06	2.69558e+06	1.70645e+06	1.60929e+06	1.4561e+06	1.89056e+06	1.75775e+06
BML-LCMS18-31.22-624.2597		602400	550579	575490	568251	571545	0	0	0	0	0	0	0	0	0	0	297747	378222	255904	400743	366834	619957	577655	767558	470012	616629
BML-LCMS18-25.24-576.2919		593691	461643	576888	591275	444395	0	0	0	0	0	0	0	0	0	0	1.22526e+06	800884	463504	1.50373e+06	1.40611e+06	221666	276361	232846	290479	0
BML-LCMS18-4.77-258.1552		590268	150719	11734.5	7757.68	8224.94	6534.24	3746.68	4580.47	760857	49836.3	702790	79037.7	13873.5	6634.68	3710.84	760230	38158	734960	117898	34064.4	97811.1	19472.3	0	0	0
BML-LCMS18-26.46-257.241		590012	236284	101194	84302.2	78749	6832.96	31672.9	12140.6	742141	110992	712339	235300	130183	102367	92694.7	591112	210785	731698	219559	186305	186668	113285	128488	94946.5	92165.4
Psilotinin-di-O-hexoside I	phenolic glycoside	584123	515168	508842	506770	501890	186283	271616	210994	228277	284097	1.08831e+06	369287	169804	408790	445164	237395	115699	148795	80251.6	150985	344395	683806	891101	607662	627712
BML-LCMS18-33.04-475.3297		581389	579571	478145	440848	569137	0	0	0	0	0	0	0	0	0	0	113389	162525	141111	152516	138713	143163	125757	187846	124722	114005
BML-LCMS18-26.18-584.2886		580067	143916	437213	630976	150746	8150.38	21439	8848.26	7684.36	11248.8	0	0	0	0	0	163805	257248	217302	218134	265079	521224	350049	148795	151262	367867
BML-LCMS18-29.33-498.2929		574733	540725	559483	490903	581734	0	0	0	0	0	0	0	0	0	0	283274	421571	347006	385235	273878	350762	292119	386822	319282	338995
BML-LCMS18-31.14-722.3652		574374	580610	601845	507352	569976	0	0	0	0	0	0	0	0	0	0	162570	364218	352614	234686	227264	271586	251064	305088	255234	240556
BML-LCMS18-17.43-618.2681		571569	521432	505422	457712	528591	336147	373284	397050	424588	149462	450729	99010	39773.6	190722	131036	17550.3	376289	279735	76059.4	117350	1.68323e+06	1.49332e+06	1.58842e+06	1.23631e+06	1.18262e+06
BML-LCMS18-25.7-492.3083		571488	508502	512512	458191	480518	0	0	0	0	0	8814.07	18067.4	10012.5	11442.1	9890.43	71924.7	122561	91489.4	108277	103699	279828	250467	338970	296329	287632
BML-LCMS18-23.59-464.277		569660	533150	555995	462020	551429	0	0	0	0	0	0	0	0	0	0	197975	400653	368423	294789	273824	262129	223439	328892	222624	245532
BML-LCMS18-4.66-514.1702		568017	606773	585556	493868	569588	355565	704441	450190	378689	619010	1.02207e+06	1.32252e+06	2.92293e+06	6.95926e+06	5.59772e+06	350705	347816	608336	753752	981500	208975	269784	273996	261583	271120
BML-LCMS18-4.03-452.2152		563904	699403	949388	647785	935459	4.54998e+06	1.00264e+07	7.91486e+06	7.89374e+06	9.78803e+06	3.95516e+06	3.80756e+06	2.57567e+06	462698	382335	461181	744107	370750	395777	1.09195e+06	16426.5	120361	123434	120360	129289
BML-LCMS18-32.05-446.2675		562583	446067	447519	564563	508094	0	0	0	0	0	0	0	0	0	0	63790.7	179888	114566	163327	115302	795845	743182	942249	919617	952880
BML-LCMS18-12.62-537.2204		561391	458249	435268	475998	439852	142742	116687	197146	171398	106283	963902	1.49832e+06	1.03565e+06	323691	132184	73189.7	222165	195118	100786	228582	857976	898569	813050	846163	863167
BML-LCMS18-30-276.2085		560323	561355	588088	551148	622174	368217	280556	507336	394530	399256	270793	1.168e+06	696544	277328	83804.9	263812	240385	224614	376134	430240	883295	814981	821609	764986	625773
BML-LCMS18-29.81-566.3236		557114	434966	411793	416487	363014	687719	488952	679317	614649	383608	5.51479e+06	3.74025e+06	2.24045e+06	2.50744e+06	2.06564e+06	1.08534e+06	1.90056e+06	1.50275e+06	1.4217e+06	2.17219e+06	602971	629554	639254	691961	670473
BML-LCMS18-11.05-520.1949		552086	481403	533283	536419	493685	20350.1	23689.4	24845.6	16479.1	26806.4	24349.2	53225.2	133707	147386	170284	420618	584201	659865	613725	729146	365437	359165	467166	412937	418475
BML-LCMS18-27.14-492.323		550040	409299	633346	455205	595426	9983.32	11970.9	9889.6	11804	7919.19	168591	231848	241534	415628	341895	554886	699016	773356	640397	669505	198557	130911	197050	159216	159595
BML-LCMS18-14.98-597.4061		546025	152879	12817.6	6910.01	6638.68	1118.77	1158.09	1743.27	606817	52597.9	711269	99773.9	11223.6	6172.2	6280.61	687760	41502.8	713544	112643	41501.9	138450	34513.7	11177.5	6567.46	4587.8
BML-LCMS18-27.16-506.3231		544746	524108	629240	519988	572232	0	0	0	0	0	0	0	0	0	0	230744	301028	206355	340458	312280	294203	260992	310268	260245	291912
BML-LCMS18-5.12-116.0633		544360	514162	525264	490004	483423	312377	430116	364325	363443	433199	437226	542818	400037	665207	728036	130082	212484	261705	170768	285190	555455	544265	636738	523944	184081
BML-LCMS18-26.62-250.1931		542231	520889	562197	455278	507383	0	0	0	0	0	0	0	0	0	0	288572	285226	180303	330872	300624	241696	229499	286355	273347	272230
BML-LCMS18-13.45-340.1328		541773	550412	530138	444074	576794	4769.29	1194.67	3190.74	4780.53	4025	25604.5	43779.8	26898	4909.33	4151.43	269290	421591	380715	336784	418220	263383	248038	297410	252612	270866
BML-LCMS18-25.69-514.3129		541630	510886	507240	449484	460335	0	0	0	0	0	1834.2	4778.98	1773.44	1980.25	1603.95	75975.3	121291	92956.4	109319	95827.1	273542	244192	317152	272120	269423
BML-LCMS18-28.92-846.9386		529245	493909	458341	418391	435682	0	0	0	0	0	0	0	0	0	0	7541.73	93429	94479.2	41408.8	36072.1	231556	265901	441097	297573	288697
BML-LCMS18-40.33-611.1755		527680	169110	37520.8	58179	37199.5	143988	692097	162062	784261	151738	50929.8	249453	199502	60015	34707.9	665252	159624	828108	218166	184017	159407	52906.3	49751.9	29715.8	37586.4
Amentoflavone-di-hexoside II	biflavonoid glycoside	527444	456395	394478	489932	475798	13038.9	17833.9	11179.7	15409.8	8683.02	254635	705555	584443	312995	227832	1.83726e+06	1.99789e+06	1.74935e+06	1.89842e+06	2.60455e+06	833177	875335	985384	939860	971299
BML-LCMS18-34.65-390.2756		521939	419227	418899	366687	358563	235108	274140	243290	316545	255566	334014	622393	637474	655090	735608	624394	306089	369942	527497	636367	354293	288032	343684	254916	313372
BML-LCMS18-13.42-358.1433		518428	543919	514132	436176	550369	5768.97	3323.04	4979.36	6876.18	6294.99	30179.3	50767.5	34045.9	10714.9	8353.34	266976	387827	372316	324369	388808	249703	235817	283872	235792	250088
BML-LCMS18-26.68-562.3137		514756	439154	485513	608948	396290	0	0	0	0	0	0	0	0	0	0	2.67559e+06	1.68849e+06	1.01515e+06	2.7627e+06	2.4285e+06	1.00188e+06	940137	1.00345e+06	1.13661e+06	1.15197e+06
BML-LCMS18-30.36-262.2293		506741	542395	562082	386630	575780	0	0	0	0	0	0	0	0	0	0	57943.6	130039	106069	94197	92165	102849	93856.3	125374	86825.9	110292
BML-LCMS18-28.39-216.1874		505757	493095	548717	444254	496698	0	0	0	0	0	0	0	0	0	0	83031.2	169403	147890	133871	135940	199914	192748	253638	205584	221482
BML-LCMS18-12.62-502.1833		502643	411772	390444	403636	385494	139779	84190.6	204558	184541	112541	822520	1.29048e+06	792324	270255	169123	79534.4	263741	235320	134358	265171	778295	797455	801781	818185	789905
BML-LCMS18-11.94-524.2256		496518	493684	562474	485469	471628	1.41595e+06	1.68441e+06	1.7453e+06	1.78453e+06	1.60712e+06	1.46882e+06	2.15555e+06	1.77416e+06	679974	621911	420496	687133	493814	428043	928674	504210	484642	486981	500202	481963
BML-LCMS18-32.04-600.2921		494094	342799	371875	383808	377579	0	0	0	0	0	0	0	0	0	0	55080	165827	80586.7	132865	92230.3	779301	633132	673316	708858	863736
BML-LCMS18-14.73-738.2492		488858	521462	528648	485062	495796	13457.5	11374.7	13980.7	17205.7	13529	82928.4	104574	77857.2	57235.9	46620.2	152679	394932	382963	221533	329564	638109	651422	700099	583804	548399
BML-LCMS18-24.57-576.292		487352	420286	444743	574493	378349	0	0	0	0	0	7932.56	0	0	0	0	1.1148e+06	867644	611780	1.19884e+06	1.13745e+06	749032	743925	918538	838023	833170
BML-LCMS18-10.56-760.2412		486164	381639	369142	387178	394740	0	0	0	0	0	145202	437902	400098	106021	84362.2	0	0	0	0	0	749886	816057	762142	668872	732370
BML-LCMS18-30.66-280.2398		478692	586148	638005	472611	526362	400715	420711	419782	239819	407658	1.25524e+06	1.63377e+06	1.20329e+06	1.18154e+06	1.46694e+06	205371	225906	211483	197843	210164	312097	306706	358407	269243	274768
BML-LCMS18-12.62-520.1940		476593	413628	401471	293601	245412	752509	687118	908677	1.07263e+06	629579	714172	1.13109e+06	662513	199508	157175	39345.3	146913	127257	64943.1	145441	786573	830823	788643	817814	841235
BML-LCMS18-28.85-670.3709		472039	433532	426363	419685	395011	0	0	0	0	0	0	0	0	0	0	234993	293821	278322	272519	252936	328891	320248	407982	332312	316101
BML-LCMS18-35.31-741.5739		467044	582587	868562	983042	1.20797e+06	2.27354e+06	3.14856e+06	2.55895e+06	2.18279e+06	2.51968e+06	499104	951535	1.19119e+06	1.20571e+06	1.16901e+06	1.34784e+06	2.13006e+06	2.1982e+06	1.93852e+06	2.44442e+06	1.23326e+06	938995	1.26244e+06	1.00917e+06	1.13444e+06
BML-LCMS18-19.88-148.016		466336	267904	205260	186864	240067	211989	173058	174830	471909	189012	497677	236660	190244	236900	187043	459078	165457	450812	197185	218308	209223	129118	169485	183775	126563
BML-LCMS18-4.03-290.1624		466034	558756	801432	519767	837964	4.57705e+06	9.87306e+06	7.40483e+06	7.85779e+06	9.19664e+06	495130	1.28291e+06	886329	160676	151468	455421	741030	339578	391371	1.07623e+06	91127.3	106384	106912	108060	120895
BML-LCMS18-33.5-340.3445		465003	554295	730484	459918	352251	375667	284753	385290	246849	175287	99390	384190	423513	218263	197268	524780	625421	645380	417250	574318	777888	579239	537649	342027	371086
BML-LCMS18-24.28-466.2928		463314	413436	443432	327495	441167	0	0	0	0	0	0	0	0	0	0	565449	745242	573621	740261	678985	362555	275733	363585	280056	275813
BML-LCMS18-27.34-486.2598		462466	397316	394344	456021	371190	8013.36	11630.8	8649.12	4310.38	6809.14	0	0	0	0	0	1.7878e+06	1.43427e+06	866711	1.9988e+06	1.83939e+06	646990	556378	582915	584466	635900
BML-LCMS18-10.16-569.2103		460703	388025	405666	414931	387850	310612	305227	356060	430199	272181	944619	1.44914e+06	1.428e+06	576321	521931	221879	359206	447854	349338	547280	834144	836431	756668	736678	697177
BML-LCMS18-29.59-548.3318		459935	458364	463138	371312	421451	8759.65	11843.7	10077.2	10054.5	15281.8	18303.4	28515.5	17279.1	28660.2	26141.4	74958.1	132613	132603	105627	109207	315070	265445	345288	283155	317416
BML-LCMS18-5.19-567.0815		458012	522263	518626	555429	482497	733897	852315	778230	809364	771299	763091	1.00117e+06	766296	913001	941281	280871	513260	766494	652918	752742	428620	434687	809125	626985	675237
BML-LCMS18-5.06-540.163		452452	403088	400809	356217	380814	44554.9	78365.6	50882.7	43138.9	92654.8	70422.4	93993.1	62617.2	103647	105648	82747.2	152174	186691	102964	200732	492547	482077	540567	454085	471446
BML-LCMS18-28.92-530.612		451327	405492	432475	395714	435818	0	0	0	0	0	0	0	0	0	0	37996.3	113122	95850.4	72147.3	71722.7	246240	230739	333612	253466	267774
BML-LCMS18-27.29-642.3387		446539	417896	414098	399997	399167	0	0	0	0	0	0	0	0	0	0	344407	453801	428580	393388	354723	317088	256208	329417	269741	265389
BML-LCMS18-5.12-296.1492		445790	368792	359280	331391	341635	206087	300479	260257	317894	319943	386083	391635	277426	464576	510417	158085	136924	242851	117424	183202	447278	423962	479582	391918	415775
BML-LCMS18-23.37-578.3086		444495	317740	434284	574338	308160	4269.82	12476.4	5527.88	4196.92	13906.2	11254.2	14068	14007.3	20117.2	9849.65	486103	611960	392825	780515	783116	1.6014e+06	1.50788e+06	1.39785e+06	1.63114e+06	1.68967e+06
BML-LCMS18-31.3-430.2702		441401	452990	397759	354101	421669	0	0	0	0	0	0	0	0	0	0	29000.5	82600.8	73385	48529.4	47614.8	112755	86774.8	145613	118607	83502.7
BML-LCMS18-30.33-536.334		437328	405498	467665	568683	530996	0	0	0	0	0	0	0	0	0	0	157495	388936	319492	328657	357203	420193	336408	437156	354682	374631
BML-LCMS18-20.5-292.1308		428185	342554	412748	574656	336492	0	0	0	0	0	0	0	0	0	0	770983	553304	339934	812419	696078	1.26974e+06	1.17695e+06	1.2396e+06	1.31262e+06	1.38096e+06
BML-LCMS18-26.48-256.2397		427347	370004	362057	357015	347439	53599.1	38093.5	35194.8	31008.4	42026.7	127089	363702	548226	380551	216150	147487	164003	132355	186884	171405	301165	285157	369608	327324	330136
BML-LCMS18-23.68-542.2854		418758	299895	360174	519214	285585	0	0	0	0	0	0	0	0	0	0	270288	367972	226265	353452	443247	1.578e+06	1.52464e+06	1.48822e+06	1.56521e+06	1.84574e+06
BML-LCMS18-29.46-538.2914		411537	337034	430377	425905	438159	0	0	0	0	0	0	0	0	0	0	131336	235424	248826	230615	235932	370120	357471	481516	364519	394883
BML-LCMS18-25.41-340.1649		410239	376818	374353	326442	366450	0	0	0	0	0	0	0	0	0	0	67934.4	132427	105609	90789.9	90875.9	187170	156246	200088	166891	164119
BML-LCMS18-30.01-566.3235		408435	340411	331059	323179	332985	495536	333995	410731	348840	259634	5.13892e+06	3.65367e+06	2.26178e+06	2.43806e+06	1.98958e+06	713917	1.38005e+06	1.10108e+06	1.02903e+06	1.50116e+06	387076	426729	483463	475729	439317
BML-LCMS18-30.25-491.3217		406411	410741	463510	345721	393859	0	0	0	0	0	0	0	0	0	0	71906	157794	111872	105839	112479	114898	103835	136706	113716	118772
BML-LCMS18-15.87-440.3334		404700	119272	14064.9	6828.73	7823.7	455.27	176.178	321.474	486562	49112.7	484995	91130.9	14658.9	9947.08	5864.5	456254	32502.1	443374	76356.8	34347.9	90189.5	27241.8	14516.3	7332.38	0
BML-LCMS18-33.8-340.344		404233	402342	427584	410407	382131	214673	182112	270349	235122	202890	111740	324399	219522	147092	168205	419026	433332	453220	376615	480320	518155	420582	389851	320114	350577
BML-LCMS18-29.46-1060.599		403093	366139	375224	384887	395955	0	0	0	0	0	0	0	0	0	0	39673.5	143406	118567	118766	107137	270647	287845	413609	329352	332994
BML-LCMS18-25.24-560.3068		401264	330142	417034	358217	186843	0	0	0	0	0	0	0	0	0	0	735631	586923	372667	862869	862555	490518	271029	230829	542696	564254
BML-LCMS18-17.16-553.4175		389657	114518	11844.8	7818.4	6637.83	1667.16	905.527	920.889	468398	48748.4	465760	90235.7	12618.3	7952.87	5951.27	465080	31196.4	439337	79353.6	30213.7	85447.2	20895	10620.8	0	0
BML-LCMS18-31.11-874.3912		387853	370708	413060	341913	372374	0	0	0	0	0	0	0	0	0	0	99884.2	221997	220182	142839	147547	165377	154163	197410	166090	166682
BML-LCMS18-28.07-416.2562		387487	394862	513809	374064	440403	0	0	0	0	0	0	0	0	0	0	308716	627938	575114	502259	532943	194486	157671	191468	159116	166775
BML-LCMS18-2.52-330.096		386452	388044	398485	379234	415345	537505	467079	745119	673018	500089	443704	472273	380449	209331	199733	191467	314420	356149	225645	339374	450461	443894	548595	395056	465093
BML-LCMS18-29.75-514.2898		386225	399706	506567	295162	511211	0	0	0	0	0	0	0	0	0	0	31705.3	107885	106119	65334.7	66691.6	206017	178188	252549	201895	195122
BML-LCMS18-32.64-486.2952		383450	329359	300772	329135	270371	0	0	0	0	0	0	0	0	0	0	246278	188022	108938	176615	144384	130660	106713	161069	122660	176649
BML-LCMS18-11.18-844.2978		381300	358767	392986	349618	366089	0	0	0	0	0	0	0	0	0	0	57757	82824.6	64806.2	69713.3	69808.3	179419	169897	220743	201886	163048
BML-LCMS18-10.98-234.0895		378821	334759	373641	376124	336265	0	11508.4	0	0	10135.9	0	7211.64	8017.65	0	0	117738	174241	174816	139537	187104	219545	236706	310973	278050	267806
BML-LCMS18-21.00-634.2956		378547	432076	511963	677445	458577	0	0	0	0	0	0	0	0	0	0	241382	514316	410698	490585	511346	557586	517514	592685	557812	572443
BML-LCMS18-28.42-478.3269		376543	333817	314019	347165	323087	0	0	0	0	0	0	0	0	0	0	375744	299567	254897	368330	335602	390496	339809	445975	362409	368328
BML-LCMS18-31.29-256.2393		376538	382710	462648	440005	426105	287665	308564	279862	231739	209077	573734	1.06656e+06	891044	1.14649e+06	1.16769e+06	884788	1.00129e+06	1.08478e+06	1.07846e+06	1.18071e+06	596017	548815	666906	506032	498382
BML-LCMS18-28.67-629.3538		376409	529916	607997	518384	583434	89182.6	101274	130534	91016	95428.6	9.26305e+06	6.20721e+06	5.57123e+06	9.65867e+06	8.3497e+06	26024.8	29920.1	57090	21646.8	20331.3	172562	129949	189486	123118	121805
BML-LCMS18-30.13-565.358		372766	311750	305578	339843	277209	0	0	0	0	0	0	0	0	0	0	192950	195702	144376	199452	174515	355059	307794	376572	340370	341532
BML-LCMS18-15.06-606.1947		370538	343261	322799	302609	225036	10446.8	7553.79	12683.5	20159.8	11972.8	231671	297377	169602	23392.1	5419.39	251689	756389	632368	379915	575059	776983	713615	702896	699859	721895
BML-LCMS18-33.64-936.579		370354	406309	460898	403361	526505	27279.6	21028.2	20307.9	20610.6	18443.9	121784	466306	583005	397638	293874	63343.4	139211	133454	94837.1	176738	736411	660377	699386	522660	515580
BML-LCMS18-13.25-534.1727		369423	320363	395454	343041	320251	415587	446538	590307	504330	406693	264454	519297	476004	310356	306457	144144	384028	483930	222995	501337	516227	524209	548339	462166	479576
BML-LCMS18-31.28-434.3021		368627	334924	347288	340108	353282	0	0	0	0	0	0	0	0	0	0	166670	214108	169360	217026	191437	369249	338298	459387	363361	361217
BML-LCMS18-11.48-682.2463		368393	260722	341751	367324	302717	23545.4	35374.4	25929.4	29206.8	35429.7	29935.5	51836.4	42481.3	66961.5	63521.9	111485	217220	173794	162502	231000	289788	284842	322278	305680	272494
BML-LCMS18-25.36-576.2925		364488	298616	355486	481433	347420	0	0	0	0	0	0	0	0	0	0	434394	941668	481045	584484	556993	1.32144e+06	1.08761e+06	1.08328e+06	1.17361e+06	1.19316e+06
BML-LCMS18-27.77-511.4073		364198	337772	334972	334417	301504	357552	390717	374376	430699	396486	433045	385048	338982	383782	389935	534097	276773	336315	290626	345592	306866	256668	276445	217635	217204
BML-LCMS18-16.11-688.5103		358358	103232	7949.04	5201.35	4025.31	455.613	673.599	452.573	475803	42447.3	449745	71226.2	7937.18	4757.12	2996.03	363511	20932	363685	63248.6	21288.6	91337.9	21177.1	7589.84	3409.08	2904.47
BML-LCMS18-28.65-528.3065		356405	332717	322864	283844	334648	0	0	0	0	0	0	0	0	0	0	0	19369.9	17434	52102	16897.7	169450	35569	48627.5	158642	43149.1
BML-LCMS18-28.24-645.3504		356025	505896	614001	546023	562381	7030.57	11711.4	11584	10560.3	15050.9	656336	596898	574033	875590	609732	24337.2	63186.5	122899	36915.5	32872.2	227786	172845	251396	170751	150624
BML-LCMS18-29.22-262.228		355445	423018	415700	401142	495986	20806.2	11831.7	3277.49	1506.87	3873.61	21701.3	17877.4	18492.4	25966	22059.2	19359.9	49742.8	48132.9	29230.3	27385	143366	125309	180442	140844	134457
BML-LCMS18-37.47-1000.589		355201	513197	892698	1.09647e+06	1.37187e+06	0	0	0	0	0	0	0	0	0	0	155821	891028	575604	680710	876020	158992	147921	232718	195173	197346
BML-LCMS18-10.10-538.2051		354404	313350	389331	398537	298362	582196	581045	866556	852495	555781	1.52544e+06	2.5064e+06	1.52376e+06	893811	813012	209203	430233	397676	270608	477857	586491	511324	735019	754929	566876
BML-LCMS18-10.09-560.1863		352936	300730	312701	311536	291041	503535	501921	801009	743330	464714	1.31293e+06	2.19458e+06	1.26111e+06	687559	638832	149210	416994	357718	223018	402516	546830	465124	690424	567257	547219
BML-LCMS18-27.04-486.2627		349871	292134	309995	49232.4	36411.8	0	0	0	0	0	0	0	0	0	0	45802.8	254064	163237	126668	113504	124208	94733.7	110658	103199	106449
BML-LCMS18-32.29-712.3601		348096	293033	400938	484427	481390	1.66193e+06	1.09528e+06	1.67352e+06	740559	874933	6.78204e+06	8.36358e+06	2.80691e+06	2.05962e+06	2.4213e+06	655455	1.7183e+06	1.71246e+06	1.26015e+06	1.78289e+06	698343	646497	825432	702998	756095
BML-LCMS18-34.86-914.5947		342796	415800	538619	647482	950608	91527.1	69086.3	71930.3	62011.6	48312.4	171394	827585	1.19904e+06	1.1525e+06	672182	168456	431502	405591	333154	612283	1.15961e+06	910656	1.15811e+06	902927	954424
BML-LCMS18-2.38-402.1546		341865	255357	254704	242868	151354	144737	233495	165944	202500	204873	245179	309305	296437	470085	398786	143085	128105	129430	112760	199832	227775	294533	253583	264114	263861
BML-LCMS18-15.39-581.4119		341383	95537.2	9817.73	6848.26	5388.81	877.374	775.855	641.446	472923	41741.8	445086	77211.9	12442.9	8314.52	6655.23	423869	25761.5	401089	71513.6	27665.8	84392.1	22821.9	10851.8	5325.97	5348.06
BML-LCMS18-28.56-490.2938		340942	341546	340221	332133	342421	0	0	0	0	0	0	0	0	0	0	117572	137510	109075	136156	120271	208926	175907	229062	182828	188361
BML-LCMS18-11.48-704.2282		340263	299224	321932	349245	287022	20220.3	38875.7	25160.9	20092.2	36646.1	27766.1	44581.6	39849.5	57717.4	56817	90927.2	160708	151897	110328	167888	283167	164437	305440	286494	260650
BML-LCMS18-36.9-996.5526		338836	321108	321555	321948	459261	0	0	0	0	0	0	0	0	0	0	24574.7	53377.6	45161.1	35453.7	53155.6	112915	102962	143323	110755	109735
BML-LCMS18-27.25-521.3444		335554	281915	394957	488200	275118	13121.8	7330.03	3168.42	4855.23	4405.44	38043.9	147232	37134.9	29915.6	56691.1	194212	241177	186775	204444	198103	389038	318459	491095	371341	341781
BML-LCMS18-4.64-421.0229		330206	407291	391561	422809	413505	181794	199471	150469	141746	201291	132202	225700	168645	158561	152731	278378	545679	816946	652189	785642	318190	320761	597073	465489	484684
BML-LCMS18-18.07-666.5026		329648	97642.7	11875.9	6971.22	5690.74	1190.68	988.291	991.083	407306	44196.8	401820	82400.5	12948.8	6780.11	4742.47	392246	26154.9	369333	65655	28420.3	75225.9	20533.3	10727.4	5552.98	3826.26
BML-LCMS18-29.4-354.2759		328974	368372	359410	331476	347234	253838	156882	83092.3	65836.5	92693.4	419875	336307	281813	274020	225306	153803	208206	166109	165452	181232	176091	166342	230886	175155	154781
BML-LCMS18-26.38-464.2765		327096	316966	325391	316419	327574	0	0	0	0	0	0	0	0	0	0	1.01742e+06	786663	532965	1.25079e+06	1.12808e+06	320099	256704	287223	274404	288761
BML-LCMS18-13.82-468.3266		325033	88945.8	8198.27	4176	2358.6	2384.04	2281.75	910.133	448712	38252.2	405760	58304.1	6621.32	4488.47	2894.28	378553	20056.1	367793	57236.2	18509.6	68053.4	18069	8242.93	2198.12	2895.14
BML-LCMS18-27.85-555.4337		322700	305581	300102	300484	276346	332661	351893	345691	386344	346969	421485	368011	330775	357232	364869	470972	233983	294908	242226	292131	262889	235367	276800	215472	202521
BML-LCMS18-11.04-355.2446		321164	90105.8	9831.46	6446.67	4623.75	1052.57	563.526	1770.52	454203	35347.3	388463	59907.8	7649.78	3369.85	2539.93	372756	25322.2	365788	57632.6	23907.6	70623.6	21487.2	9836.14	5616.09	3239.66
BML-LCMS18-17.67-914.6752		320030	100611	12202.5	6608.38	7023.6	2314.66	2526.39	2274.97	443410	47905.9	434832	86265.2	8789.37	0	0	373482	25596.7	351415	66926.7	30481.6	89466.4	23895.7	10117.7	3935.36	4096.93
BML-LCMS18-28.26-504.3047		319011	355048	306245	300685	296995	0	0	0	0	0	0	0	0	0	0	71453.5	130414	101782	99203.3	106360	246826	218259	277846	243060	239100
BML-LCMS18-26.61-268.2035		318738	299957	318002	279784	299626	15486.8	12375.9	22589.9	29470.3	14384	49204	12446.7	6600	16129.2	21216.9	239878	185065	140086	220275	220280	140919	141811	161256	153788	158486
BML-LCMS18-29.56-640.3257		317842	311682	315667	301460	288056	25087.9	34337.2	33702.7	27427.5	25663.2	19229.7	33418.1	26723.8	21706.1	18603.4	381930	283292	218922	340333	317386	225132	223379	248979	216197	232425
BML-LCMS18-6.71-538.2049		317002	296566	291660	307840	297676	19687.6	35369.7	27902.4	22354.6	35970.3	138523	230117	158890	102138	86310.9	63531.9	165217	148398	86755.2	187161	389870	441040	397246	409900	409594
BML-LCMS18-5.84-356.1103		308957	295721	230354	190105	299982	163953	453947	847147	461539	452840	120776	357453	390694	255133	321387	1.14161e+06	2.46097e+06	2.03741e+06	1.75462e+06	2.66595e+06	2.51573e+06	2.94166e+06	2.21836e+06	2.52814e+06	2.36861e+06
BML-LCMS18-32.05-1046.556		307256	237824	265750	287569	280349	0	0	0	0	0	0	0	0	0	0	71460.4	237517	100382	148145	99759.4	497869	466496	543588	637398	616994
BML-LCMS18-17.38-785.6004		307143	95587.8	11162.3	8323.57	7007	1146.31	1327.35	1996.99	421909	47212.6	389004	87486.8	12735.4	5635.63	4537.43	326139	21363.6	309268	57062.2	20407.3	83704.2	23507.6	8310.09	5827.29	4329.82
BML-LCMS18-26.62-479.288		303414	289708	309952	260757	284421	0	0	0	0	0	0	0	0	0	0	190713	185779	119145	207861	191071	153251	136626	160484	150660	147057
BML-LCMS18-29.69-568.3168		300992	249408	852994	893437	319598	294248	372439	450765	325240	422502	225492	402577	234699	129326	68655.7	139825	131939	28935	87059.3	14596.8	304894	188699	377301	280299	172296
BML-LCMS18-31.75-454.3122		297837	298420	275757	279528	300230	0	0	0	0	0	0	0	0	0	0	176862	155527	180807	124498	122126	181018	164853	221604	181840	164969
BML-LCMS18-28.93-352.2602		296700	294587	307270	292979	295889	13961.9	22774.1	23206.7	17961.2	25890.9	0	0	0	0	0	83187.9	138950	153284	115657	124766	243919	216697	291335	213522	225361
BML-LCMS18-21.51-386.1768		294288	214710	36424.3	247681	86801.6	57125	26447.6	63878	162683	90656	177867	205357	42927.7	35733.6	22336.8	300523	57791.1	133369	75259.2	77879.6	160896	75316.4	48442.5	26780.6	28264.4
BML-LCMS18-29.67-538.2936		294064	258963	251104	230382	240767	11917.5	17798.1	13206.3	11109.9	13996.1	0	0	0	0	0	214356	197729	176640	234296	236209	291976	270558	337528	283833	288363
BML-LCMS18-20.35-560.2971		293685	237466	280480	361875	201600	0	0	0	0	0	0	0	0	0	0	230226	210172	157090	278759	260741	697034	629381	619857	734726	754519
BML-LCMS18-38.35-906.5832		291699	243862	283955	295975	339474	0	0	0	0	0	0	0	0	0	0	0	0	0	0	0	26533.1	24339.5	44967.7	27252.7	27690.1
BML-LCMS18-9.72-520.1948		291157	220648	230300	255833	217870	131842	144797	240184	205623	139109	808840	1.56046e+06	1.24996e+06	521018	410524	116655	348983	289800	173784	359101	509425	517712	543250	569479	526343
BML-LCMS18-8.33-148.0553		290217	408465	429889	397655	517819	108736	258476	189018	91555.1	100336	834660	483244	369984	205291	104301	25408.6	20142	35353	127519	96452.3	0	0	0	0	0
BML-LCMS18-34.86-931.6213		289123	342806	437348	509309	708361	76457.9	55586.9	64387.5	58102	42018.8	147512	639299	836731	804885	519520	128546	324752	311105	254953	459825	841333	679869	893295	672465	711128
BML-LCMS18-16.98-801.594		287455	98804.5	10049.4	6361.59	5600.55	939.269	962.439	1177.85	351336	45727.4	334975	72308.8	10235.4	6545.86	5739.4	313149	19546.2	304936	65417.2	21295.1	84924.9	24280.4	8439.9	4406.03	3650.99
BML-LCMS18-31.84-654.3761		286308	290518	325986	268915	311688	0	0	0	0	0	0	0	0	0	0	259384	289191	222403	261003	265162	215766	220837	290505	237149	201938
BML-LCMS18-28.57-668.3555		284797	249536	257579	238678	230199	0	0	0	0	0	53975.1	43547.5	74289.5	38353.5	30123	73542	86947.3	96891.7	95880.1	99164.5	167601	150248	186854	162111	158618
BML-LCMS18-28.77-508.3119		283133	242668	253598	291144	223835	0	0	0	0	0	0	0	0	0	0	198271	138646	94142.7	153228	134559	216090	181030	232497	206715	205334
BML-LCMS18-5.02-546.1272		282080	333076	301384	306553	121390	196598	239111	206347	208043	223351	209010	292730	213456	283275	276475	134734	257734	398115	282029	390824	99720.5	251220	194126	370874	357007
BML-LCMS18-16.6-698.2559		281900	276857	293873	267002	281320	0	0	0	0	0	20304	21792.5	20874.3	10927.6	9682.28	67153.8	163224	161368	89552.1	112882	304472	335790	321441	281324	267902
BML-LCMS18-19.63-536.2055		280299	284141	278623	258839	267920	0	0	0	0	0	0	0	0	0	0	49238.7	74458.3	66387.2	51087.3	56575.7	132202	121422	141806	110376	112834
BML-LCMS18-27.14-540.2693		279797	238257	238137	238926	256582	0	0	0	0	0	0	0	0	0	0	18926.1	50352.9	47823.1	30711	33902.8	185336	167998	213944	166262	168865
BML-LCMS18-30.76-626.3454		279293	258395	255511	246534	265963	0	0	0	0	0	0	0	0	0	0	247897	344739	266284	292389	285596	202836	175966	230890	202236	197935
BML-LCMS18-25.1-504.2703		278739	288316	361780	244425	358134	0	0	0	0	0	0	0	0	0	0	501779	726595	533074	643657	528861	163290	108296	102728	116568	92016.7
BML-LCMS18-30.27-478.3153		277377	285077	321905	356825	373258	1329.08	4203.12	1557.9	2062.3	1221.01	0	3647	10627.7	6365.5	461.082	109181	178188	97456	216088	193893	289312	232675	307985	226690	248169
BML-LCMS18-28.58-690.3381		276064	247412	247987	230124	233301	0	0	0	0	0	0	0	0	0	0	58352.8	90735.9	99412	76287.5	92147.6	164485	153371	184782	163692	162354
BML-LCMS18-23.59-446.2662		275897	238714	248885	227668	249629	0	0	0	0	0	0	0	0	0	0	108221	182166	143136	149314	143502	135950	119722	154036	127593	128250
BML-LCMS18-33.03-498.2919		275190	276001	246906	240662	277449	0	0	0	0	0	0	0	0	0	0	68152.4	98702	96933	76401.4	78875.4	123841	97445.7	145887	103561	108903
BML-LCMS18-35.56-574.4931		270742	357774	375126	506060	649518	198834	218680	217112	194754	219638	100888	259143	255389	247472	175719	133316	304572	265190	209112	353996	295746	218402	338926	270280	267321
BML-LCMS18-27.93-599.4599		270461	251690	264761	264614	241702	280459	282565	282435	317982	288168	352164	317317	266312	288054	299436	404298	193504	244755	203792	242342	246568	213228	250357	198128	197807
BML-LCMS18-8.05-362.1850		270182	226273	248107	221542	243793	283154	495635	386860	340026	565724	362319	312159	196268	68783.8	70490	34210.6	103146	82610.2	40716.4	107089	280140	298635	290544	257984	229579
BML-LCMS18-18.8-757.6042		269969	86099	12683.3	6769.49	5996.96	1273.33	1563.03	1085.91	303808	36627.1	325430	77324.3	11371.2	5280.86	3533.9	254977	19114	243917	46928.5	18994.8	65700.7	20074.5	9691.07	4217.82	3395.77
BML-LCMS18-8.94-538.2042		267043	197680	235497	235262	197063	6097.83	12679	15240.4	12432.1	13251.4	197496	266568	284191	134960	114440	42678.5	133658	112813	67458.5	106408	309720	371637	273714	364083	345829
BML-LCMS18-24.54-462.2612		265589	261044	348558	230057	271464	0	0	0	0	0	0	0	0	0	0	83219.3	210491	168945	119603	139097	97623.8	92566.6	120296	89315.9	93895.4
BML-LCMS18-13.38-699.2721		265457	243454	243896	242517	256206	0	0	0	0	0	0	0	0	0	0	15584.2	24197.5	19836.3	16290.9	18856.8	126760	119369	161833	125831	118886
BML-LCMS18-7.47-386.1912		264368	231552	232704	248306	231621	499716	939518	755368	639326	928405	665336	1.65141e+06	2.32283e+06	3.72165e+06	3.79639e+06	377001	436297	495216	431336	747022	566120	644220	512358	548732	562104
BML-LCMS18-23.64-404.1827		263572	191442	239446	302461	181916	12094.1	29064.4	11288.6	8272.63	18440.4	0	0	0	0	0	374858	258617	186676	360570	328808	549571	505331	557038	531698	534573
BML-LCMS18-23.7-414.2052		262161	272596	143562	215244	157704	149289	187643	157001	218233	162154	248362	338908	177052	188524	216682	274270	139768	188968	126321	158003	182957	120119	141601	73096.3	93146.6
BML-LCMS18-30.25-294.2065		260221	276806	345813	264149	311563	96743.5	137677	198987	126117	156558	345154	408600	223414	133339	72559.7	55780	69377.2	76201.5	50468.9	63590.2	166188	152004	175240	134649	154602
BML-LCMS18-28.13-514.2912		259964	240780	128437	205497	228506	0	0	0	0	0	0	0	0	0	0	73750.2	49148.1	51738.1	65989.8	56572.1	85813.2	80638.3	132829	87321.2	109282
BML-LCMS18-30.55-536.3348		259477	217168	244702	242295	249198	0	0	0	0	0	0	0	0	0	0	434040	395429	286816	394286	450649	302029	240222	302039	265850	290888
BML-LCMS18-29.58-292.2021		258724	250451	278046	244239	285045	610393	734886	900656	783431	828373	462679	725742	459515	326382	169767	106997	145543	155177	90435.5	139330	301480	261033	283489	221893	271695
BML-LCMS18-26.69-434.2451		257549	310621	396657	350363	344984	366302	414449	466823	362416	347504	733760	825371	405443	494562	931873	46797.2	74057.5	83341.7	46302.4	47765.7	95893.2	88619.6	116376	80719.4	76787.8
BML-LCMS18-29.93-549.5363		257266	241055	248138	240669	254832	0	0	0	0	0	0	0	0	0	0	31007.7	58025.2	39134.6	58104.7	41963	185230	168319	232617	196481	204510
BML-LCMS18-15.24-655.5368		257241	69823.8	7767.48	4897.38	3820.47	1038.8	425.008	517.323	340331	29340.6	298404	46617.6	8429.18	5027.29	4762.03	261320	16924	233262	40933.9	15814.8	51186.5	13887.8	9364.22	3976.79	3108.94
BML-LCMS18-27.97-465.3076		256829	283588	312075	214846	316857	0	0	0	0	0	0	0	0	0	0	184727	386862	312096	299313	273511	114326	82519.7	83640.7	83308.7	85867.3
BML-LCMS18-26.13-544.3039		254092	203475	219485	288888	253409	0	0	0	0	0	0	0	0	0	0	283661	465119	250879	388614	337311	1.15245e+06	1.16891e+06	1.20624e+06	681588	1.37688e+06
BML-LCMS18-29.57-298.1911		253418	265595	302137	235932	304514	1.30158e+06	1.61405e+06	2.12837e+06	1.52166e+06	2.02216e+06	737991	1.48504e+06	667813	346611	121220	28428.8	30418.9	34108.6	13004.8	23560	315279	268144	267356	203569	279694
BML-LCMS18-27.14-500.2766		251759	231500	243091	202033	230499	0	0	0	0	0	0	0	0	0	0	13888.1	38996.3	29502	26578.1	23070	138078	113551	146608	116825	113157
BML-LCMS18-30.43-356.2909		251325	262109	294152	226185	283080	57712.3	43504.3	16511.7	13382.6	20590.9	37061.8	56896.2	60440.5	85533.7	66241.1	84573.9	93737	83800.3	87391.4	83270.8	236168	215864	299409	246196	222900
BML-LCMS18-17.43-554.2153		250522	289815	263824	254926	250847	9528.4	8405.19	11630.4	33685.2	10701.5	4695.3	8209.97	6493.76	909.312	533.44	102212	131827	84173.8	94794.9	100899	140084	130597	157085	136348	134147
Robustaflavone	biflavonoid	248291	98710	75226.9	122316	111035	43245	40577.5	29678.1	32616.4	33046.6	92242.8	247630	296655	251998	307089	323013	523479	297292	435891	597222	362553	309949	347010	296437	327830
BML-LCMS18-9.33-388.2103		247949	188797	184511	214221	209520	14048.9	19811.3	21788.2	23513.5	19268	495007	1.35892e+06	1.67811e+06	1.90485e+06	1.35151e+06	44356.1	49441	76162.6	50820.1	68880.1	294083	309583	304358	270419	278878
BML-LCMS18-17.92-785.5694		247949	91220.7	13716.2	9628.42	8389.32	249.443	466.876	820.269	247104	44456.1	308252	92415.6	16012	8949.48	6604.68	245961	30781.5	254217	64088.8	34195.5	71647.6	23240.8	13091.7	4732.99	4258.15
BML-LCMS18-16.17-768.6212		246534	69955	10410.6	4538.07	4957.35	1169.87	1050.3	870.652	315402	32214.2	291987	51235.8	8258.95	0	0	280494	17424.4	258274	42097.8	19778.3	50984.4	16141.7	8616.13	4439.91	4020.19
BML-LCMS18-26.57-495.328		242606	236158	340219	473344	238590	15760.1	10015.9	12085.8	13149.1	13454.8	49578.9	88862.6	41215.9	35812.2	52905.1	199575	241710	212646	204212	207358	429563	366141	613930	361118	382630
BML-LCMS18-30-404.2545		241032	239267	250318	210937	220409	0	0	0	0	0	0	0	0	0	0	72686.3	88735.1	98713.4	88409.2	81375	117659	119674	152443	124584	112744
BML-LCMS18-37.19-778.5579		240492	319149	387778	391044	575447	47522.3	70782.5	44236.1	57569.4	73243.2	40736.4	140064	225737	493211	533215	100331	215452	206466	239232	317941	135582	103087	136324	109864	116918
BML-LCMS18-27.13-278.1521		240315	155717	118524	133494	117218	132185	156800	144918	346793	135270	392864	181493	173789	160093	153845	280372	102092	269011	94613.6	103133	128430	129147	113950	115375	90349
BML-LCMS18-28.38-491.3184		239597	235153	240911	198502	224213	0	0	0	0	0	0	0	0	0	0	123011	123835	111655	130456	122407	141506	146110	171486	134978	134520
BML-LCMS18-29.4-683.3664		239231	233307	238684	192431	209903	0	0	0	0	0	0	0	0	0	0	17321.2	36681	39981.5	32414.8	21957.3	89124.1	91120.6	109969	89545.4	94127.8
BML-LCMS18-28.04-284.2708		237177	222176	207369	217092	225622	0	0	0	0	0	0	0	0	0	0	69635	90241.4	66143	95681	87618.9	220588	194943	265917	195756	189778
BML-LCMS18-9.71-555.2310		236098	180698	185834	199751	189103	110164	114727	187187	160056	109771	704466	1.32482e+06	969476	412182	292353	83505.8	282687	232056	140133	277170	464432	451524	469485	468878	425419
BML-LCMS18-25.36-194.0569		233368	195624	360864	304774	205807	0	0	0	0	0	0	0	0	0	0	428166	723035	404839	611625	538682	964357	716027	674436	749183	801058
BML-LCMS18-27.85-660.2914		232993	220222	237682	201277	212294	0	0	0	0	0	0	0	0	0	0	54031.9	82236.9	121989	68815.1	73001.7	94379.2	86773.2	112638	91021.7	89693.5
BML-LCMS18-12.35-286.1384		232530	195636	208715	291099	183152	0	0	0	0	0	0	0	0	0	0	283019	319896	211260	428843	377943	634720	643152	624449	669872	728006
BML-LCMS18-28.12-554.2837		231188	215019	206088	208974	199834	0	0	0	0	0	0	0	0	0	0	15952.5	38488.2	39130	24389.9	29183	144021	125295	171944	126410	129647
BML-LCMS18-27.68-467.3813		227568	208489	219011	218769	192602	261843	281635	272541	304536	279695	289275	251923	232965	260523	288595	376099	192134	236856	196209	230698	201817	153811	188845	155257	156635
BML-LCMS18-22.69-536.2081		225820	237246	240024	223911	224816	0	0	0	0	0	0	0	0	0	0	27158.3	69860.4	55816	35292	29327	94554.1	67897.2	107515	76095	62829.5
BML-LCMS18-29.47-545.5048		225300	211141	229550	233708	246122	0	0	0	0	0	361.044	2543.68	835.073	639.028	505.998	38584.7	101001	84707.3	90362.3	89290.7	222238	179665	235416	196062	210310
BML-LCMS18-39.56-888.5718		224889	232474	311570	245906	485274	0	0	0	0	0	0	0	0	0	0	0	0	0	0	0	25708.7	22805.3	54573.5	39589.7	32954.7
BML-LCMS18-21.57-568.1012		223691	62993.8	22105.8	31912.4	37172.4	47633.4	67429	54319.2	52303.7	58975.2	44933.6	131312	160792	206884	257580	214603	223332	174379	222169	267524	161767	149154	194413	156964	160508
BML-LCMS18-27.43-98.1099		221952	206456	217346	188744	202231	0	0	0	0	0	0	0	0	0	0	28692.4	53647.3	38951.9	43640.2	38613.3	86634.3	88642.5	107855	99705.8	92238.6
BML-LCMS18-41.34-683.1958		221874	113016	47249.3	66279.9	43004	386439	2.3835e+06	536902	598858	294901	70379.7	832294	671672	168098	61374.4	953775	1.46589e+06	1.45922e+06	1.20986e+06	1.53132e+06	112562	44529.3	53373.2	34974.3	43392.1
BML-LCMS18-12.02-536.1892		220404	193938	224252	199645	190552	1.34685e+06	997477	1.45369e+06	1.99154e+06	1.02957e+06	194477	193592	116686	67534.9	68723	28259.4	59928.2	48126.5	36470.5	60317.2	230736	213004	187785	196158	216141
BML-LCMS18-25.13-486.2592		220098	266952	334988	233851	323400	0	0	0	0	0	0	0	0	0	0	255320	620799	480166	444176	462651	128232	84486.4	99137.4	81351.4	97235
BML-LCMS18-25.79-394.264		219780	157441	176810	231506	132484	4632.61	11120.8	4905.48	5462.85	8158.03	0	0	0	0	0	500987	366397	184985	496773	414881	651599	594771	592604	708558	674601
BML-LCMS18-28.39-428.2567		219532	215863	239721	197878	213365	0	0	0	0	0	0	0	0	0	0	35327.9	84500.3	60747.3	53677	59783.1	92729.5	81668.1	101473	89361.7	93553.2
BML-LCMS18-27.98-488.2743		219426	217671	237475	200307	228973	0	0	0	0	0	0	0	0	0	0	200279	236500	210881	230739	224665	151240	107611	133129	118669	124759
BML-LCMS18-12.64-544.1923		216743	219350	233512	241387	215550	734285	631615	857313	1.01944e+06	616490	316523	355468	261800	133449	130997	57702.4	127095	120383	83159.2	135222	280828	298198	300097	274545	287674
BML-LCMS18-15.93-636.2793		215979	241797	259821	217045	247620	53418	45686.8	58561.3	49601.2	25398.5	257174	301281	413015	428408	835109	105945	254381	414108	153989	205571	1.20273e+06	1.14941e+06	1.1996e+06	839341	997127
BML-LCMS18-35.61-834.5187		215471	254575	292115	393674	392672	126190	136334	148036	133053	134819	146853	209970	278716	329474	250188	85484.1	169577	162664	124390	201529	201074	163797	246242	175171	177082
BML-LCMS18-12.62-1062.3680		212539	162318	143880	167886	155828	10471.1	8980.94	19301.5	12436.6	8064.31	418551	720767	381110	58873.9	18701.6	5649.16	49311.7	30108.6	12543.3	41834.8	361819	386969	359764	409094	407231
BML-LCMS18-12.22-451.3505		211334	57962.7	6855.19	3795.23	3072.24	646.82	615.789	502.435	258419	18977.6	247665	32755.3	5837.64	3176.04	2670.62	233386	15082	227008	35380.2	16162.9	39319.1	10828.7	6124.62	3079.22	2304.41
BML-LCMS18-10.18-342.1120		211109	176872	180750	173675	167933	175307	164776	193170	244613	153589	352872	580538	580701	418202	384806	104430	175358	220251	168565	263684	317215	320532	327305	316695	322458
BML-LCMS18-33.93-713.5451		210923	234644	302562	280148	326458	361152	540707	410832	412562	406029	289437	354012	350832	367374	397055	206816	308455	284893	239207	302677	237696	189212	241681	191276	206034
BML-LCMS18-10.16-342.1125		210824	176576	182894	175354	169878	175307	164776	192388	244613	152420	353028	579052	579201	417002	384806	105011	170325	217874	166372	263121	312031	320732	327653	316764	322580
BML-LCMS18-12.38-544.1923		209188	739106	798954	747570	709767	277692	14960.3	423729	417117	169659	1.44598e+06	1.03004e+06	462258	33041.1	24732.2	27563.5	61327.7	42947.4	38999.9	71042.8	35888.5	42454.3	36570.2	36840.5	36482.4
BML-LCMS18-12.69-340.1344		208532	170483	178701	177346	170192	66131.2	54498	94207.2	88016.6	53085.4	296001	463706	306859	108247	76038.2	52282.4	168146	154938	87575.9	158474	346292	353845	362000	363837	348785
BML-LCMS18-36.41-837.5613		208373	242143	279398	437592	503211	126065	201771	192696	168889	176578	473021	646624	1.10444e+06	1.31892e+06	1.047e+06	2078.68	416097	732792	148044	434319	605263	447461	632170	456989	523353
BML-LCMS18-9.98-438.1164		208267	243153	236308	222305	207989	157077	390362	233483	225315	326536	630371	1.06495e+06	3.21634e+06	1.97938e+06	1.27565e+06	254816	494550	580103	414053	673860	2.832e+06	3.0977e+06	1.98443e+06	3.01939e+06	3.54267e+06
BML-LCMS18-38.17-905.5948		208184	202710	177248	206043	226448	0	0	0	0	0	0	0	0	0	0	0	0	0	0	0	17885.7	16463.4	36798	22048	18042.2
BML-LCMS18-4.24-484.1627		205112	166914	178017	170800	142333	36151.2	72448.1	57515.8	51827.8	59545.8	97029.5	219472	366219	389272	370323	40894.1	85899.7	101452	94020.2	189244	359967	481309	352273	408256	456043
BML-LCMS18-28.38-122.1059		204801	206871	220815	182408	202331	0	0	0	0	0	0	0	0	0	0	7725.35	70926.2	40495.3	40871	31288.9	76108.5	67831.6	95547.8	83419.3	78568.6
BML-LCMS18-30.85-434.3026		203228	183252	184126	148540	166382	0	0	0	0	0	0	0	0	0	0	29079	17006.8	13443.3	16914.7	18505.3	146274	154026	201055	164707	161377
BML-LCMS18-35.48-368.3758		202557	256113	303013	341386	359018	134315	131770	187405	147847	166718	51142.2	217343	155385	118135	138639	202391	296243	301006	284534	384888	265102	227105	250674	201915	227105
BML-LCMS18-31.73-888.567		202227	183225	192866	182547	199827	0	0	0	0	0	0	0	0	0	0	12538.2	19348.6	13711.7	20527.6	16560.2	114723	105283	139745	120214	124441
BML-LCMS18-7.65-224.0704		202210	181933	213930	198806	132190	0	0	0	0	0	20508.9	17662.3	17954.1	17824.9	6655.5	33528.7	45262.3	150870	56085.3	72898	207542	227061	207036	217094	188136
BML-LCMS18-23.86-595.3324		201799	159999	161607	239672	111273	0	0	0	0	0	0	0	0	0	0	417105	218160	135824	402430	347485	742375	681679	631927	794011	770633
BML-LCMS18-30.84-476.3127		200895	170659	187973	273630	247582	0	0	0	0	0	0	0	0	0	0	211608	273830	223078	296714	284755	242028	232319	292478	253465	306954
BML-LCMS18-12.80-706.2463		200276	212867	235100	200721	171134	223445	370212	248499	252331	382811	210751	364127	287517	258288	295975	162942	247147	352939	248855	389094	453320	529625	577681	399482	478868
BML-LCMS18-12.68-374.1372		200141	198594	206084	190534	177902	595284	455188	699936	875365	478384	193006	193384	128745	63610.8	55770.8	22387.9	59801.8	48249.6	32689.4	68073.7	224554	225294	214004	206956	207649
BML-LCMS18-16.81-864.2055		198626	140183	143823	126821	153263	0	0	0	0	0	87418	222671	173706	87591.1	81875.4	935258	946136	854702	915974	1.26379e+06	260671	229465	236073	220894	230023
BML-LCMS18-34.08-390.2734		197092	199908	176724	241640	245114	32878.7	27936.3	31709.8	19872.4	23768.2	19492.3	17743.3	23511.4	41213.5	41734.7	118519	176965	123672	168124	166532	190071	165711	215084	185293	192485
BML-LCMS18-30.09-607.3706		195363	255875	317859	283562	307707	55819.1	89609.8	95475.6	58117.9	60494.4	6.05775e+06	4.72247e+06	3.91078e+06	7.17855e+06	7.89448e+06	93644.5	112827	182925	101381	119529	81888	61573.8	85955.5	62455.9	62673.3
BML-LCMS18-29.17-282.253		194348	206713	192256	163176	228315	0	0	0	0	0	0	0	0	0	0	65369.6	94487.9	76982.7	94297.5	90343.9	86090.3	77076.9	96397.8	79513	80344
BML-LCMS18-32.49-712.3603		193861	223406	316923	311650	296800	948210	538148	791637	303253	414158	4.95615e+06	6.88292e+06	2.38254e+06	1.8558e+06	2.29365e+06	496090	1.52367e+06	979280	943605	1.48791e+06	362264	362299	453771	400404	449905
BML-LCMS18-25.04-478.2583		193281	185688	200986	190101	193320	0	0	0	0	0	0	0	0	0	0	1.04236e+06	359107	159963	829881	700449	161155	142827	145400	158909	162553
BML-LCMS18-14.97-738.2483		192579	188614	193488	183722	179450	7050.92	5739.39	9538.72	11892.3	5821.02	47820.1	80965.8	60690.1	30020.6	25094.7	73100.3	191175	172168	107932	174175	265494	296595	307391	274962	275864
BML-LCMS18-25.96-626.319		191920	149095	153401	227419	189082	0	0	0	0	0	0	0	0	0	0	98049.8	394254	239736	248979	224556	732722	712394	741514	790342	783273
BML-LCMS18-36.75-920.5637		191651	203850	205155	203835	234329	0	0	0	0	0	0	0	0	0	0	93700.5	182681	133780	151163	163609	68585.6	57920.5	99131.3	71179.5	69912.6
BML-LCMS18-38.36-923.6079		191246	187880	175264	184570	214637	0	0	0	0	0	0	0	0	0	0	0	0	0	0	0	16965.2	13666.4	30247.4	16243.6	15024.7
BML-LCMS18-5.15-731.1927		190993	203108	195762	185820	187768	362072	191561	440999	439832	237597	559261	414968	472997	67409.9	410105	27646.6	73652	101948	72032.1	109211	163285	162361	245116	206079	220452
BML-LCMS18-28.24-628.3227		190104	266698	334968	306905	290623	10996.5	13654	18112.8	13692.7	21662.1	453015	461089	439088	683040	472024	26898.6	53813.7	95240.5	32327.2	36589.6	139172	102492	151524	88900.3	88596.5
BML-LCMS18-25.94-364.2035		189755	199287	246624	198747	277846	36324.9	39570.9	32214.1	38962.2	32012.9	571185	599640	692900	973328	735827	101028	66933	54478.9	115845	117884	293600	252854	333963	271064	262916
BML-LCMS18-17.34-620.2832		189252	177589	154425	153365	179754	191050	381510	264354	386040	208301	204187	54785.6	29830.3	109234	107594	10214.4	131172	77653.6	41050.1	54003.2	380412	361941	359437	328940	291862
BML-LCMS18-26.22-538.3139		188809	182945	180715	170844	183127	18314.1	34953.5	19750.5	15764.6	27395.7	10830.7	15885.7	22294.3	48391	49422.9	38277.6	60062.2	57173.2	48025.6	41352.5	111373	90246	117779	99449.2	92730
BML-LCMS18-26.81-532.3032		184962	143920	148227	150492	140520	0	0	0	0	0	19716.5	47486.7	33034.7	61446.4	56803.1	31767.3	56398.7	80282.2	30740.8	50767.2	60375.5	58241.7	83964.1	64595.2	63884.9
BML-LCMS18-25.24-520.3244		184413	121801	188295	199633	104532	0	0	0	0	0	0	0	0	0	0	202490	138838	93354.3	274393	257511	139048	118697	142997	136735	123313
BML-LCMS18-12.68-338.1166		184253	164420	165706	168396	150833	520971	383787	611664	761920	403154	179248	179579	119866	54380.6	45179.9	16017.8	42075.6	37707.8	22907	52458.2	196025	201757	193789	188923	183751
BML-LCMS18-28.82-450.2975		183757	193154	163894	194308	181465	0	0	0	0	0	0	0	0	0	0	47478.1	28478.1	28637.3	38261.9	33399.3	173260	164340	205572	167898	175915
BML-LCMS18-25.72-582.3406		182654	161445	172404	149037	153828	37691.6	17324.9	14106	14807.8	17025.2	27284.9	99496.5	23153.7	24052.2	62017.7	46840.2	47912.3	27928.2	38951.2	39522.5	64050.4	50801	93068.9	50731.3	42168.3
BML-LCMS18-28.42-598.4009		180886	189716	187816	151847	190678	30270.8	22394.2	20291.4	32635.6	17205	584498	903530	810618	784703	799328	9688.86	18216.5	18282.4	15355.3	28783.6	87099.5	91784.1	104108	82283.1	74006
BML-LCMS18-26-519.3293		180849	166142	184412	185598	154619	40023.7	25979	17535.4	14861.1	14095	46443.4	108821	22138.4	19389.1	41121.2	92234.9	40798.2	68854.4	59322	39381.1	95733.5	77848.8	133028	82221.8	70993.2
BML-LCMS18-29.63-623.3647		180840	255548	343051	302610	317817	18407.2	28267.6	32752.1	20999	24851.8	526574	589900	529904	802003	725438	134431	233756	313121	153553	186323	60538.2	43989.9	66794.4	44219	42194.2
BML-LCMS18-7.71-304.1783		180702	192767	209345	192982	187592	254541	387740	465246	394510	420222	659184	600983	430113	144647	148956	28873.6	43295.2	34163.9	27394.2	59033.1	114955	120096	122144	105331	95089.5
BML-LCMS18-17.19-618.2699		179868	159901	156184	143468	171341	132384	142639	153665	162034	62525.5	207578	47748.8	28164.6	92967.9	62985.5	13664.5	364892	85848.9	26451.2	44920.2	1.603e+06	377205	385943	337291	298080
BML-LCMS18-7.22-841.2546		179594	117304	125825	133946	113813	0	0	0	0	0	0	0	0	0	0	0	0	0	0	0	30446	33173.1	21547	40111.9	34030.8
BML-LCMS18-23.68-595.3326		178459	127057	156557	217121	123885	0	0	0	0	0	0	0	0	0	0	114826	189528	112438	194329	179551	775697	736510	672206	772555	740342
BML-LCMS18-25.99-542.2853		177676	148613	152477	163434	153764	0	0	0	0	0	0	0	0	0	0	106583	171923	137213	142313	132465	356071	272851	329670	383337	322194
BML-LCMS18-20.99-594.3037		177505	196700	203076	262839	181479	0	0	0	0	0	0	0	0	0	0	152485	210321	207641	229608	223474	206703	208496	272488	253079	244182
BML-LCMS18-5.84-194.058		177473	174075	109114	90379	142745	44759.7	256523	509518	223311	250918	44299.9	193847	196617	108238	184179	773582	1.76728e+06	1.3743e+06	1.18421e+06	1.88406e+06	1.92957e+06	2.35494e+06	1.68965e+06	2.07053e+06	1.90854e+06
BML-LCMS18-26.06-460.2465		177389	145833	179120	122530	149387	0	0	0	0	0	0	0	0	0	0	56431.5	91885.4	91974.2	65951.8	98987.1	40841.6	35708.3	58645	34971.4	39673.9
BML-LCMS18-16.89-340.134		176433	206291	176608	156718	192437	0	0	0	0	0	16295.5	13568.2	13783.7	1155.2	1769.8	170643	220457	155637	194805	197217	64917.1	59061.9	75567.6	68686.3	58368.2
BML-LCMS18-25.63-526.4871		175512	2.43888e+06	2.38963e+06	177228	139950	15079	45732.9	13395.4	11019.2	31047.4	7813.88	20822.8	8412.06	41063.2	15768.1	1.76837e+06	3.37996e+06	168475	3.23665e+06	3.48977e+06	5.59466e+06	5.07775e+06	5.42716e+06	68928.6	99953.4
BML-LCMS18-30.49-574.3433		175153	171805	175606	157716	190291	0	0	0	0	0	0	0	0	0	0	19385.6	75556.5	71705.9	41132.7	44465.8	91818.1	76191	107800	78404.4	70822.7
BML-LCMS18-28-643.4854		174725	169982	172231	177642	158349	184500	187418	186971	207770	192866	233579	204003	175013	187857	197493	279886	133134	174178	148751	170366	177028	152261	185938	144157	148891
BML-LCMS18-27.44-465.308		174592	155999	159408	138956	150670	0	0	0	0	0	0	0	0	0	0	43497.8	60115.5	41353.1	60486.9	53530.2	95382.1	79784.4	104281	85289.9	88816
BML-LCMS18-28.38-508.2422		173427	169092	184345	157191	161864	0	0	0	0	0	0	0	0	0	0	14064.5	78776.6	75241.4	48664.6	43419.8	78189.7	86399.3	121641	93145.1	98319.3
BML-LCMS18-31.89-460.3186		173332	176389	180059	158308	177100	0	0	0	0	0	0	0	0	0	0	50186.6	54065.3	39981.7	59703.3	47713.4	139789	131661	180375	143274	128963
BML-LCMS18-32.82-366.2764		173059	81459.4	57679.6	53743.2	37220.7	171760	348198	459981	591509	270193	0	0	0	0	0	0	0	0	0	0	539238	496588	477694	410739	426039
BML-LCMS18-10.42-372.1216		172980	146323	154349	147790	130920	558552	500497	687358	903248	551985	449005	770856	750748	467037	418662	116610	164642	196103	161167	230354	234743	264803	252056	284470	280364
BML-LCMS18-30.24-380.2878		172941	237158	240902	236591	304541	32645.6	29733.4	23526.1	9249.83	18260.9	89688.2	53087.4	59621.6	72885.6	49561.7	9266.13	26997.7	22828.8	10728.8	16182.6	23585.6	11889.9	25212.3	14639	12450.6
BML-LCMS18-28.93-548.3262		172667	166772	164821	154932	189325	19786	55129.6	28429.8	17221.1	39092	12163.2	81980.4	26888.3	45690.8	20833.4	554426	1.07393e+06	1.14266e+06	854410	947841	1.58945e+06	1.40022e+06	1.88749e+06	1.40503e+06	1.4124e+06
BML-LCMS18-26.59-534.3153		171532	155067	167777	151879	162809	0	0	0	0	0	0	0	0	0	0	118175	152268	117237	131179	131275	113643	97468.8	129120	106478	104423
Amentoflavone-hexoside II	biflavonoid glycoside	171406	101432	53253.4	87683.9	68104.7	6407.94	5209.67	6028.33	5391.24	6024.07	80090.3	253517	214756	102121	58510.4	1.01033e+06	1.05712e+06	733689	1.03364e+06	1.29799e+06	396678	351132	316103	372728	404300
BML-LCMS18-31.14-500.277		171054	156402	192364	135846	176790	0	0	0	0	0	0	0	0	0	0	25874	62470.6	66089	32183.7	38383.6	57456.6	40671.8	59364.2	71780.2	58267.8
BML-LCMS18-12.68-553.2160		170492	163242	158891	156105	143532	451488	355988	522456	631400	356733	181385	188363	160542	81438.1	68622	19461.5	42433	37993.1	25712	52528.9	221705	239385	208846	191898	205268
BML-LCMS18-37.96-862.556		169967	227214	252684	471763	484294	0	0	0	0	0	0	0	0	0	0	8528.56	16279.2	11707.2	15352.5	22553.3	43016.3	41264.9	81763	56589.1	53779.6
BML-LCMS18-30.25-514.2887		169515	178815	231367	161629	194951	0	0	0	0	0	0	0	0	0	0	24834.6	76397.3	58250	45288.2	53765.4	69544.7	53773.1	72123.2	57626.6	59982.3
BML-LCMS18-11.18-861.3247		169030	146148	163624	151014	146824	0	0	0	0	0	0	0	0	0	0	20445.5	29976.5	27481	24319.9	28011.5	73864.1	72311.7	92226.1	85315.6	68640.6
BML-LCMS18-16.6-715.2823		168640	163812	173797	154455	165562	0	0	0	0	0	14850.1	17725	17321.1	11920.9	8669.19	46886	115674	111644	63658.1	82278	155143	157676	148768	130513	129843
BML-LCMS18-15.84-716.4781		167935	65716.7	10213	5845.16	5279.31	353.977	343.028	523.479	142425	23312.8	176481	56773.7	10049.1	5814.78	3665.73	228612	25172	237212	54002.2	26672.2	59531.7	18052.2	9953.48	0	0
BML-LCMS18-19.89-244.0725		167516	93188.7	80109.8	86540.1	88774.8	54026.1	73219.7	66317.4	180164	61479.6	182029	92816.7	71238.5	57558.5	57651.7	158885	44204.7	104114	44174	45014.7	61970.6	50974.7	73244.7	51335.9	40120.7
BML-LCMS18-29.67-1060.598		165069	122876	127616	167606	130443	0	0	0	0	0	0	0	0	0	0	84697.1	77400.2	47227.6	102924	78801.4	132549	140934	198048	168460	167413
BML-LCMS18-7.90-386.1937		164627	130314	131619	132907	136055	19488	31689.7	23450.9	26066.9	34320.1	420109	857319	1.2655e+06	1.78693e+06	1.88098e+06	85366.2	64211.9	58809.1	69674.1	130221	240731	290956	263532	236703	240649
BML-LCMS18-29.41-262.2284		163839	171254	184622	173384	183813	46403.7	27127.4	10128.4	9365.7	14622.6	127709	81993.3	73926.1	92962.8	80754.5	65106.8	96862.3	74931	68630.3	69405.1	75044.9	71473.6	100280	78591.1	74404.9
BML-LCMS18-2.45-659.1982		163211	166013	212418	203304	169241	168007	259976	228272	217387	237904	875990	840003	996198	155258	82919.2	12533.8	16012.5	17083.6	7005.12	16183	18639.5	18640.5	20405.1	19702.9	16201
BML-LCMS18-32.14-462.3174		162320	150914	151627	150513	153360	45033.2	70972.6	39122.3	33731.2	52136	0	0	0	0	0	27789.1	72159.4	53367.3	50674.7	43496.3	114233	118091	146670	131366	130571
BML-LCMS18-5.18-567.0819		162249	172876	172727	155569	142851	264977	301912	298200	338763	293126	356960	428639	334099	358221	380172	63804.2	121607	186276	149062	181915	161354	180063	314631	256042	269602
BML-LCMS18-7.05-368.1461		161453	132365	132370	80388.3	79607.1	223865	355203	251936	296848	330608	394549	429315	606633	298901	232002	138627	152104	165154	119555	227752	388471	402300	498390	328239	294428
BML-LCMS18-11.98-544.1916		161385	157545	180299	169222	145051	72469.9	65534.4	74343.5	108721	59904.1	63311.2	73230.8	56993.7	44517.7	38094.1	67346.8	158552	131826	90537	130858	137379	141056	160038	125986	121598
BML-LCMS18-27.42-488.2721		161232	149873	162959	158869	153202	0	0	0	0	0	0	0	0	0	0	92716.1	113737	94198.9	76481.9	112781	123376	110685	130003	114775	116892
BML-LCMS18-29.57-274.1925		160298	172843	188499	148662	182324	387733	403952	533072	407779	512102	178281	385194	249399	157827	71540.7	64873.6	100131	107530	65560.7	88829.2	184202	165276	178493	141513	176800
BML-LCMS18-37.19-795.5832		160242	207065	252247	251473	375693	28011.7	43998.1	29661.2	36145.6	44218.5	28989.4	91379.5	167077	298115	340808	64702.2	141463	124101	152316	202395	84538.6	65642.8	91849.8	73468.8	76217.1
BML-LCMS18-2.51-168.0439		159957	140620	155530	147519	131963	176882	181093	265881	284291	183688	107423	218605	176351	85602.1	81325.3	49823.6	126002	133327	85393.6	134636	268149	311433	293795	268324	271867
BML-LCMS18-12.62-328.1346		159906	129185	127104	133676	131553	41391.4	33150.4	60838.2	55037.9	34330.1	259555	413698	284279	116613	76565.4	18969.1	70542.7	67914.3	35311	84842.3	218266	227345	238370	246637	230854
BML-LCMS18-29.8-330.276		158886	157562	186137	172296	179136	82362.5	66056.1	71282.5	88018	66987.6	131190	110395	98786	83265.6	78812.6	124996	86171.9	89110.2	93090.6	99942	150927	131128	167518	136882	138910
BML-LCMS18-25.97-704.3382		158878	134227	128154	86024.7	138794	0	0	0	0	0	0	0	0	0	0	0	0	0	0	0	92540.2	126891	181618	140625	143395
BML-LCMS18-29.92-601.2473		158687	147767	145092	148334	138366	0	0	0	0	0	0	0	0	0	0	35541.9	76249.4	83462.4	73116.8	69216.5	121509	139935	209544	159231	161129
BML-LCMS18-18.15-270.0542		158476	122318	120547	117790	131956	0	0	0	0	0	3521.3	28955	39800.1	12572.5	11249.9	540656	262486	152176	429039	445966	140941	125089	166068	133738	130888
BML-LCMS18-28.56-323.2803		158127	205658	139706	254299	237205	7642.11	10912.1	4916.76	4724.09	4032.13	1096.01	687.284	3609.27	6403.15	4247.64	21400.4	36434.7	49122.5	27750.3	32756.6	124834	88697.1	198284	103853	86252.6
BML-LCMS18-25.75-582.3202		157316	111507	123146	174137	89247.5	3408.34	7836.4	3138.08	4100.36	5080.39	0	0	0	0	0	374559	236483	139519	377023	303756	493118	448557	446362	534409	512995
BML-LCMS18-37.02-396.4073		156483	257880	337051	457314	526783	111785	120457	115362	80784	157049	45093.9	202687	127588	108483	131064	123084	255646	248200	308733	433929	199646	177815	223041	142707	171102
BML-LCMS18-14.19-628.1782		155044	118924	98987.1	120580	102435	11415	16088.1	18735.4	35786.6	25618.3	365814	377781	202703	52514.2	39635.6	14982	51748.8	40544.6	30306.3	51759.7	236928	218991	229328	191773	199204
BML-LCMS18-31.14-624.5451		153640	143537	137016	131955	140347	0	0	0	0	0	0	0	0	0	0	72108.1	157606	121073	117746	117953	98735.3	82715.4	114211	102148	97829
BML-LCMS18-15.67-458.2156		153290	120550	121697	149295	117500	29464	41517.6	38296.8	61419.1	32741	437151	1.1992e+06	1.70025e+06	2.54635e+06	2.51536e+06	105239	156757	138038	130361	248856	532117	597427	543307	516653	487238
BML-LCMS18-12.67-900.2801		151557	150452	156787	145155	146259	8849.02	12628.3	11121.7	10077.4	11099.1	52914.8	83703.1	78576.7	58011.2	41264	115984	224981	275546	184291	274773	282992	297525	285908	278806	278291
BML-LCMS18-16.47-864.2038		150955	122815	124827	137737	122637	0	0	0	7526.4	0	80597.9	174551	88984.2	82353.2	59546.4	785027	833595	779410	830132	1.11901e+06	138268	220552	60296.1	35669.1	247643
BML-LCMS18-13.25-372.1212		150833	111067	125886	119094	120332	212963	173764	254855	233620	180410	111904	196545	155484	100044	93683.5	88916	169039	193487	136028	193362	173826	183337	185360	183792	180709
BML-LCMS18-29.92-602.2637		150245	137417	133841	137204	125731	0	0	0	0	0	0	0	0	0	0	28204.6	75688	76616.3	71405.3	61955.2	110656	129296	189178	147186	148393
BML-LCMS18-32.8-592.2692		149898	217193	319763	316573	286922	26535.3	24181.3	26201.1	10157.2	18180.2	2.88136e+06	3.52806e+06	3.0824e+06	1.81284e+06	1.07164e+06	9657.33	16452.7	6951.28	3013.79	4687.75	96131.3	105650	120132	102008	103343
BML-LCMS18-27.01-662.3064		149801	139010	139490	125681	134851	0	0	0	0	0	0	0	0	0	0	36411.7	61719.8	63465.8	46356.4	48399.9	82589.6	73146	99036.9	77922.5	80950.5
BML-LCMS18-14.18-623.2207		149652	111581	98448.2	117709	92365.2	8086.4	6435.65	11410.8	10634.3	5957.59	468941	479989	270712	66363.4	39400.2	15374.6	45567.9	41662.1	21830.6	48220.9	264032	255682	270510	242225	230722
BML-LCMS18-17.85-358.1951		149510	141107	195353	273003	150169	0	0	0	0	0	0	0	0	0	0	81262.4	175450	70347.5	197381	195105	521919	563557	572632	660656	643185
BML-LCMS18-30.12-1036.578		148742	141138	125393	114575	122115	0	0	0	0	0	0	0	0	0	0	39126.2	78902.2	53036.7	63834.6	47867.2	73185.6	65593.3	96446.8	84378.7	77616.3
BML-LCMS18-16.53-734.4872		148560	45746.3	6402.12	4866.88	3012.6	1651.53	1491.64	840.381	162122	16595	166793	34872.1	5864.67	3639.28	3930.69	252428	18532.5	219696	43653.9	20169.5	44009.1	14109.7	6773.8	3938.1	3457.49
BML-LCMS18-36.41-842.5185		148299	180062	189518	311286	324187	108562	159376	146554	134454	139545	344057	469710	676130	793073	638214	0	292805	495563	114522	303841	453868	322741	445939	330912	374404
BML-LCMS18-28.93-348.2654		148244	146374	155973	131434	140656	71580.4	129896	86311.3	57315.2	90372.8	11838.1	48996	122429	152680	137039	1404.44	8147.25	7201.07	2557.38	3011.52	107566	115097	129364	116454	123673
BML-LCMS18-29.46-539.3447		145651	147434	141240	148767	144069	0	0	0	0	0	0	0	0	0	0	46182.6	75000.9	71396.7	65020.4	66858.6	160462	130779	175782	120950	130438
BML-LCMS18-30.36-706.3081		145446	137108	128878	127177	130904	5823.1	9835.78	11694	9463.82	12927.5	11019.3	23686	15122.4	10231.4	4078.45	44185.2	53782.6	50840.7	52459.4	52553.6	90645.4	87270.3	94919.9	86108.3	90504.9
BML-LCMS18-2.16-208.0733		145157	73889.9	73908.5	54875.8	94218.5	0	0	0	0	0	0	0	0	0	0	102400	272228	236235	140287	523409	282913	430356	367873	442406	385299
BML-LCMS18-36.47-776.5409		144748	180669	217511	205971	272290	38440.4	75360	45184.2	45602.9	66164.9	152849	367415	593686	920751	962426	133957	242153	212767	296790	425860	201259	164860	167605	163164	169859
BML-LCMS18-11.48-699.2726		144620	124523	131219	137144	118427	13486	20807	15941.1	14252.7	20750.9	17534.4	40934.6	49023.3	44328.8	39513.2	42395.1	76725.8	72320.5	56239.1	74176.1	104988	102873	113813	106093	95943.5
BML-LCMS18-23.85-542.2837		144521	150874	194942	168450	97112.2	0	0	0	0	0	0	0	0	0	0	535918	311526	183764	546343	436878	415776	490141	487548	607191	638845
BML-LCMS18-29.4-260.2127		144300	169121	147736	156350	150556	0	0	0	0	0	0	0	0	0	0	58464.6	83756.5	64119.8	65065.5	65978.8	70335.5	60205.2	76070	63235.9	59138
BML-LCMS18-22.11-610.3336		143919	130504	175846	163345	135666	0	0	0	0	0	0	0	0	0	0	41477.7	81129.6	48604.4	41593.4	46651	155754	158730	146148	167618	156105
BML-LCMS18-28.93-591.3749		143806	138261	138662	130277	134201	0	0	0	0	0	0	0	0	0	0	38256.7	62096.1	67715.8	51739.7	64011.9	107378	107631	134508	104508	100323
BML-LCMS18-3.82-326.1031		143148	44201	9812.85	41827	13556.2	197644	549466	211931	483481	584018	82975	383061	380442	1.88139e+06	1.24437e+06	360392	1.22124e+06	1.04962e+06	600491	1.91019e+06	3.1066e+06	4.61565e+06	2.25816e+06	3.876e+06	3.18656e+06
BML-LCMS18-35.1-962.5908		143022	177663	206107	205016	278451	23413.9	28690.4	26594.5	25744.7	29548	15767.2	98903.5	164950	269096	353849	40355.1	55929.4	57192.8	65055.4	92385.1	196996	154146	183096	149457	152016
BML-LCMS18-12.69-358.1431		142917	125110	136631	128640	105126	62423.6	46270.4	78346.9	77262.8	49292.8	214665	312543	201979	72195.4	50761.6	46560.9	118772	112052	72073.4	109281	257078	258453	274286	260217	251324
BML-LCMS18-21.02-618.2983		142660	128066	147867	198616	122190	0	0	0	0	0	0	0	0	0	0	153965	200763	156556	224006	226236	501289	532374	518082	603418	626718
BML-LCMS18-39.03-537.1569		142261	59635.1	20266	44935.9	21035.5	24602.3	58095.5	0	204092	31234.7	15321.3	34796.6	27104.1	19085.1	15801.5	204777	30540.1	199817	49131.4	36278.9	43598.7	20261.1	25919.2	18291.7	21374.7
BML-LCMS18-15.78-452.3341		142194	45501.7	6785.89	4016.85	2972.91	1121.56	1348.56	711.658	147419	17374.8	164645	40885	6194.2	6448.18	4932.72	157229	13661.2	145704	27412.1	13471	29834	9566.03	8790.79	4337	3364.83
BML-LCMS18-35.58-916.6095		141727	198173	281848	336254	500633	68395.2	89482	81170.6	78430.1	71800.4	85582.4	506478	668937	929594	833882	250242	317557	267110	383304	623900	547584	397437	509354	410739	467210
BML-LCMS18-18.70-618.268		141247	92751.2	108537	86375.6	82023.4	148887	327239	221194	351333	152797	111784	89381.9	60316	123360	181701	61257.1	386781	388255	135274	182563	594352	579889	556095	430501	346279
BML-LCMS18-8.33-308.1266		139823	155775	129848	129370	182695	60508.3	102386	72338.1	100854	64668.3	292569	154672	119758	95063.2	70780.6	51028.7	22002.8	75167.6	56523.9	53254.1	0	0	0	0	0
BML-LCMS18-12.20-504.2026		139604	123402	121130	112918	117460	54686	30835.8	83112.5	76890	35979.5	325391	224114	44030.3	21187.7	0	35614.7	43828.4	24039.6	9300.6	22759.3	93161.6	86698.1	78832	90138.1	86708.5
BML-LCMS18-28.81-324.3491		139337	75309.1	43992.2	26616.4	18801.9	42737	33757.8	39771.7	22533.5	16475.3	18018.6	26360.4	23564.6	11222.3	10764.5	125448	71324.5	66626.8	44661.9	55154.6	174093	88132.7	63260.5	39487.8	39883.1
BML-LCMS18-3.45-372.1455		138847	163433	324875	166155	181365	253408	580266	469043	473475	594439	1.39975e+06	1.6392e+06	850876	833360	3.10369e+06	117179	255689	188997	143311	605310	573672	581823	704381	496571	552961
BML-LCMS18-27.56-423.3554		138344	127424	136847	139225	129402	156883	167801	168886	181762	163735	191633	173144	157361	171810	171215	238574	121532	147952	123275	154337	124525	100334	139441	112848	126505
BML-LCMS18-34.63-463.4205		138085	57347	13403.9	11396.3	9102.75	2055.22	2006.59	1888.87	271507	39082.6	119885	66136.1	13457.8	12551.9	8282.78	205684	30211	247559	72379.7	40622	54545.8	19112	12911.2	0	0
BML-LCMS18-5.06-693.2441		137984	112667	100252	84418.1	101291	0	18489.3	0	0	36010	22263	13490.3	80973.8	36566.5	55003.5	0	23118.9	15826	16846.4	17013.6	145057	166690	153343	141694	148730
BML-LCMS18-37.93-928.5658		136038	141577	116653	119519	139653	0	0	0	0	0	0	0	0	0	0	0	0	0	0	0	15596.8	11642.5	20039.4	14772.4	13897.7
BML-LCMS18-25.97-595.3334		135781	111291	109758	157305	140303	0	0	0	0	0	0	0	0	0	0	103944	377221	234074	239244	226509	759966	696297	763358	743974	768453
BML-LCMS18-3.44-372.1444		135610	134190	254756	141585	115134	242584	377673	519420	461774	367829	1.17448e+06	1.16133e+06	467684	606517	2.92154e+06	31154.8	67580	97625	53121.7	374900	529001	574113	458478	462876	523344
BML-LCMS18-12.72-628.1992		134870	126749	127635	138767	127362	24138.3	18473.9	25740.5	27514.6	19605.5	36425.6	43297.6	29170.8	20361	17851.5	63655.6	20175.5	20763.6	28516.2	51539.4	189774	184301	183041	169416	173625
BML-LCMS18-12.02-553.2158		134729	117369	136780	116547	108709	1.01817e+06	739097	1.17334e+06	1.58658e+06	768896	120519	123993	104282	102546	77796.4	10759.4	32134.2	31243.7	14602.1	35202.3	184279	178767	132661	155371	160750
BML-LCMS18-32.59-866.9411		134341	130135	122049	132030	157017	0	0	0	0	0	0	0	0	0	0	22457.2	33096.4	34676.5	32578	36080.4	44060.9	41546.3	60510	41786.1	35267.4
BML-LCMS18-13.16-286.1384		134148	92621.2	156334	177157	101928	0	0	0	0	0	0	0	0	0	0	646233	287528	179588	548007	456336	436480	454132	437316	482315	515150
BML-LCMS18-33.34-636.2997		133843	157776	160774	172080	212707	150820	166080	163442	165608	159098	217679	190026	207763	216108	199521	240993	162978	208600	172396	194818	173812	159436	176739	125027	186551
BML-LCMS18-31.38-304.2387		132645	146084	169688	141123	179568	1.17234e+06	2.07736e+06	1.98724e+06	1.21395e+06	2.23096e+06	331555	470808	240935	177001	82208.4	12495.7	12971.2	8559.55	2938.08	14800.3	105332	102867	102915	93339.8	108240
BML-LCMS18-33.85-500.3101		132238	119961	110427	110701	195964	0	0	0	0	0	0	0	0	0	0	16629.3	27253.3	41001.1	29642	22065.6	62627.5	48542.5	71310.5	55448.9	57132.3
BML-LCMS18-20.71-704.1679		132231	73415.4	72757.2	78450.8	61413	36315.2	32622.5	38258.2	27664.4	25959	71395.7	147322	145532	164429	182600	278329	447942	495603	371531	499570	274902	273198	272687	255725	263507
BML-LCMS18-15.07-623.2209		132101	116620	111882	104124	79794.8	5759.9	3816.57	5763.58	10138	3393.44	95594	113735	70771.8	12849.5	3961.24	66303.2	215355	178257	109962	150721	280048	246879	236210	246553	229356
BML-LCMS18-25.28-364.2047		131910	119533	114112	91962.4	125234	66546.7	57056.5	35923.9	37970.9	41879.8	132598	249520	385041	528941	417418	110833	170569	135640	142994	226313	154536	163082	163394	157076	132868
BML-LCMS18-35.75-1036.552		131854	129978	133753	168232	198016	0	0	0	0	0	0	0	0	0	0	100602	291559	185589	241308	317265	121425	104057	131153	117115	119083
BML-LCMS18-10.40-569.2104		131832	107863	111252	109744	95918	355094	299652	423177	536030	324051	401900	638702	610951	352259	314509	79883.5	112273	37084.4	97614.7	166694	212224	233516	182292	222774	224033
BML-LCMS18-29.46-328.2604		131387	118605	128702	129076	128049	0	0	0	0	0	0	0	0	0	0	56175	83273.5	79246.2	74992.9	75964.9	118548	111704	139161	114132	117476
BML-LCMS18-3.31-524.1501		130961	159130	102936	92332.4	108936	32331.7	70348.5	56213.4	64767	98625.4	109957	166116	192393	246779	211334	20208.4	25669.1	28658.6	33052.8	0	102798	196272	100773	102673	107760
BML-LCMS18-28.4-463.4798		130583	123117	141538	103896	123048	0	0	0	0	0	0	0	0	0	0	7242.84	28404.1	24341.4	20065.3	16565.9	38669.4	34256.6	39663.2	36140.1	30336.9
BML-LCMS18-9.70-387.2445		130580	42951.4	12816.7	9840.33	9906.18	2622.32	5182.46	9860.68	159063	23828.1	161272	39265	9726.12	8971.1	6663.49	152883	17445.8	148625	33973.2	22233.5	31289.3	16378.1	13769.1	7176.74	7223.22
BML-LCMS18-25.5-573.3135		130022	96716.3	126048	152355	82594.3	0	0	0	0	0	59675.8	73272.7	53311.8	78149	105281	278485	281913	122799	267149	214445	331959	247152	219497	260385	287312
BML-LCMS18-5.23-612.1596		129814	117677	112710	137341	106289	0	0	0	0	0	52462	136995	109502	8833.83	8896.06	0	0	0	0	0	329806	372381	295796	262157	295039
BML-LCMS18-22.67-180.1125		129802	139870	151412	146345	179089	36132.9	32461.8	50409.5	28700.7	13776.5	700702	375537	180322	201435	151549	1321.93	8574.41	9712.25	5500.52	11867.1	20805.3	27282.8	35252.7	30483.8	30853
Dihydroamentoflavone-hexoside III	biflavonoid glycoside	129400	122767	128540	143668	131828	23454.6	27898.9	22348.4	28012.5	17869.1	65626	184038	204575	234298	249374	818017	884709	959862	857891	1.13006e+06	302958	258393	278509	247823	261416
BML-LCMS18-27.43-470.4507		129342	120897	126251	109424	123097	0	0	0	0	0	0	0	0	0	0	18038.1	36780.4	34266.3	33193.9	31948.8	77229.5	64856.2	82420.8	72243.5	77545.8
BML-LCMS18-32.6-652.3595		128976	122951	135636	113732	135321	0	0	0	0	0	0	0	0	0	0	62525.3	115906	103847	80272.5	99512.8	51076.8	48229.2	65324.4	50367.2	48720.5
BML-LCMS18-22.7-218.0948		128331	132051	129673	122736	123538	0	0	0	0	0	0	0	0	0	0	38424.8	59582	43403.2	45005.8	38913.2	47684.4	41283.5	68132.2	46297.3	46877.6
BML-LCMS18-25.99-596.2741		128278	109078	98403.6	121807	105622	8040.58	13456.5	18932.6	12740.2	10168	18967.9	33726.5	24587.1	13248.5	11156.1	126949	196322	187477	113335	126832	176655	164732	199786	144977	148910
BML-LCMS18-25.75-453.2833		128106	108284	128470	104001	113553	0	0	0	0	0	0	0	0	0	0	309947	129973	50412.7	274662	219625	129737	107757	137413	128127	127843
BML-LCMS18-35.22-874.5222		127969	129882	192770	127295	149773	0	0	0	0	0	0	0	0	0	0	34340	62665.3	44416.1	50991.4	41201.9	44219.1	38851	56356.4	43850.2	49132.3
BML-LCMS18-35.21-368.375		127967	151040	189739	136030	107310	102248	83672.1	117571	73382.9	48315.1	21642.5	105903	115475	58429.1	56462.9	137196	177800	174764	119722	159487	205138	158193	151512	96872.1	105122
Dihydroamentoflavone-hexoside II	biflavonoid glycoside	127828	116061	162896	117559	115146	0	0	0	0	0	66073.6	144041	113782	52179.7	40523.6	985739	912508	821233	866789	1.21128e+06	236855	206712	205936	203611	217853
BML-LCMS18-28.64-538.2902		126499	120679	143422	135209	139827	0	0	0	0	0	0	0	0	0	0	187196	333997	313668	272727	297461	142542	104540	127739	94789.7	106868
BML-LCMS18-13.84-372.2148		126426	106239	110965	131735	114002	32349	53730	43143.6	46314.7	49642.8	232335	644421	852256	1.49785e+06	1.56335e+06	155319	259282	287677	279807	453124	275104	308603	302860	282928	285335
BML-LCMS18-26.63-296.2336		125671	124954	136533	110506	113331	38350.6	106880	47524.7	27455	65366.9	13778.2	15592.1	42292.7	75207.5	130731	22100.3	35037.5	35251.4	25567	37707.8	38490.1	29428.8	49783	38148.7	46414.8
BML-LCMS18-31.15-641.3553		125489	122822	126513	121750	124995	0	0	0	0	0	0	0	0	0	0	50368.2	77016.1	75828.7	63707.7	63091.5	79770.8	67874.8	88324.5	69672.4	69832.9
BML-LCMS18-35.7-418.3048		125251	129485	130601	159644	163413	0	0	0	0	0	26819.7	101947	105763	101207	92900.7	227644	158016	157235	216405	286207	187793	157902	206480	156374	180110
BML-LCMS18-26.5-450.4838		125128	107950	110914	101787	103854	0	0	0	0	0	0	0	0	0	0	32683.9	43181.5	28397.6	44735.8	43389.8	107602	87829.6	117094	102604	100938
BML-LCMS18-26.62-502.2528		124881	115198	114160	120266	112802	0	0	0	0	0	0	0	0	0	0	89505.2	70846.6	73925.6	103579	94286.9	84120.8	72300.4	84561.8	73546.2	71130.9
BML-LCMS18-22.7-212.1405		124367	147713	152724	142266	187773	40099.4	39412.3	48242.3	28879.6	22537.2	731983	392837	180444	184900	139017	0	0	0	0	0	25413.1	27863.1	32331.5	30143.1	27299.9
BML-LCMS18-29.54-631.3671		123776	176176	212422	165083	188984	49882.5	93751.1	93776.6	53971.6	78940.6	4.467e+06	3.40971e+06	3.08525e+06	6.32705e+06	7.9123e+06	9874.04	19383.1	25032	10686.5	8393.24	57694	46117.2	57542.1	43983.4	47584.7
BML-LCMS18-8.35-586.1505		122623	226753	223815	172192	286366	23232.5	77177.8	51235.7	17215.3	27530.8	743229	747258	635902	51974.9	17667.2	5156.77	4982.73	8749.04	33656.2	29151.3	0	0	0	0	0
BML-LCMS18-31.38-282.2552		122413	130843	148958	118892	156237	1.0147e+06	1.79827e+06	1.71476e+06	1.05784e+06	1.95903e+06	309467	433333	212688	157432	72429.2	18631.8	15085.7	15148.7	13934.6	15738.6	84591.1	91207.6	90194.1	77184.6	100200
BML-LCMS18-9.28-344.1828		121905	120373	122782	110497	116414	186851	265236	208340	259029	244267	195407	279407	290308	466464	447435	112285	197486	227038	167712	273195	167040	170357	176034	154644	147868
BML-LCMS18-36.89-974.5735		121565	122821	133827	131377	159933	0	0	0	0	0	0	0	0	0	0	20320.4	39078.5	37324.2	28651.6	37791.8	65216.4	60608.3	89871.6	75372.3	69254.3
Apigenin-7-O-glucoside	flavonoid glycoside	121465	94001.1	79606	92472.1	100527	0	0	0	0	0	8875.89	28824.4	39412.3	17647.4	15705.6	220132	104332	97924.1	163736	212026	145391	153507	199366	178272	187709
BML-LCMS18-29.72-509.3337		121290	120498	149575	90774.8	151811	0	0	0	0	0	0	0	0	0	0	7122.55	18700.3	18329.7	13256.3	13531.2	57595.7	48649.2	65310.7	54633.6	57308.9
BML-LCMS18-36.65-367.3822		120221	144278	156099	145680	134669	91983.8	85570.2	118477	90841.8	80010.8	22477.2	130053	100117	68129.4	74906.5	145119	195826	205237	163996	213675	195954	161512	150779	115601	130371
BML-LCMS18-11.05-431.2684		119744	43417.3	17107.7	14396.9	15167.5	0	0	14906.9	151467	27862.1	156206	40756.6	14272.9	0	0	142653	20858.7	130015	32773.1	22683.5	34015.8	16932.5	17920.3	9987.37	0
BML-LCMS18-14.56-738.2488		119614	115487	122797	123673	115741	4020.69	6911.35	4686.99	7806.2	5485.03	0	0	0	0	0	20070.6	57092.1	38294.6	27878.9	37775.9	91530.1	89825.7	113644	91055.3	87982.2
BML-LCMS18-23.8-596.0388		119526	117616	118905	112748	114930	28390.8	18733.1	30787.7	22657	18823.2	26385.8	39702	32498.1	25185.8	27499.6	85029.8	142084	173577	136420	161369	111779	123356	180370	129719	137288
BML-LCMS18-25.36-600.2896		119520	117621	115241	129955	120504	123793	137769	134864	143927	126348	172818	129886	125303	123518	146006	142329	80068.5	96523.2	82476.5	97843.9	95795.6	78183.3	85881.7	70483	84058.8
BML-LCMS18-30.65-264.2437		118744	138677	173094	101559	137897	23926.1	19456.5	9127.03	7724.86	8163.37	53461.6	66251	65184.8	78759.2	71036.5	89334.9	85620.5	64501.3	94514.7	83165.1	81336.6	105234	164199	132862	79827.6
BML-LCMS18-35.63-835.5438		118591	128249	153702	193006	188269	19296.4	25404.9	29252.1	32462	28956.3	134892	147857	279901	397730	303099	14827.3	43163.7	74337.2	30031.7	50710.9	133248	108610	136008	97185.2	103240
BML-LCMS18-29.09-591.3736		118094	110280	114173	112566	93029.3	0	0	0	0	0	0	0	0	0	0	63488.8	70087.5	64629.6	64399	65557	121251	106553	138933	96581.4	100608
BML-LCMS18-26.22-312.2634		117499	103081	103527	80554	96002.2	14958.4	9145.7	12745.7	11121.7	10415.4	46236.8	141663	34871.7	42453.4	89171.4	2187.92	10000.5	9143.84	1575.79	7179.18	10094.7	8088.17	14462.3	6063.32	5912.17
BML-LCMS18-29.46-506.5089		116956	126965	140050	110652	140619	0	0	0	0	0	0	0	0	0	0	14414.9	48906.3	33370.7	33053	40143.9	87092.4	82187.2	88740.2	87958.1	90268.1
BML-LCMS18-24.75-504.2734		116409	92729.3	107656	115358	84197.7	0	0	0	0	0	12865.4	18005	19618.5	20631.7	27785.3	492935	423569	244890	552424	533801	308927	246993	237974	289330	296073
BML-LCMS18-25.04-556.2659		114555	163884	154248	165338	112828	0	0	0	0	0	0	0	0	0	0	74954.3	87448.2	68448.4	139629	141729	111369	108894	120955	116975	117342
BML-LCMS18-21.24-618.2995		114517	71031.5	90465.9	146775	67442.6	6255.59	14070	6618.95	10768.8	9521.5	0	0	0	0	0	268860	146343	162933	272689	255788	630668	638755	560631	687641	713501
BML-LCMS18-12.55-722.2403		114101	112407	119903	99497.5	91461.1	36136.7	43804.5	26063.7	30680.6	62403.5	30216.2	73205.5	53916.4	44230.8	58507.4	128860	206103	254685	190428	333857	289654	297040	287958	227842	225017
BML-LCMS18-14.32-860.3082		113240	111486	111001	106269	105204	2186.68	3876.45	3230.44	3383.76	2841.98	10997.2	21466.6	22072	23631.1	20304.9	89608.4	156006	174204	105918	151323	296170	336295	283208	291623	270777
BML-LCMS18-31.81-530.3227		112654	128951	134020	130477	121794	0	0	0	0	0	0	0	0	0	0	12541.3	25108	25949.9	17661.5	18806.5	74597.9	70166.9	102561	86445.1	62218.6
BML-LCMS18-12.62-340.1334		112514	92200.1	89589.8	93884.7	94172.6	148740	125339	199851	254902	123786	146021	238002	155012	64363	43435.2	7325.5	56733.3	49846.7	21694	61977.3	151822	164622	171708	179606	166242
BML-LCMS18-18.32-340.1845		112057	77400.9	95264.5	142969	65256.7	0	0	0	0	0	0	0	0	0	0	264178	127337	77137	246908	195095	318739	316827	306965	377451	364390
BML-LCMS18-26.71-470.2662		111853	91518.7	81194.2	104087	82726.6	0	0	0	0	0	0	0	0	0	0	154228	242304	171196	224563	200911	200891	144672	167791	153707	148175
BML-LCMS18-28.09-662.3069		111545	109149	109760	97008	108564	0	0	0	0	0	0	0	0	0	0	85271.1	142388	142444	102451	102037	55729.6	45460.5	57049.7	46890	50507.5
BML-LCMS18-10.38-442.111		111102	59934.5	25346.5	34161.5	16222.7	31366.9	59872.3	50327.4	79218.3	60154.9	164067	187082	170470	72211.6	55364.9	147063	604789	390372	254120	454893	1.69847e+06	1.93437e+06	1.76133e+06	1.6496e+06	1.50053e+06
BML-LCMS18-28.57-530.3006		110864	111614	97623.8	125892	100700	0	0	0	0	0	0	0	0	0	0	33003	46693.1	31663.1	42213.3	41783.8	129897	105401	133311	101441	108910
BML-LCMS18-18.32-318.2008		109448	72402.4	92957.2	140902	64829.6	0	0	0	0	0	0	0	0	0	0	250359	134142	83632.8	254862	203921	310484	311170	307182	369619	353386
BML-LCMS18-3.81-164.0474		109419	32423.3	5290.36	32400	6312.38	138865	428194	153434	377168	457667	129630	318341	365400	1.70483e+06	1.06012e+06	268588	926716	821419	461727	1.45467e+06	2.33947e+06	3.36956e+06	1.79599e+06	2.96315e+06	2.50604e+06
BML-LCMS18-22.29-632.3138		109186	79254.2	108301	125530	78027.1	0	0	0	0	0	0	0	0	0	0	0	81380.6	53770.4	65364.3	82109.9	136775	132983	129003	146334	128002
BML-LCMS18-30.43-380.2902		108730	164447	147140	149711	155966	80364.9	55568	54427.5	41981.3	38835.5	287726	156316	139425	168763	105555	141531	183980	134606	162637	155786	29761.9	21933.7	36122.6	35611.1	25991.3
BML-LCMS18-27.83-682.3408		108664	99272.3	97970.8	80165.2	95240.9	0	0	0	0	0	12308	29607.2	25421.4	21707.2	43718.9	121347	115826	84434	116965	125087	47776.4	39412.9	57085.8	41838	42270.9
BML-LCMS18-16.59-506.189		107094	105214	99795.7	93795.3	101937	0	0	0	0	0	0	0	0	0	0	38975.5	86516.3	80186	40997.8	60213	112939	127001	127970	113892	108994
BML-LCMS18-25.6-294.2138		106530	81818.4	92314.6	113459	80691.1	0	0	0	0	0	0	0	0	0	0	50321.7	122841	84672.6	108219	129840	253143	241770	246996	280977	273504
BML-LCMS18-15.42-636.2789		106350	124640	134427	109139	128803	68057.9	121748	102419	120033	51022.5	147757	153450	212970	228066	453447	43438.6	139307	216688	75189.7	117510	578980	546347	558260	408111	478593
BML-LCMS18-26.23-420.2864		106036	94877.1	80279.1	70426.6	78968.3	595336	397787	422800	356216	425377	1.91569e+06	4.38613e+06	5.43479e+06	3.97766e+06	2.8805e+06	343297	278112	303589	378491	572313	114038	116174	130084	137256	128607
BML-LCMS18-25.13-446.2669		105880	110588	142507	95106.6	136327	0	0	0	0	0	0	0	0	0	0	105368	202311	156513	167432	157377	44488.7	30564.7	35534.7	28152.1	30017.6
BML-LCMS18-35.75-770.4566		105581	108273	118100	125584	120685	21159.3	16730.6	16623.4	25398	19585	111606	157306	169841	212777	177881	60546.2	132966	133748	125420	182379	140815	121394	124015	116615	128238
BML-LCMS18-12.76-785.2724		105311	124297	254765	115294	85268.4	2911.47	5545.56	3333.58	2571.64	3158.11	27462	38328.6	27365	9689.07	3990.31	160992	513070	510927	261570	378306	750465	674948	714270	643962	629074
BML-LCMS18-12.46-430.1847		105204	94933.1	101894	96774.5	88632.8	93321.4	146685	109224	122397	120816	232766	311425	325394	403015	412681	62725.2	122015	120420	77519.3	142284	165359	173425	164222	146760	127687
BML-LCMS18-12.80-723.2724		105048	100446	108008	94096.2	78883.1	120520	192662	131874	141770	193388	143764	224443	172866	162626	172105	78840.5	109366	155257	109576	171104	243330	266275	266114	215578	225395
BML-LCMS18-12.64-136.0535		104719	89994.7	86653.6	88013.7	82800	136267	107317	164431	206791	106280	144380	200626	130139	0	0	0	66975.2	51245.4	35200.9	57605.6	148648	151594	156925	152287	147290
BML-LCMS18-27.97-586.3113		104693	94389.1	16200.1	101646	105846	0	0	0	0	0	205539	126591	109113	268121	313568	133760	45985.7	59059.1	150789	99230.1	57317.8	40318.2	58324.6	43084.3	48453.2
BML-LCMS18-12.11-475.2951		103914	35939.6	12835.5	11986.4	12128.6	7615.38	9410.6	12558.9	112508	21230.6	122827	33676.6	10893.7	9250.84	10815.8	117767	16786.5	109032	29042.9	20929.8	27490.3	15336.2	13203.3	7202.29	9181.4
BML-LCMS18-20.99-422.0627		103651	113994	130644	126511	123072	13978.4	11806.5	16716.5	10806.9	10071.2	16309.3	30004.4	27922.7	22347.9	26026.7	95522.2	135688	158739	135943	175970	162088	166541	179120	155552	171832
BML-LCMS18-32.89-576.4537		103642	95290.8	107768	105796	108985	214887	252180	239809	257400	207023	602746	519714	290471	339971	370135	267857	415318	388302	353897	428951	248330	225405	239830	201359	207919
BML-LCMS18-29.57-262.2994		103596	120114	133424	103592	91914.6	69277.6	48701.5	66658.2	41236.4	31476.7	18186.7	60970.8	78928.4	38560.6	28334	91228	106561	106074	86350.3	99846.9	167088	143818	138736	96134.7	105778
BML-LCMS18-8.40-388.2097		102284	95042.9	109267	96133.7	106131	33428.7	75495.6	56361	55111.5	51210.9	276553	481974	778450	927319	1.05848e+06	197920	264960	261569	230731	436816	248009	274519	239529	224344	224196
BML-LCMS18-41.34-685.1939		102201	50797	21052.3	29584.5	18716.3	174209	1.04986e+06	238976	268188	132433	32475	372565	295244	79195.9	29627.4	422099	651546	646994	542122	681256	49205.6	21062.3	24150.9	15981.8	18349.5
BML-LCMS18-12.76-768.2462		101809	100913	215378	95507.4	72121.6	0	0	0	0	0	21350.8	27417	22268	10364.2	6327.45	150876	487888	467063	246961	364453	663364	578429	618392	544444	526291
BML-LCMS18-29.63-568.379		101624	112568	121931	90626	120841	315796	393289	489744	356880	453687	177652	344964	178180	100564	52527.5	68751.1	13019	20553.4	35460.2	31913.9	98719.8	92947.3	101208	82108.5	109168
BML-LCMS18-26.63-200.1771		101602	92565.3	95438	101916	88517.5	99231	113887	102199	133278	103175	131491	115800	99709.8	112107	118497	114438	57026.3	77960.4	59033.1	66627.5	64710	60323.7	78223.9	56862.1	59710.3
BML-LCMS18-18.78-862.1935		100917	81026.8	85624.3	93060.9	88630.6	0	0	0	0	0	37149.3	69508.8	61318.2	43798.2	33806.6	246970	284951	253142	247281	350768	138116	122811	119099	112442	121024
BML-LCMS18-22.13-287.282		100670	104882	126208	111709	266130	126414	582793	163774	144132	133395	101484	106932	110701	118556	122465	95116.6	87500.2	99983.2	92618.4	110975	111144	120992	166556	112572	142598
BML-LCMS18-26.12-595.3322		100220	67041.4	63466	112140	69550.7	0	0	0	0	0	0	0	0	0	0	213655	289071	158408	242783	194031	513297	430103	482735	559751	534531
BML-LCMS18-27.43-136.1234		100154	84703.8	93012.6	74601.7	90197.6	0	0	0	0	0	0	0	0	0	0	10622.9	22284.5	21312.4	26407	16087.4	44343.7	36016.7	56187.9	43590.4	46066.2
BML-LCMS18-4.50-304.1768		100047	112890	122036	100353	98264.9	0	0	0	0	0	577023	393164	237974	78826.5	88753.3	0	0	0	0	0	41266.4	52342.9	46005.6	43667.5	36748.3
BML-LCMS18-34.4-612.3658		99977.3	98317.8	107674	161075	175988	0	0	0	0	0	0	0	0	0	0	69161.8	91604.2	63363.1	103144	124916	180122	146227	192317	174799	189101
BML-LCMS18-2.46-675.1928		99858.7	102759	137263	119680	100926	27310.3	32748.9	28306.8	26739.4	31928.3	54377.3	61334.1	79395	14568.9	7365.71	5581.14	17088.6	13769.8	5716.25	13133.7	5142.1	4147.26	4620.31	4295.29	4124.73
BML-LCMS18-17.65-576.1986		99667.1	117860	114170	100638	102060	11794.1	9789.45	13236.2	34408.6	9779.43	5583.88	7087.33	7644.52	1127.97	275.486	51145.5	60846.7	43484.9	51489.1	53791.6	47956.5	44066.6	50316.7	47223.8	51059.1
BML-LCMS18-38.15-902.5502		99509.9	125667	138624	218608	249990	0	0	0	0	0	0	0	0	0	0	0	0	0	0	0	26481	27189.6	41686.3	34097.7	21511.8
BML-LCMS18-16.89-358.1442		98179.4	160914	126731	112128	145146	0	0	0	0	0	0	0	0	0	0	42677.2	68530.9	36679.2	55407.5	49985.3	28913.6	23503.7	32148.1	26990.5	26714.2
BML-LCMS18-30.04-256.2395		97979	100212	115163	124042	107534	160685	169919	170493	196568	177686	229638	207168	194729	245887	263480	165240	140960	181039	158407	215108	154736	138656	173445	131758	146534
BML-LCMS18-28.64-498.2963		97571.3	95567.6	110460	95682	96102.8	0	0	0	0	0	0	0	0	0	0	113459	208466	189655	181203	181829	46368.1	53618.4	68708.1	55085.5	60424.2
BML-LCMS18-26.36-577.3241		97441.7	67430.5	77539	104100	58958.8	3867.47	8988.96	4432.55	4721.13	7709.63	0	0	0	0	0	590202	293888	165041	573459	439096	305412	298487	285922	334405	354117
BML-LCMS18-36.47-798.5252		97051.5	118118	139487	129184	174588	26624.2	48715	33192.3	32711.5	44221.2	103297	250610	403888	642577	685562	89665.5	163590	134667	197414	279717	128971	103730	107189	104583	108875
BML-LCMS18-34.63-610.3504		96956.4	115683	142025	247157	274070	0	0	0	0	0	0	0	0	0	0	142805	191795	171622	224042	392268	293985	252754	356902	307936	365238
BML-LCMS18-37.02-774.5232		96642.8	119153	159934	178579	247249	63112.1	59007.9	52518.3	62602.3	53753.9	101979	218091	257259	278789	222064	72401.4	256892	313075	230157	285223	141998	110410	157735	116135	128270
BML-LCMS18-36.47-793.5678		96312.5	117918	139155	129196	174544	27895.3	48014.2	33127.2	34665.9	45076.6	102602	250786	403767	642777	685283	86686.3	162298	135382	196770	279336	128332	104073	106583	105204	109207
BML-LCMS18-28.73-422.2647		95648.2	110034	122151	113912	112018	6090.28	7618.75	12896.8	7340.05	7855.82	792635	562350	541815	853807	756306	0	0	0	0	0	87471.7	78075.1	87894.7	79050.6	86631.6
BML-LCMS18-29.6-300.198		95388.2	101973	103827	92001.5	89834.4	55434.2	42250.9	60820.1	46793	50672.6	586396	567725	382972	310377	284861	13827.3	16146	15181.9	6813.5	19004.2	30946.8	31327.8	28863.4	21125.6	29880.3
BML-LCMS18-19.63-506.1976		94607.3	101985	91422.7	86001	91069.3	0	0	0	0	0	0	0	0	0	0	25274.9	45121.8	34362.1	30046.2	30789	39702.3	37777.8	45781.1	37101.4	35805.3
BML-LCMS18-3.82-348.0812		94341	35397.6	6039.93	35637.1	10072.9	141406	349410	142491	313195	377257	110913	228786	227198	1.07944e+06	729377	235448	776630	657654	390866	1.22525e+06	1.97616e+06	2.98863e+06	1.43113e+06	2.49897e+06	2.11631e+06
BML-LCMS18-25.53-330.2751		94071.4	93808.7	116205	104907	109256	11092.9	9292.41	9343.23	10954.3	8969.87	225518	684683	434898	416296	354722	39471.7	26892.2	29624.5	27948.8	40941.6	43256.1	33709.9	46066.3	34966.7	33012.5
BML-LCMS18-18.74-290.1568		93832.1	65862.9	74845.1	45363.5	59916.6	125405	244615	166297	236635	108127	44190.3	33987.8	22705	61786.1	82493.2	71152.3	141212	110602	112996	148237	422859	290573	242851	309299	310824
BML-LCMS18-24.86-370.2709		93801.3	53754.1	53975.3	57949.2	53483.9	11504	5695.69	3275.12	3181.07	180.664	20088.7	122556	142061	74349.5	71621.1	136357	258939	193637	190088	198789	57646	33827.6	42116.7	54759.3	41484.9
BML-LCMS18-9.98-190.0627		93432.9	85046.9	51324.2	57117.2	44609.4	14374.9	106370	18298.4	22769.3	92517.1	267309	644915	1.33251e+06	620235	414002	65462.3	147209	181016	115636	174233	771309	860389	613236	873407	1.05343e+06
BML-LCMS18-27.05-526.2577		92928.8	79862.9	84016.4	92739.7	93016.8	0	0	0	0	0	14825.9	49100.5	39189.2	80677.4	76362.6	215135	413868	263366	278342	257735	196592	128366	145106	136781	145450
BML-LCMS18-40.65-802.5503		92803	66811.8	31423.2	41041.6	39277	46145.2	63174.4	54229.5	136640	53934.1	18069	66183.4	36259.6	37717.1	44284.5	119160	49745.8	125646	68778.8	63642.3	69665.7	37953.9	37572	25959.2	27685.2
BML-LCMS18-33.03-538.2457		91904.6	92527.7	94343.1	93169.3	94573.5	0	0	0	0	0	0	0	0	0	0	19646.7	29532	27352.5	23076.6	23570	49505.4	36293.5	48545.9	34676.1	35311.6
BML-LCMS18-27.43-430.2684		91729.6	83894.1	89548	83917.1	92440.9	0	0	0	0	0	0	0	0	0	0	36029	38918.5	23543.6	34229.9	33463.8	41119	50156.8	60805.9	46071.3	60599.8
BML-LCMS18-24.61-392.2558		91602	91159.1	103246	85052.1	101547	0	0	0	0	0	13134.4	86981.7	38208.8	13890.5	51374.1	36183.1	122276	108228	76285.9	86167.9	77149.8	59430.4	88134.1	65761.4	63385
BML-LCMS18-32.59-238.2287		91565.1	94309.4	88544.5	98108.4	108847	0	0	0	0	0	0	0	0	0	0	24681.8	36127.3	33504.7	38295.3	38902.1	35202.1	33504.1	45326.7	36308.7	35362.8
BML-LCMS18-12.95-551.2003		91449.3	87863.8	86283.1	88902.8	75084	13510.2	10344.4	14790.8	535689	9284.43	145509	183316	208950	161842	176700	40483.4	61276.7	87141.9	64026.6	103702	144770	142422	127686	130740	132512
BML-LCMS18-30.25-572.4001		90691.4	106607	127092	85081.4	123036	3919.24	9667.72	26847.2	11298.5	18372.4	0	0	0	0	0	0	0	0	0	0	32926.7	25352.5	29302.4	22756.6	35282.1
BML-LCMS18-21.71-287.2819		90683.9	88538.9	85553.4	84934.9	185570	112611	385845	127515	122854	108552	87483.5	95593.5	94930.4	104770	109191	78864.1	73379.9	79126	73619.4	95117.6	96090	99202.5	125384	94322	107432
BML-LCMS18-12.55-739.2664		90598.5	88280.1	99366.4	86489.2	79675.8	31863.3	42355.9	31037.3	26260.9	51783.2	45353.2	93608.4	92953.2	75767.2	62845.9	107345	159846	195116	135862	243398	208265	216454	189680	170017	169504
Amentoflavone-tri-hexoside I	biflavonoid glycoside	90384.7	63787.8	59955.9	71853.8	71131.8	0	0	0	0	0	32774.2	80336.5	63368.3	45680.8	33851	120642	119964	128398	109045	142633	135300	139483	149743	144613	154440
BML-LCMS18-30.66-296.2055		90225.5	98276.4	91502.7	87148.1	82133.6	75770.7	81547.3	81712.7	47412.1	81129.8	202918	252703	181112	191704	215705	27760.8	42156.7	39186.7	34493.3	29948.3	44556.4	54128.6	73639.4	49423.4	51668.3
BML-LCMS18-30.37-643.3697		90112.8	79398.6	77414.8	70853.1	81131.8	0	0	0	0	0	0	0	0	0	0	49411.9	58991	57517.4	52816.9	56228.8	60887.2	52591.1	58084.3	55870.9	52608.6
BML-LCMS18-24.59-594.3038		89987.9	78708.7	94127	137364	89143	0	0	0	0	0	0	0	0	0	0	334553	539647	277157	496479	501723	241154	194074	209772	227574	226965
BML-LCMS18-11.83-704.2296		89357.2	76282.3	84390.8	72713.1	73568.5	50592.5	102351	65907.4	76714.6	116672	82190.8	166047	190486	290500	359555	42681.4	37876.1	53895.5	46016.7	74700.2	142782	153297	139612	138385	143521
BML-LCMS18-3.73-180.0435		89266.5	52984.4	25876.9	35661.9	46623.1	51993.3	169565	93982.6	128604	159357	67178.4	263645	290448	675976	532820	306864	959151	679803	482136	1.38135e+06	956295	1.24114e+06	847820	1.17472e+06	1.05908e+06
BML-LCMS18-27.96-236.2125		88121.5	98957.4	109259	79993.7	106750	0	0	0	0	0	0	0	0	0	0	59461.4	122497	101932	92961	93219.1	39538.9	30824.1	35420.9	28721	33553.6
BML-LCMS18-32.13-144.0211		87591.7	68400.6	63216.9	75989.6	64444	0	0	0	0	0	0	0	0	0	0	25654.8	36838.7	30053.2	36661.2	34294	59760.7	46364.6	70547.4	48355.9	51865.8
BML-LCMS18-30.3-294.1951		87481.8	97438.2	100139	80353	74113.5	23528	35405.9	48653.1	31655	47149.2	87800.1	93639.7	72105.1	43692.8	19846.8	10997	27310.2	31875.3	16895.4	19220.2	40767.5	41342.7	61541.4	39964.8	50628.4
BML-LCMS18-14.73-733.2927		87267.4	86376.6	92916.3	83811.4	86579.9	0	0	0	0	0	14434.4	18935.3	15551.6	10102.9	0	26848.5	70492.7	68150.3	38760.6	63617.5	108460	111394	105837	96625.9	84129
BML-LCMS18-29.44-406.2701		87213.2	94293.8	75124	87305.6	78736.3	0	0	0	0	0	337069	285018	286072	509549	605343	85535.6	132902	92449.2	97836.9	102960	68870.3	62380	81556.2	66027	67257.9
BML-LCMS18-3.27-388.1275		87005	88242.8	163961	100161	81756.5	60391.6	128535	140616	156277	157610	318103	785167	461226	259136	461777	25042.6	87230.5	59086.6	44021.9	183870	227975	291113	297457	353689	272006
BML-LCMS18-28.24-250.1902		86919	103543	102077	81236.7	119576	6677.39	20729.2	26587.9	13480.2	25745.6	61826.8	75684.8	36714.7	9843.71	5997.4	4633.72	8894.25	11211.4	3170.83	6883.86	39287.2	33575.5	34641.4	32004.4	42287.2
BML-LCMS18-33.04-802.3926		86718.4	92160.1	106937	119476	122420	0	0	0	0	0	0	0	0	0	0	151224	251451	204202	224830	268191	122566	113422	145740	123887	128812
BML-LCMS18-13.47-392.1824		86659.2	74963.5	69077.8	82519.2	76961.8	0	0	0	0	0	52909.3	149212	208278	325289	262780	13500	19339.3	19401.5	19453.6	35067.5	133645	145974	152571	128956	135671
BML-LCMS18-27.83-302.2441		86338.7	82516	79307	83046.5	76882.5	90345.2	103417	111273	126807	107865	144673	107849	100247	104711	117827	86360	70271.6	93275.8	66330.8	104335	107781	99796.2	114368	86667.3	103849
BML-LCMS18-27.26-296.1643		86263.2	79859.3	89284.4	86089.4	74904.9	117385	129575	118436	129060	121712	151769	136647	109571	122550	125557	94458.5	56449.2	74214.2	54545.5	63251.3	102057	91077.3	101215	71182.7	88010.1
BML-LCMS18-30.59-288.2444		86237.2	82579.2	69797.8	72277.9	84446.7	10188.7	8929.42	7279.93	4817.77	5241.22	50222.3	24980.4	23185.8	25452.8	21399.5	88432.1	120395	114739	119030	112571	66356.8	56576.9	82328.5	63095.4	53918.8
BML-LCMS18-29.09-647.3668		85546.6	118919	169752	133819	142131	5956.38	9260.33	9286.61	6717.62	9518.82	266171	295164	305674	557525	600353	10978.6	22434.3	40617.7	11720.1	11774.2	41103.8	34760.7	42578.2	31360.2	31182.8
BML-LCMS18-15.66-636.2786		85495.2	99086.6	111292	88754.2	110209	11351.4	13229.8	16535.1	14448.3	12043.1	104934	135048	189489	182229	374007	39182.6	91199.9	173082	57053.9	84105.5	490567	448630	480870	324272	394187
BML-LCMS18-25.1-462.2626		85458	73629.8	75687.4	68847.1	69149.9	0	0	0	0	0	0	0	0	0	0	34748.4	69741.6	54523	65225.7	56493	49535.2	42391.6	50201.6	47236.9	35941
BML-LCMS18-15.67-210.1628		85169.7	67733.7	63927.5	84931.6	64735.8	6034.95	18979.4	11083.5	18429	14163.9	200905	504075	728575	1.05673e+06	1.0173e+06	54075.5	72622.8	82193.3	56261.2	116395	227693	262119	262785	241412	238242
BML-LCMS18-29.35-482.2619		85104.7	85529.8	99095.4	82647.3	81229.4	0	0	0	0	0	0	0	0	0	0	22235.9	52390.9	48361.7	23220.9	25943.2	35699.3	25544.1	34229.2	33666.1	29462.2
BML-LCMS18-27.28-364.2601		85037.9	69761.9	86712.2	75911.3	99852.7	15567.3	12717.4	12622.6	7549.17	1009.83	73122.1	93685.7	104026	173401	220384	27968.6	69861.6	102677	39157.8	43931.1	82814.1	88625.5	103015	87928.7	89775.8
BML-LCMS18-27.27-292.1997		84568	78340.6	77917.2	63202.9	95770.4	344322	487696	548653	390022	631244	84723.9	116721	37566.4	33796.1	0	46546.6	63240.4	81443	54399.4	50651.1	59555.3	43672.3	40904.5	40495	52789.7
BML-LCMS18-14.92-456.2015		84565.3	60217.2	49203.9	70168.6	50704.7	11537.8	21837.3	19787.7	19236.3	24077.8	142104	562990	884498	1.43694e+06	1.20553e+06	18100.9	17302.8	16875	18924.3	30148.5	213726	234378	240452	224568	229428
BML-LCMS18-19.26-618.2689		82878.1	61921.7	79648.7	71488	61353.2	44869.9	59342	52642.2	83646.1	36015.8	77957.6	57033.8	49382.4	59828.6	99740.1	79888.4	317718	324181	126880	156729	409678	380801	399362	272468	278065
BML-LCMS18-29.59-258.1972		82730.5	82956	89941.4	76039.3	98224.3	169572	211818	256611	190955	254841	84035.8	153844	86251.2	47126.1	5167.05	0	0	0	0	0	83521.9	73891.5	77762.5	65170.8	87195
BML-LCMS18-27.44-374.2993		82171.9	67955.1	92475.1	71720.1	90093.6	29003.9	31766.7	13952.1	12804.8	18838.4	49451.7	263815	403507	215729	131865	96077	57078.8	54438.9	90948.5	131083	53461.1	50510.1	57049	34163.6	52402.1
BML-LCMS18-16.33-412.1512		81841.5	76974.9	78014.4	80931.3	76719	60409.6	34504.8	51649.8	74941.7	27768.1	94186.2	143229	114997	57539.3	43259.7	51625.7	86367	83605.6	66032.9	82320.1	89008.1	78406.6	100124	100410	101314
BML-LCMS18-24.67-500.2749		81690.1	74693.7	73557.1	74850.1	79400.3	0	0	0	0	0	0	0	0	0	0	24991.6	21571.4	22628.6	30535.3	31065	72892.2	64364.4	81298.5	73292.3	70504.5
BML-LCMS18-8.01-538.1683		81455.9	55383.2	52065.7	63898.4	38941.8	35299.2	48715.6	45553.9	48507.9	47626.9	98557.5	216496	253679	217483	186686	63648.9	24239	23585.3	49270.6	75909.4	97374.6	104148	91638.4	93727.3	95642.4
BML-LCMS18-32.5-729.3856		81400.8	88148.6	121431	115353	120213	238500	127038	192232	73255.1	104868	2.29245e+06	3.02637e+06	799332	593009	757402	130926	478534	293778	275021	432163	118623	122530	158417	130367	140096
BML-LCMS18-31.54-608.2669		81152.1	109693	164909	155364	148134	13118.2	10045.2	8568.88	4204.3	6308.5	564138	1.32833e+06	2.72414e+06	6.68986e+06	5.85135e+06	9949.97	61576.5	55216.6	21506.9	20610.8	34555.9	34933.9	45496.2	33317	33607.9
BML-LCMS18-26.18-577.324		80960.6	58887.1	70015.6	87881.2	60305.7	0	0	0	0	0	0	0	0	0	0	109055	160322	90026.6	196859	179628	239617	230755	191582	253231	269960
BML-LCMS18-2.28-148.0504		80508.3	76267.5	82535	61030.5	62779	12648.9	31877.5	19532.2	23354.6	52637	18700.1	36630.7	31094.6	13794	27385.8	42050.8	128883	132022	68547.5	278924	220116	277675	210050	243824	247267
BML-LCMS18-33.03-264.2435		80301.2	82143.3	65698.8	61310.1	76537.4	0	0	0	0	0	0	0	0	0	0	8578.56	20792.1	16727.3	14284.5	12706.3	19154.5	15938.5	23544.4	19700.3	19144.3
BML-LCMS18-9.53-454.1119		79681.2	90243.1	87527.2	82287.7	75114.2	0	0	0	0	0	16371.9	33695.2	109494	39116.6	17781.2	136841	356000	387196	227592	397383	1.14574e+06	1.20355e+06	732469	1.02243e+06	1.19155e+06
BML-LCMS18-15.24-456.2011		79138.3	57900	48861.6	66107.4	54461.9	0	0	0	0	0	95113.2	275099	408209	566074	426116	18172.8	13632.1	25685.5	21963.5	19313.9	177171	208335	202156	171880	177396
BML-LCMS18-29.46-574.2641		78522.2	76170.7	71605.3	67866.6	64252.5	0	0	0	0	0	0	0	0	0	0	23168.2	53974.7	68587.3	51816.2	51247.8	61823.6	64177.9	86978.9	66336.6	67584.1
BML-LCMS18-35.64-840.5026		78203.6	80580	98566.5	116376	113884	10729.9	18644.2	22692.5	22357.3	17062.4	93697.9	94790.1	168259	232541	186928	10148.3	22267.6	51379.3	9658.1	26179.9	99167.8	74700.7	89638.9	67768.4	73043.3
BML-LCMS18-25.15-654.3808		77568.6	78209.3	87974.8	69522.3	81573.7	13495.7	8291.3	7630.9	9719.11	6679.1	83526.3	213621	150520	181198	156088	26842	20978.4	23349.7	16489	31938.7	65213.5	67300	62247	53134.6	44323.2
BML-LCMS18-32.37-290.2235		77480.1	120976	100773	56608.3	131634	269255	395962	417977	162302	487541	0	124715	67724.9	141938	38346.1	11642.6	9458.45	3964.88	868.887	8471.32	101263	145991	115480	84716.3	111092
BML-LCMS18-4.32-348.1685		77371.7	64098.9	116997	68909.6	85775.4	413163	733528	535875	480498	785104	137240	218315	130674	23104.9	31879.9	53107.8	98355.8	40788.9	38493.5	132208	16684.1	18654.9	31294.5	22114.1	22246.9
BML-LCMS18-15.03-1026.26		76867.3	62960.5	61462.9	66466.2	64284.9	1627.89	1950.11	1997.13	2215.95	1251.29	32753.1	79647.6	56566.5	48321.2	44247.9	281954	281563	268893	290341	376523	124118	104616	113770	102594	120232
BML-LCMS18-12.97-519.3206		76718.5	29462.6	10606.5	10950.4	9080.82	6682.13	8506.91	8938.03	91787.8	19261	95478.5	26572.8	7160.05	5333.83	6598.54	92262.6	14188.6	81311.8	22068.3	14934.3	20252.1	11266	9754.72	6792.39	8098.05
BML-LCMS18-28.79-474.296		76349.4	65185	67399.8	71280.1	66229.6	0	0	0	0	0	0	0	0	0	0	264270	74196.6	86840.3	200244	186702	91995.4	79989.5	96290.7	92523.1	81624.1
BML-LCMS18-2.48-394.1231		76297.6	55334.9	62994.1	48598.5	40851.7	279261	946263	492879	628565	1.01919e+06	226858	279245	410985	589475	873705	333311	708599	748244	509454	1.74368e+06	1.57323e+06	1.99155e+06	1.57751e+06	2.05451e+06	2.25719e+06
BML-LCMS18-11.47-472.1969		75843.7	69397.8	64721.9	68178.1	65214.9	19609	31710.6	25646.1	21202.9	31388.8	209622	290800	407475	376176	327061	33338.1	51292.8	65031.7	44671	75535	110499	107578	97429.1	90773.3	90783.2
BML-LCMS18-15.06-340.1353		75008.5	72426.5	74634.5	59887.9	47075.8	0	0	0	0	0	48228.3	68205.2	47530.5	12838.1	6799.48	40020.7	132147	105028	79284.4	109788	149943	145842	144915	152874	154065
BML-LCMS18-37.47-1017.614		74783.2	105948	172150	208525	253116	0	0	0	0	0	0	0	0	0	0	28713.7	161415	105731	122860	151919	29664.3	30256.9	46158.5	39725.4	42084.3
BML-LCMS18-13.21-558.1688		74612.5	80234.7	72746.1	75563.5	71675.9	228575	91369.9	107040	166200	130895	88825.2	166687	249357	119495	131011	31563.1	47338.3	62674.6	41381.6	71530.6	147209	171342	136268	143918	142247
BML-LCMS18-11.83-726.2114		74463.7	73282	77401.9	70807	60255.3	52310.5	100233	74352.3	76224.7	115249	74737.8	155098	164435	276894	355707	31820.4	37609.7	45992.9	43890.1	69696.7	120905	136063	124782	128321	118599
BML-LCMS18-13.86-542.177		74300.5	82669.9	73797.8	68531.6	79718.3	25628.9	19658.1	26103.8	42545.1	19281.5	33496.1	50624.2	41476.5	5287.53	5303.7	40650.3	30608.6	22106.2	34379.7	44906.7	62274.4	64909.7	61422.3	55819.6	60660.6
BML-LCMS18-13.12-726.2125		74049.3	66524.6	68292.6	61317.9	65327.5	69702.5	106350	86296.7	77524.3	112100	98469.1	195738	196389	236350	296020	29037.2	32909.6	46391.2	33519.9	59682.5	91211.7	108794	100658	89964.9	91795.6
BML-LCMS18-25.75-464.2758		74039.1	65230.5	69012.7	55710.6	62844.8	157705	111031	117637	123507	70954	246617	164779	96954.2	65454.6	63459.1	208836	250000	200698	154745	208748	67264.6	71479.2	321621	285543	69023
BML-LCMS18-28.96-480.3116		73391.9	71741.2	78298	69099	82126.2	0	0	0	0	0	0	0	0	0	0	57501.6	44040.5	42795.4	35619.4	37735.9	58919	47637.9	70375.6	55926.5	55634.8
BML-LCMS18-39.41-862.5572		73385.1	104941	145010	209572	322028	0	0	0	0	0	0	0	0	0	0	7004.65	9865.79	7623.56	10268.1	15477.8	19445.8	20951.7	33386.6	29483.4	31754.7
BML-LCMS18-5.17-406.0494		73336.6	99357.6	96317.6	94535.8	95732.9	295102	347870	305921	317084	302760	330960	228936	336325	394473	392597	30206	49676.8	82649.3	68676.6	82072.4	51303.4	51357.6	117368	109550	104947
BML-LCMS18-24.01-332.1652		72829.9	56542.7	52366.2	75024.3	45090.8	0	0	0	0	0	0	0	0	0	0	79408	77132.6	53400.5	87316.3	82247.3	246791	265459	263289	277586	300045
BML-LCMS18-28.91-528.3137		72781.1	63648.3	73358.2	72335.6	65594.5	0	0	0	0	0	63191.4	62000.8	68506.2	79746.7	82188.2	14321.9	23510.2	22181.9	18646.5	19740.7	46675.3	54891.1	68247.3	50403.8	47943.8
BML-LCMS18-35.7-674.5068		72210.9	50996.3	47032.1	57274	56000.2	96995.7	67971	76892.3	57259	68231.7	1.33206e+06	3.03881e+06	3.67718e+06	2.93846e+06	2.00305e+06	299816	232088	247706	406721	590824	187820	178621	187851	224905	234445
BML-LCMS18-13.09-700.1853		71604.9	61205.6	57936.9	51426.1	81414.2	0	0	0	0	0	0	0	0	0	0	0	0	0	0	0	14863.3	12493.1	9071.36	12832.9	16033.2
BML-LCMS18-11.93-344.1617		70373.9	75185.9	88219.6	69225	72759.4	258958	299396	336532	354403	292052	263712	389360	324004	108837	93945.9	63882.8	109055	74106.4	62315.1	147089	70021	76001.8	72917	71463.1	74908.1
BML-LCMS18-11.20-594.1583		69826.2	54296.8	52844.5	58797.6	48897	0	0	0	0	0	27441.1	105560	143133	228477	194873	114993	72099.9	79208.9	97000.5	142745	113894	113655	115867	119287	129064
BML-LCMS18-11.88-740.2142		69786.7	57671.1	55799.8	65151.2	55494.3	0	0	0	0	0	64076.1	189255	233134	224667	220920	83948.2	124730	219969	121092	162728	105664	97500	94772.8	105491	105019
BML-LCMS18-24.96-292.2021		69022.5	69013.7	82110.1	77865.4	88033	565775	385679	537561	468425	346401	150208	263145	230760	1.19115e+06	1.95162e+06	244201	908853	1.3195e+06	439466	467703	101787	94033.3	127352	79044.9	68331.1
BML-LCMS18-23.63-328.3083		68395.7	42827.9	89436	73235.8	58806.2	117315	75019.8	64935.6	54035.5	40367.2	41781.2	97377.5	39106.4	31364.2	65889.7	61039.9	79069.2	64616	76633.8	71556.3	49299	124484	96674.5	32616	74699.4
BML-LCMS18-12.82-900.2786		67869.9	58139.7	58171.5	60601.8	53749.2	4719	6208.93	6128.24	5862.05	5397.97	24775.9	48449.6	45741.5	37375.7	23629.8	45891.1	89519.4	106432	61416.6	108437	126464	134225	128189	125151	123266
BML-LCMS18-10.82-614.2773		67762.3	52962.9	79526.5	90320.7	94558.3	457645	1.0976e+06	809623	605164	1.33375e+06	130624	263941	176079	36094.1	38870.3	55969.3	106006	54585.8	47427.4	123236	28506.9	31497.7	23849.6	34168	35152.5
BML-LCMS18-34.22-526.3209		67418	72401.4	62318.8	50695.3	89929.7	0	0	0	0	0	0	0	0	0	0	0	0	0	0	0	28937	24976.6	33382.1	28617.5	25013.3
BML-LCMS18-32.06-284.2709		67331.1	65319.3	79042.9	117999	103587	201170	209817	209457	235180	213055	100965	130937	146372	168069	149879	175388	167397	196509	163041	237508	180850	149434	181216	132035	160165
BML-LCMS18-21.25-556.0995		67017	73796	81456.7	84536.7	75532.6	0	0	0	0	0	0	0	0	0	0	160310	171183	182545	161186	207956	133008	139483	136991	117718	122577
BML-LCMS18-32.88-722.3983		66982.4	56171.1	61660.3	60444.5	55226.8	0	0	0	0	0	0	0	0	0	0	70298.9	150967	102519	128775	146227	74075.4	56722.2	66560.8	64898.3	59919.5
BML-LCMS18-15.99-664.1639		66650.8	49229.3	39902.6	50401.3	41805	0	0	0	0	0	94952.7	126741	85700.6	27761.1	20956.6	41188.9	100821	100114	65651.6	90314.7	162264	147188	158309	153899	159704
BML-LCMS18-29.79-312.2658		66641.4	66880.5	80264.9	76114	76228.7	24934.3	19042.7	19040.2	25104.9	19044.2	45612.3	29786.7	28267.6	25440.6	26826.9	51082.7	36486.3	33294.9	41496	41235.1	55591.2	53216.8	67843.2	55647	56399.3
BML-LCMS18-35.22-1038.566		66418.6	74320.3	71433.1	77674.9	95845.8	0	0	0	0	0	0	0	0	0	0	74136.2	203392	125459	147480	184547	57962.5	39414.9	72477.7	57558.2	58950.7
BML-LCMS18-15.51-456.2017		66341.7	50884.5	54452.5	56805.5	52338.2	18370.9	23906	19434.9	16395.4	22615	101825	322771	464604	583694	516324	39708.1	87689.9	78940.6	63071.1	102924	173893	199783	171155	162319	173081
BML-LCMS18-11.94-541.2512		65782.6	60341	69283.1	61465.6	65518.8	234855	269918	294403	302094	272052	253619	376528	314526	104876	80785.1	55176.1	84686.5	53899.5	47880.7	109503	67707	58648.3	60026.7	58106.3	56756.8
BML-LCMS18-3.75-342.0978		64787.4	14720.8	1944.52	6977.94	48399.7	23682.1	112994	49020.5	62948.8	97649.9	12708.6	157570	152211	685001	454665	355935	1.10819e+06	729812	524082	1.50171e+06	1.23196e+06	1.60344e+06	999004	1.37948e+06	1.23324e+06
BML-LCMS18-12.95-534.1742		64587.3	62774.3	62738.8	65077.9	55663.8	9790.97	6025.07	9751.82	4927.29	6971.21	96430.2	118453	127752	99538.2	118344	32601.7	51765.8	69114.9	55487.6	82007.5	110855	116704	95856.3	96435.8	91814.5
BML-LCMS18-25.97-228.1342		64432.8	51883.3	49564.3	75217	63539.1	0	0	0	0	0	0	0	0	0	0	78306.7	142562	103872	118878	109543	259215	242508	275801	268519	298631
BML-LCMS18-31.95-312.311		63477.8	61854.6	69333.1	55475.5	49642.3	35468	27239.3	37420.9	29936.4	25379	17917.4	51883.8	41379.5	19561.1	25586.9	66331.1	62160.4	59470.3	43666.7	61102.7	87066.9	65906.4	62329.8	46439.8	49866.9
BML-LCMS18-7.5-552.1846		63070.5	51236.4	44065.1	50767.2	53672.5	22388.5	38136.9	28091.5	22480.8	49105.8	0	16336	12356.8	0	0	17293.1	15765.3	21894.2	16579	26524.3	99465.4	97122.3	109669	93830.4	96660.9
BML-LCMS18-37.47-762.4326		62899	88070.8	132800	155617	163176	0	0	0	0	0	0	0	0	0	0	31387.8	120200	100789	105704	127014	38637.2	34930.3	49010.3	44009.4	43987.4
BML-LCMS18-7.47-206.1277		62556.7	47533.8	57359.8	56174.3	47163.3	103068	175101	145557	143922	179964	105259	255654	398582	739101	736824	32238.3	48464.5	68151	37250.1	113442	91566.5	101530	98378.9	89724.5	77398.4
BML-LCMS18-9.33-208.1440		62532.6	51901.9	52489.2	49954.5	54233	0	0	0	0	0	173291	456442	590074	635005	446516	0	0	0	0	0	71849.4	76154.9	71428.7	67995.5	66466.4
BML-LCMS18-32.9-599.4172		62491.4	43910.6	47152.9	43170.3	43361.1	75992.2	82506.1	87804.9	100536	72019.9	327337	255828	96825.1	129789	111474	53195.6	56970.4	68342.1	59185.8	75292.7	125510	115568	111169	93638.4	93841.1
BML-LCMS18-12.22-562.1799		62011.1	58750.7	66240.7	62268	66387.6	5227.86	3932.78	6813.01	5986.45	1522.02	3121.86	15599.4	6682.92	0	0	1091.84	7412.89	3164.35	756.102	4645.54	16042.7	20519.5	16071.8	19931.3	23456.6
BML-LCMS18-2.16-348.1677		61952.3	56524.8	69886.1	56749.4	60727.8	107422	169695	106297	101430	161605	156174	118280	61175.2	0	0	18273.3	60109.8	27705	30450.6	84550.2	0	12634.4	0	20096.6	18562.7
BML-LCMS18-12.80-526.1841		61812.2	60596.9	62647.6	55418	47576.2	84361.7	131531	87542.7	95262.2	131859	92234.9	141792	97909.2	93799.1	115608	46473.7	65453.2	95080.8	69779.7	106795	131243	143809	158398	123856	129401
BML-LCMS18-12.86-742.2070		61470.4	55770.7	59185.5	58197.3	54340.4	6359.74	11447.4	7742.84	7761.58	14954.8	8624.71	22663.1	24171.3	27370.8	26615	32625.5	52886.1	62282.7	43824.5	62802.1	103774	106829	93352.4	85426.1	95175.2
BML-LCMS18-31.64-312.3121		61204.9	70102.6	91891.8	56242.7	42075.1	48588.1	35135.4	46238.7	30978.1	20918.9	15115	47251.3	55181.4	23620.5	24375.5	70274.5	76419.2	84365.7	54291.1	73752.6	97325.8	72389.2	68761.1	45400.4	43987.4
BML-LCMS18-7.05-416.0978		60992.1	55503.9	46564.5	39236.9	42895.9	59257.4	26507.2	59379.2	78097.5	45207.4	69998.6	40814.5	47415	15131.2	12481.6	34015.6	77843.2	83174.1	53551.7	81323	232038	299499	235028	235632	255336
BML-LCMS18-12.02-356.1297		60897.3	52172.6	59244.1	50633.8	45288.3	430373	313538	498862	650540	326494	53633.1	51335	30975.7	13051.5	12077.8	7081.59	23014.3	14014.9	17547	26270.9	67206.6	67095.7	61752.4	65058.3	65939.1
BML-LCMS18-31.59-306.2523		60818.4	72807.8	81978.4	67089.1	71681.4	146773	211433	219681	130335	160300	287791	397418	393517	498976	576265	40309.7	58389.7	55636.2	40701.5	47491.2	80430.7	80638	85624.1	70797.1	77123.6
BML-LCMS18-21.41-618.2992		60679.2	45708.8	58577.4	88472.5	36764.9	9457.81	19221	9313.68	11435.8	11940.9	0	0	0	0	0	299374	86072.9	60464.9	241825	184972	492519	522284	448482	618434	644507
BML-LCMS18-37.47-722.4121		60385	79761.9	118075	136652	145677	0	0	0	0	0	0	0	0	0	0	29866.2	102827	89363.6	94813.3	111516	32025	31527.2	51167.7	40050.7	42993.8
BML-LCMS18-10.38-459.1370		60299.8	35745.6	16901.3	21851.6	10855.7	20638.7	39545	33920.6	51290.7	36777.3	109798	132789	117959	58340.9	42935.9	74261.5	298287	205675	130353	238049	870785	968398	865685	815910	714137
BML-LCMS18-29.6-349.2975		60294.9	79374.4	62057.4	94282.2	90604.7	12369.3	15709.5	9695.57	7854.72	9943.46	0	0	0	0	0	7358.92	16107.8	19159.3	11116.9	12790.2	45262.5	32797.4	73881.7	38052.5	31911.7
BML-LCMS18-31.38-302.224		60034.5	68521	72089.9	66653.8	74313	168865	213715	246981	200396	234016	90987.4	94539.1	46255.4	35591.9	23822.2	3178.85	3662.01	3319.56	1299.51	4690.48	54409.9	47459.2	57973	41537.5	50214.1
BML-LCMS18-23.68-631.2243		59354.2	46134.9	55327	74593.9	41674.5	0	0	0	0	0	0	0	0	0	0	0	45649.3	30899.6	60616.8	43170.4	144843	170972	204100	203433	207267
BML-LCMS18-29.21-736.3429		58952.8	58785.1	55611	54804.1	59437.1	0	0	0	0	0	0	0	0	0	0	10765.2	13472.6	13696.6	12084.8	14947.8	35938.3	33692.7	44493.2	35767.3	36448.5
BML-LCMS18-30.1-612.3305		58735.1	77786.6	90364.6	93109.8	99326.3	43144.9	61522.6	71238.4	43670	44502	2.49955e+06	2.37239e+06	2.04837e+06	3.18265e+06	3.40537e+06	44771	61071.5	103175	45059.7	69528.4	0	0	0	0	0
BML-LCMS18-14.18-588.1851		58434	44448.6	34426.1	44924.5	32912.3	0	0	0	0	0	170596	174578	94010.9	23780.6	12933.9	0	25390.3	18002.8	8956.01	24138.7	98689.5	90956.1	105589	88026.3	90347.7
BML-LCMS18-26.71-510.2597		58400	49214.5	58643	46579.8	44814.8	0	0	0	0	0	0	0	0	0	0	121014	172901	142492	143773	165745	115839	89985.6	109933	96199.2	97659.6
BML-LCMS18-25.08-422.2651		58340.8	56282.5	49873	50532.3	52925.9	0	0	0	0	0	123424	54077.2	40441.7	26287.8	52641.5	71220.9	103133	78981.6	99860.4	88656.1	66831.1	56982.8	71021.6	61939.4	61789
BML-LCMS18-32.3-729.3864		58289.6	44553.8	64727.9	75999.1	73887.8	260420	163135	241322	104655	130573	1.78327e+06	2.17793e+06	520755	347601	411323	94886.8	265950	259660	183305	269119	91768.8	76523.4	107949	97140.9	100259
BML-LCMS18-31.52-606.2518		58243.9	63641	67847.3	75565	72199.4	3935.33	10066.5	4916.8	1012.44	4130.99	820780	812984	902414	802667	531499	0	0	0	0	0	12969.9	9899.23	16444.8	11452.4	11081.9
BML-LCMS18-30.85-156.1059		58072.9	53116.3	61512.1	63078.6	49848.6	0	0	0	0	0	0	0	0	0	0	96746.4	69631.8	33766.5	105442	89941.8	41800.6	46824.9	45595.1	53422.1	66991.9
BML-LCMS18-36.04-674.5066		57916.4	41235.1	40376.1	48787.6	39218.1	52187.5	37409.5	41056.6	17009.3	34866.6	688525	1.97227e+06	2.71901e+06	2.0065e+06	1.38571e+06	196348	217874	180611	280327	450240	133157	136385	135096	155472	176502
BML-LCMS18-28.96-502.293		57888.4	55509.3	59684.6	55299.3	63202.1	0	0	0	0	0	0	0	0	0	0	31729.1	29592.2	28928.7	21930.8	61294.8	45113.4	41508.1	57300.2	43609	44627.7
BML-LCMS18-25.73-519.3273		57815.7	56869.7	63389.7	53015.5	58194.5	78923.9	65414.4	62667.7	77808.2	49106.3	224707	139065	79756.7	68927.1	65360.7	99307.6	142128	124592	104035	160125	46847.3	48520.2	52955	44626.6	41592.2
BML-LCMS18-37.19-616.5031		57779.7	74669.6	92330.2	83069.2	137259	7307.12	14929.7	10421.3	11825.6	14029.1	6847.92	28628.5	47434.3	88568.1	113923	43910.4	81018.1	67047	80986.9	105304	31142.2	27620.2	38243.7	26770.5	24465
BML-LCMS18-33.25-284.271		57691.9	56627.9	53638.2	63854.1	53766.2	92834.8	89584.7	88597	78321.3	64273.6	54941.5	128666	169293	249339	239589	140341	165996	213404	198906	258024	124786	104825	123692	90052	99654.9
BML-LCMS18-15.37-864.21		57648.6	47261.7	50482.7	58661	59593.7	0	0	0	0	0	28570.5	57362.9	28235.7	8092.73	7342.93	132982	162456	168215	146350	243834	75074.2	90203.5	81306.7	76254.8	74155.7
BML-LCMS18-25.62-528.2976		57002.1	58791.9	57084.3	44080.6	58760.7	12791.3	12712.9	14998.1	15161.2	8251.38	248624	237177	256889	427981	311857	3752.06	11832.4	12819	3227.36	7192.32	26948.5	26113.9	27214.2	19221.6	16012
BML-LCMS18-3.73-162.0324		56926.1	38689.3	24923.3	30490.5	37085.6	47295.6	124784	87513.8	100585	123652	49687.3	158565	168337	402638	316522	171694	527778	392373	279883	786747	529139	681641	476397	659828	601259
BML-LCMS18-25.7-636.3507		55650.3	55327.5	60983.5	44738.8	53683.7	78866.6	59245.3	66167.8	102116	55267.7	191350	111955	60371.6	53678.5	54567.5	126181	185181	159032	134308	185023	44991.8	54578.7	60577.9	54864.6	44810.3
BML-LCMS18-25.12-276.173		55112.5	61171.4	65883.4	62888.3	87193.5	26386.7	28443.7	31409.3	14305.7	14244	468345	300619	178817	222127	171989	0	0	0	0	0	22125.3	18518	23363.2	22210.9	23151.2
BML-LCMS18-18.74-700.1421		54138.7	24087.2	11571.4	26947.9	19133.9	0	0	0	0	0	33543.1	59197.6	69352.9	38353.5	28495.8	90260.2	99092.4	96947.8	170199	147183	127996	118924	134700	126809	120428
BML-LCMS18-24.74-280.1502		53959	52551.4	53699.2	53994.5	57300.1	135190	87882.3	86322.9	69016.1	81613.9	50594.7	103627	57753.2	55068.4	76329	205599	175670	173491	202980	277133	59341.6	48856.5	63583.5	53173.6	34986.2
BML-LCMS18-2.48-354.1314		53909.8	46361.6	46545.6	33737.5	29488.2	151878	438063	244663	353443	520786	164538	177367	287840	439765	582752	171421	320537	351077	229273	792327	766060	1.02674e+06	663260	1.06522e+06	1.1733e+06
BML-LCMS18-32.91-396.3755		53802	52092.7	62442.1	67331.4	67349.8	89952.7	110737	104261	108072	93291	27748.7	76504	72452.7	79474.8	106075	97582.5	105820	119500	120068	130246	108262	99492.2	118046	94918.9	98666.3
BML-LCMS18-22.20-372.1571		53739.4	46046.2	51589.1	66235	40530.5	0	0	0	0	0	0	0	0	0	0	151714	77495.8	47261.2	145927	122599	123107	114045	114043	133671	129534
BML-LCMS18-29.59-614.3457		53320	70575.7	90658.9	69893.6	76878.9	79630.4	138452	156150	88215.5	134450	3.93727e+06	3.56374e+06	2.85715e+06	4.34314e+06	4.85602e+06	0	0	0	0	0	22734.9	22379	26425.9	17809.1	25531.6
BML-LCMS18-7.04-403.1841		53208.4	42727.3	50026.9	38744.2	27963.9	65228.7	104845	75007.2	91529.2	97765.8	134092	133058	185747	89511.3	68770.8	52801.2	51613	55353.9	40360.9	72600.9	133138	134037	167378	105267	94044.2
Dihydroamentoflavone-hexoside I	biflavonoid glycoside	53117	49512.9	44211	49022.5	46083.1	2560.89	3727.1	2740.43	5375.92	3713.31	17774.5	40633	28924.2	8869.46	7323.73	132303	174445	143494	148575	229005	88611.5	81497.9	82817.5	83128.7	88429.8
BML-LCMS18-21.99-396.1941		52256	133311	210707	89257.2	269883	2.51664e+06	2.56793e+06	1.32612e+06	1.96845e+06	1.92445e+06	353725	1.97016e+06	1.21536e+06	560791	1.03674e+06	6.98924e+06	9.55438e+06	6.39425e+06	8.03634e+06	1.00592e+07	211222	91733.5	451797	203638	99586.4
BML-LCMS18-10.55-630.2764		52208.8	52804.3	75693.1	54281.3	81166.6	91752.8	180196	117703	80268.3	238153	13694.2	38081.1	28926.3	0	0	53430.5	150915	73703.3	45148.7	146772	18040.9	20149.4	18949	16045.9	19089.2
BML-LCMS18-35.22-859.5413		51661.6	52943.8	68914.4	54623.4	62957.7	0	0	0	0	0	52330	91378.4	158887	187937	159820	0	0	0	0	0	0	0	0	0	0
BML-LCMS18-32.23-348.2628		51561.5	78718.6	80600.2	57166.4	56877.7	7755.54	9324.16	4627.35	1314.73	1861.84	87245.7	164891	269683	100264	64463	26042.4	31623.7	22187.6	26902.5	31163.8	4605.03	1913.65	1805.17	1914.79	5972.77
BML-LCMS18-26.18-542.4868		51195.3	36274.2	48736.5	67725.7	47202.6	0	0	0	0	0	0	0	0	0	0	90761.5	156751	73471.2	206852	174454	265591	264163	249011	335866	348566
BML-LCMS18-37.02-769.5674		51040.7	68663.1	89334	95959.1	137107	39333.9	32686	32872.4	36674.3	30986.1	63374.5	131149	167477	174797	153488	33086.6	137193	177030	120895	150593	78113.3	66325.7	91529.3	68808.2	76515.4
BML-LCMS18-37.48-354.1477		50925.6	64627.5	84876	88486	86568.1	0	0	0	0	0	0	0	0	0	0	22178.6	56924.7	52241.7	54135.7	61297.1	32873.1	29360.4	47829	39313.7	41472.3
BML-LCMS18-8.39-798.2059		50848.1	81162.3	89336.5	64780.1	121228	6571.22	25938.2	14997.4	3184.64	9368.44	357647	315064	269113	15599.5	0	0	0	0	0	0	0	0	0	0	0
BML-LCMS18-33.56-835.5454		50725.9	52714.1	58088.8	56830.1	53758.9	9865.55	14439.2	12876.9	16255.5	12621	106552	161268	154728	132077	132258	2890.49	155298	458681	60790.5	227377	83641.4	80849.8	78097.4	67733.6	73030.7
BML-LCMS18-3.90-406.2216		50667.7	41116.9	41205.5	43535.7	32163.1	0	0	0	0	0	28902	174726	254597	349924	235463	0	0	0	0	0	102245	125034	120290	116904	116242
BML-LCMS18-27.66-248.1765		50475.9	53035.6	48229.1	49660.7	52816.7	166772	330262	269463	183023	361829	34846.1	96183.1	56762.7	31156.1	14782.1	4049.71	5447.4	4411.23	849.574	6608	46035.3	47099.7	47019.1	44712.1	47376.6
BML-LCMS18-25.05-266.185		49917.1	50404.2	48859.7	52215.9	44529.2	0	0	0	0	0	45462.3	28457.5	18647.2	22976.9	19174.9	128973	46252.4	10861.5	102060	80059	26750.9	26883.4	32216.6	37445.3	36037.2
BML-LCMS18-37.99-802.5553		49739	71639.1	87117.2	90562.4	135172	11068.1	12038.1	11169.8	12841.2	17865.3	6360.29	20643.3	26687.3	49018.3	44472.7	23747.9	71977.5	71224.5	76858.6	83720.8	56254.3	38913.6	69722.9	53853.8	51997.1
BML-LCMS18-25.97-631.2234		49544.8	41289.8	42456.9	56076.2	52705.4	0	0	0	0	0	0	0	0	0	0	0	54695.3	49405.4	36384.1	19249.3	135859	153825	226434	164424	185946
BML-LCMS18-25.51-578.3059		49471.3	52087.2	54470.6	57282.7	60538.5	7078.62	5514.93	4665.56	3056.68	3085.29	117060	236450	145337	182939	189938	12816.7	11431.3	21513.4	9826.47	13051.2	33000.2	33295.3	35764.5	28892.3	26659.1
BML-LCMS18-15.51-208.1436		49440.5	37807.9	33740.8	50521.3	35481.9	0	0	0	0	0	81739.2	221358	301096	317510	249362	15584.4	50699	52667.5	24868	63697.4	103064	122807	121433	109940	114262
BML-LCMS18-2.75-514.1707		49273.1	36620.8	50809.6	53847.9	68311.7	34229.3	119128	31438.7	27738.6	39502.4	92225.7	164535	465491	1.03939e+06	838831	3969.21	82211.3	101887	66365.5	119773	72762.4	94177.9	104134	89689.4	79224.7
BML-LCMS18-21.98-396.1943		48864.4	126732	200687	85878.2	251065	2.29433e+06	2.34644e+06	1.2189e+06	1.78744e+06	11252.7	333277	1.78875e+06	1.11913e+06	525332	955613	6.40525e+06	8.62592e+06	5.82728e+06	7.33323e+06	9.05811e+06	201740	93690.1	421348	195682	92660.7
BML-LCMS18-16.89-204.0791		48606.6	59663.8	50251.4	44699.2	55222.5	8212.55	4248.82	15644.9	27934.8	6949.26	0	0	0	0	0	47852.9	61201.3	39186.4	51252.9	51149.3	17594.9	16020.3	20123.7	18443.6	15191.8
BML-LCMS18-14.32-877.334		48249.5	47265.6	49336.3	45385.7	43977.1	0	0	0	0	0	7118.77	10117.8	10890	11841.9	10372.1	34944.1	65088.8	74801.2	42685.1	60550.4	107848	116660	99766.4	102182	92919.1
BML-LCMS18-29.62-606.3369		48156.2	72248.1	90565.3	81885.4	77472.3	43818.3	55050.2	67302.9	54822.6	63842.7	369889	439441	339131	438885	349487	66849	87998.8	110936	58330.2	85829	48521.1	40431.4	55846.6	40608.8	32547.6
BML-LCMS18-22.7-412.1567		48124.8	54231.5	49705.3	47969	47305	0	0	0	0	0	0	0	0	0	0	0	18661.7	0	6967.62	0	21326.6	18091.4	28319.5	19319.7	15379.4
BML-LCMS18-23.79-558.0877		47804.2	54292.8	56456.2	51392.3	58024.2	0	0	0	0	0	0	0	0	0	0	44760.8	89081.4	98841.5	88842	120655	72698.6	89329	112200	87304.8	95851.6
BML-LCMS18-35.34-748.51		47628.4	57928.8	68015	75234.6	73907.5	9837.81	10421.9	8259.28	7022.93	7027.94	105938	207623	187111	174518	154385	65314.7	179831	172710	167323	254824	103416	97133.5	83059.9	87568	81806.5
BML-LCMS18-25.01-310.1547		47511.6	115280	82919.2	25256.2	107714	1.9342e+06	1.23989e+06	1.36789e+06	1.4835e+06	606696	77469.3	207383	72046.2	84082.4	207125	1.29208e+06	2.27618e+06	1.53168e+06	1.57882e+06	1.97211e+06	49599.2	17452.3	172565	69319.6	18762.7
BML-LCMS18-13.01-392.1823		47502	35632.7	29431.4	43618.5	30994.5	13637.3	24581.7	18134.7	14417.6	26146.7	73238.7	294289	412868	740259	633933	7079.49	9445.26	15208.3	14125.7	23544.2	106309	133434	119633	121643	133310
BML-LCMS18-30.9-440.253		47419.3	48349.5	46710.5	69421.2	57968.4	83202.6	97847.6	95077.1	105950	104277	75961.9	97178.5	91868.3	99780.8	88805.9	93009.1	71090.7	90460.8	71772.2	98979.1	85312	69860.2	84622.8	60987.2	80382.6
BML-LCMS18-12.19-546.2044		47381.2	43948.4	46676.9	42329.8	42895.3	13840.1	16176.6	21401.9	25530.1	11060.5	60918.4	51978.3	25220.1	4551.8	5311.11	7610.88	10456.2	6281.08	6002.21	16803.4	36585.3	37377.8	34372.2	30629.5	34285.6
BML-LCMS18-34.97-833.5288		46947.6	49719.5	47720	71639.3	71458.7	6714.55	6129.96	11484.1	12194.5	9196.86	96554.7	120400	228404	297537	196644	4266.05	12230.5	17938.4	6682.59	8150.35	46109.4	36805.9	48795.8	34662.2	37200.4
BML-LCMS18-17.88-268.1636		46354.2	29126.2	39613.9	57460.5	28203.5	0	0	0	0	0	0	0	0	0	0	25936.3	47028.1	20460.9	54078.2	50049.7	151548	138689	135234	156738	153652
BML-LCMS18-38.09-395.4142		46295.5	69099.2	74993.4	79426.2	85464.5	42019.8	40968.3	58364.4	42141.3	41127.8	0	63327.3	44983.5	32999.9	39115.5	57324.5	108448	104828	94278.5	120886	79801.5	66367.9	71235	51481.2	62989.1
BML-LCMS18-23.22-410.2095		46018.7	84308.8	91271.1	31610.3	83269.9	6.00454e+06	4.83853e+06	2.91079e+06	3.78488e+06	3.80891e+06	160339	759556	511564	216685	303736	1.55565e+06	2.41693e+06	1.887e+06	1.84542e+06	2.37049e+06	81460.8	37386.8	275591	87516.7	33871.7
BML-LCMS18-26.18-631.2225		45963.8	33584.6	34996.1	46707.3	34988.8	0	0	0	0	0	0	0	0	0	0	46535.3	74933.8	59500.9	92206.2	97673.7	95610.7	112124	158513	136409	132873
BML-LCMS18-22.2-556.1361		45957.3	32720.1	29534.8	42043.9	22801.6	22115.1	7430.31	6402.48	5763.96	6416.74	11776.4	71248.8	95548.7	220754	283892	0	0	0	0	0	181266	211084	188540	187641	179647
BML-LCMS18-27.61-582.2801		45872.1	34019.3	42309.6	54433.9	35366.4	0	0	0	0	0	0	0	0	0	0	153039	90262.3	47395.2	195930	124883	154484	128428	179076	195128	170831
BML-LCMS18-12.95-474.1583		45424.7	39828.7	34899.5	40172.7	33606	17599	1250.02	2118.26	7152.24	5091.95	92536.6	236592	274580	215767	168784	6402.39	37041.7	52201.2	36851.4	60852.7	58670.4	66412.9	58322.9	65288.7	59734
BML-LCMS18-24.76-486.2604		45328.7	41405.2	46318.3	48168.8	38621.3	0	0	0	0	0	0	0	0	0	0	123885	122002	80894.7	156108	140206	121477	101864	111167	118079	125997
BML-LCMS18-29.64-324.2244		45116.6	52021.5	52063	47525.7	50468	30462.6	23553	28890.1	20648	31011.2	405587	447038	227532	132139	89130.6	0	0	0	0	0	14237.2	10823.7	14422.4	10739.8	13317.8
BML-LCMS18-26.03-366.1476		45067.5	43703	26199.8	45849.5	35170	0	0	0	0	0	0	0	0	0	0	0	0	0	0	0	51793.7	51981.9	67845.9	51613.9	54422.1
BML-LCMS18-12.02-516.1624		44846.2	44498.2	48998.8	46805.7	43600.6	15199.7	10638.7	23227.4	17854.2	8831.31	68170.9	116522	124025	95145.6	83238.9	59976.1	116990	149054	107078	145111	55340.9	58161	54878.7	53348.8	57768.4
BML-LCMS18-9.72-162.0676		44815.1	32969.4	35555.4	46296.9	25449	31766	39750.5	46380.5	83895.5	58752.7	98065.7	142414	122117	113859	117789	28838.3	73243.6	64007.2	25976.9	62192.5	169177	195863	236703	204105	184189
BML-LCMS18-36.32-520.4073		44637.4	46208.6	51091.8	51487	46548.9	7640.26	13544.6	10649.5	6351.4	10420.9	0	0	0	0	0	165401	220546	230604	175068	223580	65710.4	62409.1	56131.5	55535.6	59312.9
BML-LCMS18-25.62-531.3345		44454.3	36731	43324.9	57915	31688.2	0	0	0	0	0	0	0	0	0	0	17639	59807.9	28587.8	61942.5	44232.4	170796	173672	171675	227296	216588
BML-LCMS18-30.43-255.2544		44432.2	33631.8	12850.6	22836.2	15887.6	10401.7	9116.2	22552.7	22761.7	11484.6	57780.5	32361.1	14143.4	13366.9	9843.59	118387	57859.5	70304	82880.2	87981.6	64785.9	28231.7	30344.1	16395.8	16653.3
BML-LCMS18-25.53-654.3792		44359.7	45286.4	51745	49194.5	50653.5	2825.69	2156.08	1393.2	2866.01	2033.92	91281.9	228482	145672	142770	121071	9835.47	6040.02	7995.45	6724.65	9547.33	21182.2	18881.1	21479.9	15313	13530.5
BML-LCMS18-3.89-428.2021		44165.8	29168.5	27906.7	27990.3	43597.3	0	0	0	0	0	37775.4	178902	261499	349027	216443	0	0	0	0	0	93794.7	111678	87644.6	121927	99366.2
BML-LCMS18-36.77-396.4065		43738.6	60228.3	70474.3	61176.2	47306.2	45159.1	36011.3	51826.7	32772.4	22221.7	5214.71	45929.6	42361.5	27142.3	30936	47266.8	72678.1	78844.2	53064.2	69211.5	78919	65514.9	64528.5	45423.9	48451.5
BML-LCMS18-31.83-358.307		43576	47033.9	67589.8	78892.7	71430.7	165601	140831	158631	177397	133927	115261	175397	187545	188638	164017	221221	115759	129700	145768	185223	112996	103758	131482	92624.4	98367.6
BML-LCMS18-26.1-620.2737		42822.6	39007.2	35628.3	42780.9	48722.7	123629	85181.6	114917	76189.6	61083.5	0	0	0	0	0	91333.1	141118	89995.9	88139.9	114974	56070.2	63137.2	63984.8	58583.5	53655.4
BML-LCMS18-8.39-226.1526		42579.2	38700.2	38720	36626.6	37856.4	0	0	0	0	0	79708.2	102601	135403	370031	418196	76419.2	99972	96571	94561.4	161704	72011.6	67922	65577.6	72329.9	60211.1
BML-LCMS18-20.48-402.1673		41997.8	32410	38184.3	58429.3	31633.2	0	0	0	0	0	0	0	0	0	0	99389.1	57636.6	33843.5	103150	92345.2	145131	146319	129962	162581	162850
BML-LCMS18-12.55-474.2102		41671.1	37754.7	33864.3	40035.3	32488.8	12348.5	33770.7	18853.5	16554.2	33427.5	164941	399009	627534	447339	350267	17759	10873.7	9045.09	15375.8	19868	59230.3	61372.5	75313.4	45766.8	46865.9
BML-LCMS18-30.39-418.269		41626.7	23874.2	24968.5	46885	40949.6	75735.1	52836.9	63927.3	38197.8	41946.7	981825	515290	197290	182865	198988	59561.7	88328.2	130875	78013.6	105878	61376.2	48463.2	55844	53715.6	62151.4
BML-LCMS18-25.12-326.2095		41621.6	45305.6	55779	51229	68008.1	26476.7	19576.1	27275	10093.5	8970	348271	228147	152088	173264	153556	0	0	0	0	0	16301.5	15106.1	15431	11182.1	13317.2
BML-LCMS18-30.27-334.2004		41523.7	69169.1	99744.8	63470.6	88431	23542.7	35319.4	55083.3	30426.6	42914	150221	192776	77628.1	45027.1	28835.1	17095.4	13574.6	18493.5	11754.7	16323.4	45782.1	28319.9	24163.5	20238.1	26762.2
BML-LCMS18-25.97-194.0578		41386.2	32488.4	32198.2	44588.5	39827.1	0	0	0	0	0	0	0	0	0	0	15121.5	75248.4	49979.5	54108.2	44999	136669	133343	151956	149283	155011
BML-LCMS18-5.02-709.2378		40683	77322.6	80535.9	50973.5	58452.8	0	0	0	0	0	0	0	0	25800.2	0	0	14396.7	22456.2	17339.6	21958.6	138621	150144	128365	123367	125612
BML-LCMS18-37.92-998.5712		40504.5	54439	99198.9	163964	211400	0	0	0	0	0	0	0	0	0	0	36870.2	198812	129463	183106	268650	40649.5	41320.7	64074	48722	55216.7
BML-LCMS18-35.1-337.3333		40475.1	46628.5	426048	180722	346928	87644.8	303538	182694	93040.5	75861.2	1.31066e+06	151340	172103	125967	111976	74358.4	79620.9	83719.3	378450	219170	193944	221360	188653	677628	341501
BML-LCMS18-9.65-450.1146		40106.2	23866.5	19905.7	30490.3	15663.6	34081.1	32924.5	48852.3	118298	52051.3	80214.5	105747	35714.1	7138.38	2800.45	31122.1	107125	101911	53558.4	122142	530523	543766	666899	496199	434150
BML-LCMS18-18.21-198.1259		39601	44735.4	47319.3	50486.4	71310.5	27340.3	21169	20699	11633.8	17007.6	112423	96329.1	62780.2	82164.7	168753	89697.4	122302	177190	171742	221492	11439.9	8925.22	14544	14875.5	13499.3
BML-LCMS18-27.19-280.238		39444.8	30899.8	55412.8	33609.6	30343.4	0	0	0	0	0	35444.1	58742.2	57052.5	22562.4	57431.9	187736	232753	256545	266470	333380	53265.9	52777.1	49241.5	56902.8	56578.4
BML-LCMS18-37.73-754.5574		38591	54842.8	80724.5	97441	141669	36263.6	62839.4	49143.6	56370	60352.2	46554.4	130130	150742	201974	197517	64543	183303	215934	202150	250781	95083.4	70126.3	99606.2	80605.6	83522.6
BML-LCMS18-28.73-582.3158		38539.8	35751.9	36944.8	35473	31829.8	53518.6	57865.1	59455	85068.1	51080.9	351704	450059	327421	385412	318557	49519.4	57525.9	54645.4	49373.6	79105.2	38327.3	26625.7	38235.5	42348.6	33610.2
Dihydro-O-methyl-amentoflavone	biflavonoid	38250.7	33031.7	32482.2	43744.6	30310.2	55463.7	20748.9	13575.3	11161.6	28202.7	49066.3	298974	449911	1.14464e+06	1.83262e+06	12343.4	10225.6	8684.94	10932.7	22653.4	160719	126590	150894	112741	107721
BML-LCMS18-13.82-742.2789		38192.4	32780.1	37294.4	35525.8	39671.4	58399	120938	110954	96158.7	89592.6	366996	657939	528427	167100	135789	56188.4	132614	85452.1	85693.1	179930	65936.8	60658.5	55569.9	74023.7	69551.9
BML-LCMS18-28.78-348.2648		38147.2	44576.2	48045.6	24678.1	35666.3	71056.3	129896	87423.1	56258.5	90688.7	42798.5	68700.5	138324	210456	179131	0	729.649	0	627.382	0	18013.8	25258.5	19223.2	26140.6	26373.1
BML-LCMS18-18.16-481.25		38007.6	31528.2	33831.3	31137	31346.7	16240.3	27878.9	26083.5	28250.6	25593.6	56537.7	74748.5	85726.7	76108.8	75138.3	2834.12	6867.37	9115.05	5225.06	8572.4	40178.2	43694.4	40957.8	36001.1	34318
BML-LCMS18-7.49-224.1375		37921.7	31003.8	32350.5	32527	26510.9	58759.6	106584	86559.2	73771.1	112708	69663.7	197048	300843	577518	578312	0	0	0	0	0	54255.3	61450	52347.9	53789.1	46275.8
BML-LCMS18-30.02-583.3477		37729	26982	21044.6	18287.7	18711.4	29957.2	20036.4	24083.5	21367.1	12960.1	576109	358989	245434	267161	209943	58719.9	141437	97823.5	96979.5	135302	33741.3	36072	38465.2	44310.5	38007.8
BML-LCMS18-23.68-600.4977		37675.4	20622	46892.4	56895.9	19323.7	0	0	0	0	0	0	0	0	0	0	51149.7	58887.4	21512.9	78911	79950.6	231788	225102	212957	239251	256691
BML-LCMS18-2.47-388.1206		37474.2	22613.9	35950.5	29745.3	14926.4	71049	180875	67381.3	110446	192990	32988.3	106306	155991	119029	255024	28970.8	68582.6	72932.9	47261.6	144564	233538	282082	244413	342471	364793
BML-LCMS18-25.79-253.1799		37137.1	27221.5	32837.9	43726.3	23631.4	0	0	0	0	0	0	0	0	0	0	86062.3	70379.2	50948.8	108493	75746	59731	55505.6	53431.7	67846.1	75078.5
BML-LCMS18-13.68-370.1992		37107.4	38989.5	36445.3	43706.1	37378.5	0	0	0	0	0	50108.3	145861	220715	312962	242719	38565.5	98383.2	79010.6	72659.7	104490	81509.2	88684.9	92034.6	83000.5	90835.6
BML-LCMS18-33.63-978.5697		36722.4	40474.6	61547.8	65807.3	55389	0	0	0	0	0	10190.5	26418.7	29018.8	21779.7	18907.3	206259	314088	191023	321144	324059	171452	164178	157213	178808	179494
BML-LCMS18-11.82-721.2553		36617.4	28253.4	31574.7	29684.6	30241.2	34844.7	64436.7	47280.3	50040.5	71090.1	31893.4	69480.2	68832.3	129531	163777	14794.8	17694.2	20008.6	18232.4	28482.3	54755.1	58061	53515.8	54077	49761.8
BML-LCMS18-39.58-504.4131		36515	46959.3	58797.5	107401	98787.8	46954.6	52087	52616.6	36602.7	38876.1	0	0	0	0	0	48309.8	120984	154909	129096	222284	109930	94789.5	148360	116525	126686
BML-LCMS18-13.85-210.1592		36325.5	27690.8	26361.2	35481.6	28647.8	0	0	0	0	0	79202	189678	241880	418161	430288	66529	79309.1	111618	106296	158202	75657.1	78436.6	80792.5	70386.3	77425.8
BML-LCMS18-13.69-392.1828		36314.9	34057.7	30614.7	39198.3	34188.8	5223.49	4267.56	3844.96	3708.59	3258.06	41201.8	134618	187809	252651	208258	37564.8	82442.7	86744.3	67399.5	94760.8	79273.8	84112.4	84943.1	79637.5	86245.2
BML-LCMS18-11.70-474.2120		36258.5	35425.9	42740	42219.3	37362.8	0	0	0	0	0	105641	129657	216946	201864	203599	41556.4	63313.4	63945.7	59347.3	94349.7	88689.8	72000.4	77269.7	70114.2	58524
BML-LCMS18-13.72-558.1712		36165.1	32625.4	37285.5	35292.6	33007.4	66479.3	49092.2	65862.2	88821.3	45086.8	29297.3	46633.6	41700.8	30315.1	23358.3	55355.2	41216.2	43425.5	50098.1	64859.1	53785.7	56954.2	48615.9	53125.5	46382
BML-LCMS18-9.85-744.2221		36155.8	28896.1	31049.5	31210.4	26117.4	50465.4	105126	73439.8	71938	121761	43730	121979	203118	327462	433440	15504.4	22125.8	21401.5	17944.2	38147.4	92400	107544	85022.9	95492.7	90473.1
BML-LCMS18-32.24-584.4011		36010.2	39942.7	43982.8	43087.3	47775.9	44164.8	52145.2	45010.5	51073.3	41432.8	12973.9	27756.8	31586.4	37984.8	49443	91094.3	104063	111081	104163	112049	47287.2	41162.5	47957.9	35327.9	35335.8
BML-LCMS18-29.61-295.2493		35974.8	38481.8	39796.7	32861.6	35050.8	10206.9	0	11866.3	9343.18	7679.99	143783	139161	92009.9	73624.9	71144.1	4104.8	5393.55	5825.33	1159.51	6446.33	12031.6	9695.98	11341.2	8444.73	8896.84
BML-LCMS18-24.25-315.3131		35737.7	37548.3	37446.4	37915	85064.7	53638.7	182692	61081.6	21429.4	53326.5	36113.4	43097.7	41515.3	48361.7	51894.3	34348.9	32293.4	36647.3	34463.8	41059.1	42121	42637.3	58297	43349.1	49978.5
BML-LCMS18-10.05-708.2580		35691.1	31071.1	35772.5	33359.2	28340.4	81329.7	192494	118712	98042.9	200369	113558	171997	158095	107583	98051.4	35733	73961.6	68282.2	56689.9	101314	35843.4	34111.9	37258.8	36655.7	32686.6
BML-LCMS18-29.75-598.3875		35683.4	30833.7	25192.5	7408.1	30652.1	0	0	0	0	0	266263	158377	25244.4	53115.7	38407.6	0	0	0	0	0	0	0	0	0	0
BML-LCMS18-24.1-693.3911		35629.2	34055.7	35714.3	29400.2	31229.2	0	0	0	0	0	71034.1	86098.4	64171.7	59678.5	47034	0	0	0	0	0	18982.7	18367.3	20456.3	16489.5	14538.6
BML-LCMS18-14.39-374.0856		35553.1	39849.8	33186.6	34031.8	35149.7	44501.8	5487.56	8761.17	8737.89	3991.64	0	0	0	0	0	651989	565074	746755	790838	945913	38758.8	35920.2	36279.2	41591.9	41259.2
BML-LCMS18-32.82-384.2852		35234.8	17984	15021.6	10188.3	9787.24	44100.9	86277.1	103214	134899	64867.7	0	0	0	0	0	0	0	0	0	0	124660	106335	101624	86849	94335.7
BML-LCMS18-10.43-136.0539		35153.8	23470.9	31595.4	0	23181.3	118978	108419	147435	182734	112071	86020.3	159950	144723	80404.6	73132.7	27992.4	31040.2	41604.2	31697.9	52715.9	46629.7	50119.9	55073.8	63889.4	58515.9
BML-LCMS18-3.1-691.2237		35066.7	34354.7	41881.9	39544.5	33651.5	42383.4	67997.8	64239.8	60020.2	57828.1	472649	318628	287112	26759.1	15923.9	0	0	0	0	0	0	0	0	0	0
BML-LCMS18-16.48-480.1955		34855.1	30283.2	28659.5	28724.6	26669.2	0	0	0	0	0	37533.3	128012	169374	153464	109439	8600.64	20115.6	18467	11755	31100.2	110761	135046	127830	122281	132582
BML-LCMS18-31.06-344.2902		34218	45811.9	72554	73146.5	71119.4	132368	117765	131173	60279.5	87331.7	750198	1.36666e+06	384232	251377	277362	121432	456394	264379	252530	375168	66222.8	69265.6	89341.5	75661.4	81251.6
BML-LCMS18-29.68-609.3554		34068.7	32485	33982.9	30799.8	19842.4	10012.3	9023.24	15172.2	8833.47	9298.37	204520	169513	119430	94432.5	87186.6	0	0	0	0	0	0	0	0	0	0
BML-LCMS18-14.34-244.1347		33912.7	28199.5	31368.6	41445.1	27658.3	33188.8	25289.2	26674.8	28827.8	19393.5	48166.5	50384	45562.8	1.12184e+06	1.55068e+06	32949.6	50699.9	61672.1	47556.9	56395.5	49411.4	45165.2	64784.7	41465.2	44411.1
BML-LCMS18-13.16-228.1345		33816	20338	25017.2	39124.2	17089.6	0	0	0	0	0	0	0	0	0	0	191023	78140.5	47915.4	168701	129239	116666	113989	100804	129814	139469
BML-LCMS18-11.99-660.1662		33758	28338.2	23173.4	24725.5	20153.1	12104.7	0	15478.3	20702.1	10085	183017	123791	79181	31879.8	23650.2	12577.6	32810.9	28331.5	23263.6	39966.8	62747.9	60049.4	58002.7	54688.2	53250.4
BML-LCMS18-31.68-868.9645		33680	32695.2	33519.8	46409.5	47794.2	0	0	0	0	0	0	0	0	0	0	24123.3	24256.6	12426.4	34162.7	33361.5	59864.9	49542.9	61812.1	58437.8	62079.3
BML-LCMS18-23.86-600.4962		33593.6	17147.1	17421.6	32617	19182	0	0	0	0	0	0	0	0	0	0	108130	64012.1	29920.7	122690	98611.5	214728	197311	188099	237906	222504
BML-LCMS18-11.48-489.2218		33453.7	32023.9	30409	30266	35841.2	17958.5	25043.8	20160.5	21527	28877.2	92740.1	138309	180470	169530	145764	18246.9	30855.5	38697.9	25936.7	36870.7	50248	54545.6	48218.1	42326.9	40112
BML-LCMS18-42.27-757.2137		32947.3	29310.9	16085.6	27106.6	16122.6	41810.3	408318	97888.7	67447.4	35960.5	20092.7	169332	115857	43672.1	19723.8	532323	1.25842e+06	1.09857e+06	1.12759e+06	1.42522e+06	28213	12525.1	21625.7	13186.8	15307.9
BML-LCMS18-25.74-604.3018		32863	31253	45269.1	66104.5	48161.1	14701.1	12754.1	10995.3	12926.5	16667.9	19430.9	31614.3	16405.4	12989.4	20738	58574.8	86235.3	79318.8	74835.5	74262.1	39062.6	27950.8	43708.7	29976.4	27969
BML-LCMS18-24.86-368.252		32540.3	46708	85919.7	42582.1	85810.5	42947.6	9966.29	14823.5	0	0	103237	578180	505838	211021	355594	115582	112064	121203	179251	209617	62633	47236.8	55556	46722.5	43346.3
BML-LCMS18-15.39-458.2136		32331.5	29145.7	25150.9	40426.4	24818.5	38374.6	60145.9	47394.2	69558.9	44216.1	65032.6	189952	274568	396282	423952	151171	170482	187850	171738	327217	117764	110953	104996	92834.9	92020.4
BML-LCMS18-13.10-608.2097		32281	29827	31040.7	29548.9	32008.7	47419.4	22498.3	61685.6	79773.9	35052.9	24930.4	19301.9	12426.4	5340.46	5228.82	0	0	0	0	0	23377.7	21985.8	23906.4	19076.2	19512.5
BML-LCMS18-25.13-346.2694		32263	29944.1	36735.8	22099.1	31441.2	64930.5	54786.4	34516.9	47041.4	43440.8	184474	1.43701e+06	2.01283e+06	1.1967e+06	709326	628491	337530	289186	581081	885010	78647.1	56557.8	47414.6	63471.8	44752
BML-LCMS18-24.85-352.2596		32205.1	25203.1	26957	29837.2	22210.6	0	0	0	0	0	31127.9	50635.5	60886.8	28488.3	23833.5	72634.4	136358	90712.6	104299	103448	28755.8	24614.6	27538.3	30984.8	26299.3
BML-LCMS18-32.06-375.334		32153.1	32416.8	34864	54805.6	46916.3	94191.2	94718.7	99136.6	113844	102293	53392.1	60349.1	65540.5	77976.3	71128.7	95723.7	85577.5	99006.2	86596.4	127912	100665	80000.5	92381.4	68307.3	80366.5
BML-LCMS18-24.36-574.2761		31990.8	26565	26959.9	42493.9	30270.1	18398.4	46099.4	22915.8	21305.3	26872.2	0	0	0	0	0	3.64673e+06	550113	334077	2.47069e+06	1.94242e+06	105357	116203	93915.3	139908	144025
BML-LCMS18-35.96-861.5569		31848.8	33777.5	34871.7	35478	38155.3	1318.27	2626.6	3257.75	2605.08	3593.35	24115.8	43153.2	89691.5	142315	144860	0	0	0	0	0	19610.2	14946.4	22488.9	16915.4	16641.2
BML-LCMS18-25.44-234.1249		31740.2	32719.8	41771.3	39413.8	32685.2	0	0	0	0	0	128062	155806	105139	187961	220784	42876.8	20071.4	27667.4	46483.5	41677.9	35433.5	27306	42911.9	34749	34316.3
BML-LCMS18-32.23-382.3576		31735.3	31022.8	38186.9	34525	42290.1	23871.2	25919.3	21266.4	26343.6	21435.7	3364.85	12884.9	16781.8	15775.9	21267.9	61685.3	74207.8	77516.4	75363.5	77024.1	35056.9	35001.2	37408	29262.4	31245
BML-LCMS18-30.27-322.1849		31649.4	36588.4	39047.9	34012	39699	7253.36	11012.7	21242.8	10563.8	16824	36463.1	45331.8	28261.3	13560.4	4785.59	8363.59	5975.19	7900.59	4449.53	8408.49	25851.7	17447.9	19593	15991.7	22579.5
BML-LCMS18-31.15-664.3203		31623.8	35343	33484.4	34118.4	32042.5	0	0	0	0	0	0	0	0	0	0	35305.4	49511.5	44021	47278.8	53362.9	34803.5	29374.9	35330.2	32492.9	32945.3
BML-LCMS18-34.59-768.4766		31598.4	32802.2	34572.2	141423	55891.1	0	0	0	0	0	111294	175797	206368	146591	78239.2	29569	121731	118655	85217.7	153552	71480.1	140099	76851.3	57000.1	55059.8
BML-LCMS18-30.56-633.3835		31285.7	39500.8	47445.3	37966	45069.1	11484.4	16542.2	21460.1	13483.2	13349.3	1.0475e+06	737620	538490	1.06893e+06	1.66861e+06	6525.07	10765.1	17267.1	7434.97	7270.67	11241.2	9127.73	13884.3	9058.63	10048
BML-LCMS18-30.88-444.2834		30810	18507.3	20677.9	23119.8	19090.4	14530.4	13143.2	13216.9	19874.4	9632.43	279857	168630	94862.4	87036.8	65616.8	14550.7	41685.5	34031.7	34208.4	36847.9	23033	25489.2	33596.8	32210.1	27172.9
BML-LCMS18-27.6-564.3265		30501.4	42842.3	32993.8	38188.7	34570.9	0	0	0	0	0	23875.8	25097.1	29133.5	44123.7	46908.2	349596	124474	77612.2	313173	246343	45788.4	45385.5	70279.9	46319.8	52477.3
BML-LCMS18-32.43-590.2623		30089.3	40790	55911.2	57882.1	45479.9	0	0	0	0	0	191374	201118	189821	133665	107365	0	0	0	0	0	28557.9	24447.7	30041.5	23196.5	22347.6
BML-LCMS18-14.32-506.1964		29743.7	32094.8	29163.3	29233.2	28417.9	0	0	0	0	0	827.494	5187.94	16132.9	9773.35	9417.02	25520.7	48837.6	60720.8	31652.1	46047.1	71220.4	77002.9	72070.4	65163	65856.2
BML-LCMS18-26.53-508.2464		29497.8	23793.2	42169.7	32362.2	26020.5	37658.3	61608.1	54260	52344.6	65717.3	0	0	0	0	0	48977	27909.2	5450.41	59740	34745.7	26202.5	21098.6	26427.2	21806.8	24225.5
BML-LCMS18-24.86-328.2612		29426.5	44071.2	77499.9	40924.9	80973.8	33027.8	11606.9	12488.3	6053.64	6623	85543.4	541425	490443	175410	305192	113313	121521	112825	200471	225078	52414.2	42855.5	53960.4	43939	41807.9
BML-LCMS18-30.81-532.3442		29343	27893.2	27999.9	25743.6	31157.7	0	0	0	0	0	0	0	0	0	0	14042.5	17071.9	16006.1	18221.6	17456.6	17598.8	17240.9	20869.6	19396.1	20152.8
BML-LCMS18-12.54-491.2358		29182.2	25108.5	22306	26576.5	21847.9	0	0	0	0	0	120652	238392	336487	254769	180391	0	0	0	0	0	51691.1	53626.5	53647.6	42229.9	43122.3
BML-LCMS18-26.57-516.3219		29012.3	27330.7	18502.8	23633.6	28057.5	20652.8	30329.5	21247.4	22206.3	28016.8	165331	185910	232293	501616	552420	39104.2	53098.3	42425.7	33770.3	45296.9	34105.9	25102.1	9577.49	18946.9	9818.79
BML-LCMS18-26.18-614.2295		28868.5	17556.2	23390.7	32037.6	19268	0	0	0	0	0	0	0	0	0	0	21950	59442.4	38729.8	70900.5	62473.2	72533.1	85070.8	105397	100162	104862
BML-LCMS18-31.59-596.3658		28851.8	22824.3	18565.5	18887	19943.3	0	0	0	0	0	109918	137905	148425	133928	73125	20954.3	28307.5	23445.1	28329.5	29374.6	26726.9	31393.6	31024.3	29342.8	30668.5
BML-LCMS18-37.17-820.5544		28827	41082.3	40448.5	47116.3	77301.7	106803	76438.1	98924.3	30519	60670.8	220057	465637	144298	131680	176083	49565.4	64385.1	110481	79062.6	144529	53502	42843.4	58574.4	50114.6	62749
BML-LCMS18-12.85-190.0639		28664.7	20727	23539.7	21405	18314.6	36851.7	52360.2	43054.2	48075.6	52878.5	19587.9	35699	28090	26403.3	42691.1	14602.1	32862.4	42464.9	20556.6	24454.7	49906.3	67899.7	44576.9	48693.9	46837.6
BML-LCMS18-30.58-616.3631		28652.7	40450.3	50617.4	41241.8	41888	17035.5	18124.2	20611.7	14931.9	12305.8	806080	607901	488496	896705	1.34172e+06	0	0	0	0	0	22225.3	19253.1	20432.7	12628.4	17479.9
BML-LCMS18-24.14-558.3026		28522.6	48924.6	58090.7	64445.3	67476.4	15670.7	10885	15682.2	8018.9	6999.24	24062.8	59451.1	56714	65010.3	68029.3	76401.1	107695	102331	119053	147759	124642	95790.8	106440	87405.6	93108.8
BML-LCMS18-25.48-556.2954		28433.9	29086	30470.9	29338.6	26713.8	7554.33	5586.74	8127.73	6893.79	4824.48	102283	124142	88827.8	132417	170129	10737.4	25389.9	32228.8	13112.3	23362.6	41934.5	34527.2	36753.7	30493.3	33172.8
BML-LCMS18-13.09-590.2008		28420.8	29300.5	23268.6	25117.2	27613	40025.5	19851.6	48857.8	63452.9	26425.7	23602.3	22477.5	14269.3	13834.2	11761.1	0	0	0	0	0	20741.6	17585.4	21283.9	15291.1	14710.9
BML-LCMS18-15.02-394.1959		28301.3	24782.4	21185.6	25849.8	22695.4	4342.49	7202.27	5023.91	4687.75	5333.01	29106	88640.8	117800	127232	81246.4	4127.78	13876.1	17763.5	10074.7	20321.3	55774	71055.4	67811.1	62592.3	73232.1
BML-LCMS18-20.5-332.1302		28032.5	20713.5	23795.3	34617.5	18294.5	0	0	0	0	0	0	0	0	0	0	58069.8	45240.5	20007.1	60326.9	53189.4	89144.6	76793.4	74717.1	79784.8	85604.3
BML-LCMS18-31.87-617.4212		27565.4	31956.4	45932.3	22063.8	34567.7	2452.57	2439.76	1474.09	636.502	951.365	22640.6	71099.9	65445.2	63867.5	57023.4	17935	14566.1	10312.7	24902.3	19196	24274.4	40122.6	63274.6	43432.3	28428.9
BML-LCMS18-30.71-528.2458		27434.8	21195.2	20643.9	25932	25349.3	0	0	0	0	0	0	0	0	0	0	50575	42832.6	35274.3	53597.5	52030.1	49600.3	40160.1	40537.8	36218.5	43762.2
BML-LCMS18-31.39-290.2598		27150.2	30262.6	30115.6	26733.5	28776.5	27489.9	23413.6	16760.9	20485.5	20221.2	270652	577326	2.25267e+06	2.31968e+06	754291	65885.2	67908.9	45067.2	50613.1	78576.5	32953.9	38466.9	42574	31373.3	32843.2
BML-LCMS18-14.28-260.0927		27088.4	21769.8	20312.5	19851.1	23591.7	5962.17	6823.93	7108.28	7269.2	5384.8	39581.8	52923.8	38794.2	51691.3	66964.3	29360.5	43162.5	38364.5	34209.9	42850.8	20422.4	16114.8	24127.3	14153	13254.6
BML-LCMS18-27.1-330.2743		27065.2	38016.5	40919.5	62470.3	41192.4	0	0	0	0	0	99327.7	125306	76201.6	77315.1	132593	88669.7	88492.9	125631	102377	117172	0	0	0	0	0
BML-LCMS18-8.04-458.1453		26958.8	22231.8	24865.2	22511.3	24110.2	30704.1	45872.9	34807.4	29312.9	31181.9	91550.2	157667	180603	193944	119839	0	16862.7	0	0	23413	59193.1	55261.6	52199.5	46745.4	42295.7
BML-LCMS18-25.96-240.0792		26954.8	21119.8	19438.8	37165.1	27943.3	0	0	0	0	0	0	0	0	0	0	25269.9	76011.2	51434.5	52894.8	46734.5	148523	131866	151229	159325	170971
BML-LCMS18-18.16-486.2088		26907	26405.6	25379.6	21227.9	25325.2	13824.6	24373.9	19111.5	19229.9	19310.9	40080.4	54160.4	71246.2	59493.5	62182.4	3638.17	12420	9505.35	9202.87	15937.6	34801.4	31887.7	29113.5	28777.4	29303.6
BML-LCMS18-30.9-440.253		26848	27971.4	31709.5	30032	27918.3	0	0	0	0	0	0	0	0	0	0	214632	143791	99948.8	212830	188437	64616.5	64065.8	62952.4	69708.1	73427.1
BML-LCMS18-14.91-438.191		26818.6	19737.8	16995.1	20460.1	16209.5	0	0	0	0	0	45568.4	178418	263099	393175	321067	0	0	0	0	0	64287	73839.4	74514.8	66829.7	73743.3
BML-LCMS18-6.57-529.1731		26775.6	57197	43148.2	49288	64543.2	27166	50103.4	41933.6	22928.4	24192.8	727834	491935	480780	53923.3	13233.8	0	0	0	0	0	0	0	0	0	0
BML-LCMS18-26.18-583.492		26247.7	16703.1	20694.8	33556.9	20449.1	0	0	0	0	0	0	0	0	0	0	26080.6	59214.9	31061.6	76318.3	63826.9	86774.5	79981.3	72852	85569.5	91559.7
BML-LCMS18-23.67-228.1344		25952.2	18255.2	23155.1	30193.8	17652.2	0	0	0	0	0	0	0	0	0	0	16213.2	23843.5	15421.8	28555.4	26290	82667.3	79076.5	81728.6	87775.6	84785.5
BML-LCMS18-10.09-555.2319		25878.9	23137.2	32298.8	32675.7	22109	60412.1	59904.2	103723	94591.9	55584.5	235003	449859	298467	107399	89730.9	14285.8	42011.6	35533.8	17823	38423.8	57850.3	49641.2	71051.1	72714.7	68347.6
BML-LCMS18-23.04-408.2449		25841.2	15659.3	19974.6	31564.5	15908.8	0	0	0	0	0	0	0	0	20848.2	24157.9	106220	85900.9	90569.4	126686	102284	112608	105825	93355.8	119891	137052
BML-LCMS18-25.53-671.4052		25749.3	24838.9	33367.7	21101.2	16231.4	85014.9	196277	121636	67593.4	141715	470600	239417	388080	532062	594657	55130.2	319150	257401	80875.6	41386	39950.4	17159.5	16756	22810.5	21186
BML-LCMS18-29.61-403.2009		25528.7	25465.9	28523.5	22997.1	29151.9	104404	138607	183626	124034	179926	61756.5	124938	62680.9	32082.2	12160.1	0	0	0	0	0	19653	16055.1	19784	25212.1	24054.5
BML-LCMS18-29.63-400.2749		25497.3	33877.3	44594.9	37488	36807.2	0	0	0	0	0	81228.3	70806.6	72152	118677	112449	33489.5	33849.8	61271	24450.4	21709.5	0	0	0	0	0
BML-LCMS18-11.95-562.1900		25493.1	23933.8	26797.3	25234	25967	60271.2	72399.8	73937.7	77996.3	70035.3	66104.8	90488.7	71675.4	34390.5	29631.1	19215	30642.4	23457.2	20112.6	42043.4	23232.4	25744.2	27042.9	27145.6	24980.1
BML-LCMS18-38.4-424.4366		25449.1	56591.8	77750.9	100977	127578	16664.4	15132.4	16179.6	11196.3	28754.4	5820.7	41846.3	30924.3	19502.8	24633.8	19800.8	48233.9	49870.4	61699.1	82637.5	33870.2	33438.1	43380.7	27468.4	28240.9
BML-LCMS18-22.77-386.2616		25426.5	23403.7	25722.1	35510.1	22336.4	0	0	0	0	0	0	0	0	0	0	49751.3	58527.5	63202.8	76826.2	63440.4	141434	145427	126764	173797	159690
BML-LCMS18-10.44-132.0593		25409.5	39168.9	50262.9	39684.9	39013.8	43069.7	75567.4	77764.9	57984.6	50511.7	281627	333815	466040	56299.4	0	1553.46	5123.16	5093.9	10566.8	8269.79	9268.82	10482.6	14933.9	9445.65	13551
BML-LCMS18-23.86-292.1338		25343.5	12363.3	16630.3	31595.7	11526.6	0	0	0	0	0	0	0	0	0	0	50553.1	18833.7	8711.64	44587.1	37949.6	79166.3	75170.5	81200.6	96812.3	104320
BML-LCMS18-30.77-734.3457		25283.9	23022.3	19874.7	22678.1	20730.8	0	0	0	0	0	385333	255082	124123	88808.1	256482	44236.2	79640.5	69966.2	69154.5	91093.2	40931.8	43024.8	58828.4	50380.6	62552.8
BML-LCMS18-11.44-284.1260		24711	56832.9	47466.9	147243	57110.2	0	0	0	0	0	0	0	0	0	0	127512	44769.2	56655.1	131234	102925	109027	100786	53119	65588.8	84017.8
BML-LCMS18-15.03-412.2056		24497.3	28993.2	23609.1	29858	26429.4	5000.96	7164.33	5467.55	5623.82	5771.07	29311.1	113940	145915	135144	87582.4	21791.2	13101.7	18522.5	17436.8	25582.6	56480.1	72464.8	76648.5	73156.8	70640.2
BML-LCMS18-23.68-332.1667		23693.7	20232.8	20819	22953.8	14451.3	0	0	0	0	0	0	0	0	0	0	36047	37838.1	8276.08	33898.1	48556.9	52134.5	55304.8	65259.4	66656.4	80209.4
BML-LCMS18-13.12-721.2562		23670.2	34671.4	32324.3	32132.5	24802	34183.7	48587	47119.4	38980.8	55763.4	57990.5	112756	103047	115164	121414	18502.6	27215.3	26799.5	24314.4	42569.1	55607.4	72676.9	56387.9	53886.3	68004.8
BML-LCMS18-32.4-476.3072		23664.9	14015.7	16848.6	31540.9	27314.3	0	0	0	0	0	0	0	0	0	0	216194	117967	106997	219275	226597	83453.6	59291.8	75672	65183.1	70801.5
BML-LCMS18-36.62-462.3684		23618.2	19353.5	24255.8	31181.6	43405.6	0	0	0	0	0	12466.3	58586.2	35136.4	43325.1	167354	270075	243951	306217	391894	492133	58289.9	80559	97700.6	66342.9	85795.1
BML-LCMS18-33.93-386.3382		23203	21983.1	25703.1	49166.2	47075.9	109076	114833	110976	112527	103575	21618.7	33976.6	50751.3	56084.8	50437.8	76917.9	75324.2	99601.5	93568.9	141518	96218.7	65539	89105	64723.8	77079
BML-LCMS18-14.29-190.0654		23108.7	31166.9	32040.1	34370.4	41507.9	40135.3	34805.6	25594.9	15573.3	18680.4	347173	201270	131635	25961	19352.4	70405.3	34820.5	13151.7	91627.9	86834.1	0	0	0	0	0
BML-LCMS18-14.32-589.1923		23077.3	17597.7	16541.3	16067.5	12281.4	0	0	0	0	0	53704.3	61706.6	31224.3	22114.9	10990.5	683508	660560	861967	875317	1.03608e+06	3417.42	4372.37	4051.24	4115.72	3600.85
BML-LCMS18-9.33-192.1493		22860.1	16968.3	17437.1	17306	17304.2	0	0	0	0	0	65659.5	179296	237741	273105	196720	0	0	0	0	0	28182.8	27919.9	27343.9	23166.7	23659.2
BML-LCMS18-15.22-438.1934		22828.1	19583.2	15279.1	20440	14727.1	0	0	0	0	0	27816.4	68460.5	91802.6	121413	94135.2	0	0	0	0	0	46949	58602.4	57349.5	47275.5	45172.5
BML-LCMS18-9.85-739.2668		22708.3	17780.9	21292.8	21934.6	14903	44897.3	78144.5	61856.8	62122.9	93634.4	32860.7	92396.2	138929	210801	266070	12840.1	14094.4	15575.1	15543.5	23975	53619.6	42843.7	48259.9	47987.3	40864.3
BML-LCMS18-30.75-420.2841		22601	18801.3	16312.2	37901.7	20118.1	0	0	0	0	0	0	0	0	0	0	93015.3	30440	32268.9	83952.4	72157.8	146844	140196	149062	142103	155551
BML-LCMS18-25.13-328.2609		22492.5	20312.5	26243.2	16031.2	23604	28028.6	26286	15026.1	19916.4	21355.4	109488	1.02972e+06	1.62838e+06	826716	436617	513167	245542	190440	499821	740460	46724.7	34424.6	30131.4	38387.2	31051.6
BML-LCMS18-25.97-600.5856		22428.9	13847.9	18991.1	26878.2	17617.8	0	0	0	0	0	0	0	0	0	0	41645.8	106975	55809.4	77900.7	73828.2	144581	127393	141588	136325	159786
BML-LCMS18-37.72-771.5839		22356.5	29243.9	45683.3	54728.4	81692.8	22264.6	35260.6	28995.6	34011.4	33986.3	26898.6	76125.9	90781.3	123656	124871	34745.3	109275	131273	114484	137854	53276	41635.4	54547.5	43361.5	45505.3
BML-LCMS18-24.14-540.3035		22303.6	43927.5	51794.8	57077.3	63731.4	12562.3	7160.64	13506.2	5733.66	4847.43	18871.1	59919.3	54729.6	62326.5	67714.9	49238.3	92506.9	88085.1	87012.2	121251	99615.6	77328.7	87713.4	70000.6	76299.7
BML-LCMS18-29.59-314.1778		22286.9	27108.3	34574	29237.1	30735.4	181080	212566	255717	201852	252995	114981	192065	115465	28835.7	53530.7	10726	10797.1	17962.7	0	8909.45	32588.3	19320	0	0	0
BML-LCMS18-22.76-310.2125		21947.7	15964.1	21162.4	26392.5	25594.7	28546.4	26665.4	31004.2	25118.6	22925.3	51119.6	37551	80469.2	174007	397228	237393	410974	544304	371261	495776	57604.7	43989	44840.5	40048.8	45204.3
BML-LCMS18-15.57-341.2499		21791.9	6536.19	530.282	441.676	207.362	125.704	208.989	623.32	25876.8	1053.88	30421.6	4709.76	1041.77	744.301	779.923	19556	100.617	19706	2003.55	655.432	3834.82	845.406	101.447	306.717	321.051
BML-LCMS18-30.09-400.2782		21730.7	32155.8	45148.8	37330.8	44990	0	0	0	0	0	1.03982e+06	759416	645619	1.21467e+06	1.35747e+06	12943.8	18209.1	28117.8	16370.9	18479.2	0	0	0	0	0
BML-LCMS18-15.42-282.1439		21697.8	22705.6	22761	30072	19302.5	15087.2	24599.2	12774.1	17124.1	11990.4	20436.6	30756.8	42327.5	166157	328318	35380.2	43370.2	49220.9	33663.6	34576.3	125552	116024	146358	111677	95167.3
BML-LCMS18-34.59-763.5192		21694	23658.8	23741.2	97313.1	38121.8	0	0	0	0	0	74386.2	113944	132253	106541	51239.6	21452.2	78307.3	76131	55720.1	103497	48405.5	96742.6	48416.7	38045.5	38958
BML-LCMS18-25.09-526.2611		21650.7	17073.5	18532.7	22090.8	13064.6	0	0	0	0	0	18969.1	151486	10189.8	13911.8	110105	362157	240897	157235	409035	494847	31140.9	24946.8	23817.6	29579.2	33703.4
BML-LCMS18-2.8-370.1277		21481.6	18515.1	22670.7	18198.8	16548.1	40666.8	121392	77674.4	97963.3	152737	138564	111587	96163.4	132496	215947	28046.2	54381.7	60903.6	47127.5	172671	192006	236833	164794	222044	252618
BML-LCMS18-5.51-428.2017		21416.6	18063.4	20041.4	22077.7	19066.3	0	0	0	0	0	30851.1	322275	569498	1.04339e+06	837419	0	0	0	0	0	37551.1	42121.2	42396.1	38381	40120.9
BML-LCMS18-16.45-475.2409		21220.5	16512.3	13489.5	17279.3	12553.3	0	0	0	0	0	36543.5	109370	156245	149845	100461	0	0	0	0	0	50642.9	60694.9	55345	51950.6	53792.3
BML-LCMS18-31.3-728.3582		21154.6	23993.7	30090.2	31193.2	29814.3	269973	190868	260299	143218	179120	946498	1.56313e+06	584278	651411	908897	33237.4	86202	100267	90096.7	132191	67216	61801.5	80108.1	79080.4	75190.3
BML-LCMS18-14.79-434.1198		20764.3	15855.8	13066.6	18378.2	14401.8	9999.52	18573.1	15148.6	28030.5	12980.5	11881.9	30161.8	27745.1	18673.1	17003.7	3378.85	16061.6	17343.2	8171.69	19354.6	89873	103555	102593	96129	90165.8
BML-LCMS18-9.66-445.1581		20686.5	12192.4	9072.76	15842.3	7806.16	15723.2	18141.4	25012.6	62723	26170.3	53522.5	69788	23693.2	9134.55	5155.56	13332.4	48974.8	48419.4	22745.7	54440.1	257362	258516	305068	232745	196362
BML-LCMS18-15.05-587.167		20487.3	24135.7	18826.9	18378.2	13948.5	0	0	0	0	0	0	0	0	0	0	94675.3	179190	226228	137788	178381	50908	46014.1	53547.3	52605.9	46742
BML-LCMS18-23.03-558.2823		20433.2	23507.1	14637.8	19730.6	11204.1	0	0	0	0	0	0	0	0	0	0	217896	57972.2	38280	184499	143926	50446.2	48475.1	46877.8	67247.7	67199.2
BML-LCMS18-12.58-728.2272		20186.4	19470.4	21803.3	19041.5	18208.7	38129.8	64028.6	44389.6	43233.4	68563.6	46434.1	79393.2	88703.2	99673.6	139974	23927.7	36752	45975.8	41542.7	68349	46590	52783.8	52792.8	53821.1	46930.3
BML-LCMS18-13.77-625.2356		20100.3	16508.3	14602.2	16312.7	11948.9	8493.17	6821.07	13161.8	15896.3	8285.5	180376	101147	35191.8	16168.7	10140.7	6116.63	18568.7	16419.8	8323.75	13720.6	24358.8	24583.3	30310.9	25869	25295.8
BML-LCMS18-24.43-526.2559		19751.6	12266.1	19645.4	22772.3	17670.6	0	0	0	0	0	0	0	0	0	0	101256	150027	72086.3	148999	173739	50037.9	38414.3	38717.6	42051.4	45805.8
BML-LCMS18-28.69-190.0654		19536.8	24280.3	37335.5	32960.8	36765.1	0	0	0	0	0	110369	73477.3	63504.5	114493	113937	0	0	0	0	0	0	0	0	0	0
BML-LCMS18-14.65-480.1993		19370.2	16063.2	13239.3	16279.2	16451	0	0	0	0	0	60283.3	163968	215948	177087	132348	0	0	0	0	0	32220.8	37887.3	32106.7	33238.1	53698.1
BML-LCMS18-30.66-613.3902		19088.4	23101.1	25131.7	18842.5	20851.3	14865.2	15153.1	15153.1	7415.53	13700.6	68210	86641.2	57381.1	53932.5	75385.1	7196.72	10262.8	9579.18	8371.63	9145.87	7507.48	10421.4	15410.1	9208.75	10217.1
BML-LCMS18-15.9-518.109		19047	14998	10524.3	14432.4	11526.6	0	0	0	0	0	9483	14439.2	15757.9	6342.7	8932.24	22095.3	35431.5	31158	28459.6	48278.9	81301.2	78394.4	84928.9	86343.1	92262.1
BML-LCMS18-10.55-246.0876		19039.2	24890.1	33643.9	23476.1	21760.4	21689.3	38056.6	32187.9	20106.9	23791.5	151019	148971	183438	24621.7	0	0	0	0	0	0	0	0	0	0	0
BML-LCMS18-24.37-380.1985		18982.3	43882	275240	105461	321512	1.8373e+06	2.28573e+06	1.10659e+06	2.02187e+06	1.41451e+06	1.69512e+06	7.621e+06	3.17921e+06	1.29342e+06	4.02953e+06	6.26859e+06	7.30505e+06	4.88902e+06	6.61388e+06	8.6222e+06	163006	54611.2	408361	118709	58510.1
BML-LCMS18-24.41-332.1637		18708.8	18965.4	26160.8	29041	18340.6	0	0	0	0	0	5855.68	6059.76	6224.59	6215.08	5613.35	108779	48432.5	47830.4	95195.2	80278.7	232925	221935	194392	204373	255673
BML-LCMS18-28.67-732.3716		18558.7	24569.4	29879.2	21002.1	23746.5	0	0	0	0	0	243514	197968	181560	282764	251350	0	0	0	0	0	9401.26	7709.4	10296.8	8613.4	8182.38
BML-LCMS18-28.97-478.3248		18512	15081.8	19165.6	16918.6	20346	0	0	0	0	0	0	0	0	0	0	114026	100144	83544.9	128905	116818	29891.7	24391.8	27396.6	22430.3	22455.9
BML-LCMS18-32.69-270.2524		18242.4	32347.4	19862	12173.3	28334.3	19478.6	7070.41	13261.4	1953.71	17371.7	1283.76	18709.2	5692.23	18562.8	11269.8	0	0	0	0	0	2768.98	3051.08	2263.95	308.493	1271.2
BML-LCMS18-23.68-292.1323		18205.4	14121.2	19610.1	22569.3	13992.8	0	0	0	0	0	0	0	0	0	0	5391.91	8815.2	2040.49	14690.7	12429.5	57583.9	54675.1	58017.6	61995.1	70295.6
BML-LCMS18-30.68-324.1983		18201.4	18427.3	21307.3	19747.5	19759.3	16837	19348.2	21134.5	12342	19726.5	45451.4	63077	50020.5	47441.7	67058.2	0	0	0	0	0	15389.4	12759.1	13920.5	12554.6	12229.5
BML-LCMS18-28.11-296.2322		18199.4	11698.4	35294.7	24461.3	20167.1	19824.3	18896.2	13191.3	14986.3	9446.79	20609.2	52831.7	31015.6	30035.7	52661.2	310374	229728	304386	319693	411138	33381.8	29751.8	30142.8	25250	27399.8
BML-LCMS18-27.12-294.2175		17925	31192.1	47811.4	38215.2	27204	67616.4	181607	86383	35143.3	96066.7	79252.4	73003.4	123407	203637	425942	369384	557031	606469	524498	611844	309684	229742	366709	262886	249459
BML-LCMS18-29.69-712.386		17773.1	20079.2	24136.2	19974.1	23543.7	40398.7	33017	40049.8	32692	34173.7	357924	235604	123537	159352	200936	17923.5	26856.3	41436.1	24260.2	33469.3	0	0	0	0	0
BML-LCMS18-12.92-680.2653		17612.3	17480	16276.7	16303.9	17138.6	6084.69	13908.7	7850.53	11797.8	15014.7	29124.5	97084.9	134332	246040	338353	17342.9	20947.4	26890.4	19184.5	33422.7	24771.9	28344	24016.8	26593.8	26251.8
BML-LCMS18-13.12-524.1701		17376.9	16400.6	17402	15675.2	16875.7	17677.8	28485.4	22798.1	21578.5	28379.2	26331.6	49494.8	47939.4	58650.2	61220.6	6666.61	8951.44	11125.2	10133.7	13318.6	24846.1	26290.5	28184.5	24522.3	24289.5
BML-LCMS18-20.71-726.1543		17344.8	14387.8	17069.1	20818.4	16404.6	0	0	0	0	0	2324.6	6337.9	5954.54	7777.77	7871.11	74352.5	100426	111757	79951.1	104140	49813.6	44248.8	47379.5	37745.6	37392.4
BML-LCMS18-28.76-388.254		17276.2	16356.5	17452.3	10981.8	17515.4	34365.2	66508	42985.4	30781	47602.8	0	0	0	0	0	0	0	0	0	0	44430.1	8684.87	9732.59	9944.54	10725.5
BML-LCMS18-12.73-546.2057		17086.7	15329.1	18260	18705.1	13463.9	151956	124663	180146	232327	123987	10775.9	15584.8	14592.9	12462.3	13209	3170.28	7236.4	7982.93	5876.14	5322.63	37289.4	31284.4	34380.9	32695.2	30256.1
BML-LCMS18-23.6-574.2788		16903.7	14106.3	17043.5	23252.8	14740.1	0	0	0	0	0	0	0	0	0	0	112593	74602.1	52904.2	118409	95518.5	93232.7	85990	82359	97048.5	110578
BML-LCMS18-24.65-510.2788		16782.4	17329.6	15975.9	12093.2	15444.9	0	0	0	0	0	31182.2	84496.9	51768.4	65285.8	64395	15340.7	17564.2	20053.7	14631	22012.6	7871.25	8456.99	9886.89	7951.07	0
BML-LCMS18-10.84-387.1550		16686.3	13856.3	15255.4	14974.8	15290.9	6380.82	10232.4	6904.15	7046.41	10555	16497.6	59275.6	90625.8	144918	134603	8479.33	9357.27	12057.6	8435.51	15541.4	41238.5	48171	43382.7	37880.4	36338.4
BML-LCMS18-13.07-452.1753		16421.2	13068.2	11695	13391.9	10230.1	3507.32	8964.65	8311.47	4164.35	8869.26	54789.3	215629	253247	217281	128366	13433.8	19024.5	27429.2	26257.7	40904.6	22042	31329.3	22849.4	27008.3	29183.5
BML-LCMS18-30.72-480.2502		16173.6	17621	20567.6	19157.7	24616.2	0	0	0	0	0	12868.7	0	106387	64363.6	29065.8	230535	571685	693075	338039	353726	33581.6	30818.2	30082.5	27935.6	25513.2
BML-LCMS18-24.57-315.3124		16162.5	18981.1	21145.5	27804.9	59367.1	50957.5	254619	66031.6	53815.5	52131.7	14600.1	22637.9	30274.3	34071.2	33854.2	30369.9	24212.8	31798.1	29700.4	39499.9	38516	33287.9	46477.5	32393.6	43389.2
BML-LCMS18-28.67-582.317		16077.7	11578.1	13471.2	14321.2	9609.91	116019	122240	125175	165871	112028	572906	770553	585752	699915	563838	48353.9	76800.4	70097.1	78013.8	102517	44987.8	36482.7	48200.6	55811.3	41736.4
BML-LCMS18-42.27-759.213		15938.9	14079.1	9643.12	14036.6	10138.6	23055.7	211664	50481	35382.9	20069.5	10649.6	91335.3	61554.4	22280.8	11454.8	275464	646308	559500	578834	731184	14576.9	7284.05	10753.8	7482.5	9494.69
BML-LCMS18-29.45-424.2772		15893.7	22231.6	22846.4	17777.5	21686	0	0	0	0	0	401859	295626	276925	567294	748532	18492.1	23923.1	19319.9	19102	17232.2	13621.7	11210.5	13365.4	11184.2	9258.9
BML-LCMS18-30.6-304.2359		15801.6	15558.4	16297.3	15299.9	19693.1	20869.1	24515.6	23679.7	15078.5	25719	167768	158055	122538	153482	141438	4230.15	3403.53	3651.73	3336.07	2318.23	9531.37	9317.52	9922.76	7499.13	10268.5
BML-LCMS18-22.09-276.1729		15679.4	20718.9	20979.2	22710.5	29094.1	8838.45	8942.79	10213.2	9073.72	4020.17	59257.2	68160.3	50432.3	64943.4	82157.7	59389.4	70582.5	103384	97883	134704	14175.7	12451.2	22075.5	15157	11732.9
BML-LCMS18-13.79-474.2137		15593.3	10880.9	11787.4	12558	10607	8192.54	12736.7	10579.3	8847.63	7302.57	36618	100847	153231	182799	167716	18615	23126.2	19674.3	17792.3	34136.6	39793.4	36079.2	33798.6	39307.6	36291.8
BML-LCMS18-30.63-624.3038		15264.1	21337.5	22625.5	29014	24977.4	0	0	0	0	0	263401	172077	97338.2	71595.7	47589.4	0	0	0	0	0	20483.4	16861	23238.6	16258.2	18059
BML-LCMS18-24.18-706.3115		15130.2	16761.2	13026.5	12252	11474.8	51427.3	61550.7	30498.9	45738.7	55382.2	24630.8	28174.3	26667.9	25752.2	23623.7	157062	306700	166673	130478	165943	16714.1	10468.2	16663.6	10188.7	8585.96
BML-LCMS18-25.89-526.2925		15061.8	14428.9	11530	0	9668.19	0	0	0	0	0	15603.6	15193.2	11201.6	13070.1	13897.3	43933.8	20716.1	21920.4	30301.9	31691.2	13497	11996.7	12316.6	12609.7	7285.96
BML-LCMS18-31.4-326.2307		14923.3	14828.1	19688	16192.4	19739.5	158574	264759	260184	163440	271280	53721.5	83337.8	47733.1	38196.5	11845.5	0	0	0	0	0	15568.6	15006.5	11716.9	9425.49	13112.2
BML-LCMS18-20.49-650.2876		14889.5	30281.2	27384.6	30849.6	28053.5	15958.8	12087.7	13927.4	11650.4	7046	125575	110011	109733	78243.2	143154	52949	46387.2	63005.5	39794.8	47924.8	61816.7	36571.4	43247.5	26387.6	31480.1
BML-LCMS18-33.04-638.2751		14834.7	20168.5	25812.3	26910	25508.3	0	0	0	0	0	48630.3	145612	168865	54256.6	31256.6	0	0	0	0	0	6015.47	7143.44	8359.55	5385.21	4934.13
BML-LCMS18-37.41-820.5449		14825.5	13160.7	10229.2	21441.4	24106.7	59273.5	42425.8	43031.9	11692.6	23721.4	160041	422272	187664	175843	165441	35553.3	92853.1	71538	84225.4	137992	57274.5	50746.2	72356	58547.6	75543.2
BML-LCMS18-2.48-389.1673		14788.9	5948.4	0	0	0	44505.2	143748	78872.4	96640.4	158686	49297.8	75224.2	87093.8	152997	211990	60022.2	110378	123530	84085.3	266860	328286	385731	261471	365756	397230
BML-LCMS18-25.07-700.3634		14411.6	16049	18209.5	13774.9	15213.7	7211	7928.13	7118.48	9052.03	6231.18	40223.5	65057.2	56517.6	77273.2	103160	0	0	0	0	0	12362.7	8200.44	8469.08	9974.44	7677.85
BML-LCMS18-19.2-378.1845		14339.9	29099.6	93057.2	50811	130296	44509.7	103355	148094	208294	66906.5	754641	945063	199286	30164	17302.9	42221.2	67315.9	52419.2	49331.3	63863.7	83561.3	23104	94624.1	36721.9	28214.4
BML-LCMS18-41.8-884.5425		14310.3	24143.4	76283.9	136448	230124	233145	156269	105126	18438.3	63729.7	15776.7	201498	431061	526544	462599	6280.62	50094	42152	58234.7	90787.3	29862.9	30337.7	64491.2	56504.9	66432.6
BML-LCMS18-28.83-728.3567		14180.9	12554.1	14860.1	11281.8	11521.9	80966.6	79278.2	88223.6	98728.7	61106.9	243411	96811.5	43082.5	46769.5	46949.3	61290.1	133666	96708.9	75819.3	113668	16940.7	14384.1	15715.4	16181.4	16005.8
BML-LCMS18-15.00-724.27		14135.5	14948.6	16274	13466.6	13191.1	13155.4	24803.8	21291.5	18172.2	17129.5	85150.3	105082	97815.9	62691.3	73973.6	7323.66	14879.8	10611.9	8432	15926	19715.7	17140.9	17467.8	18757.8	18704.7
BML-LCMS18-16.79-754.3181		14021.1	14359.2	19993.1	16966	17930.5	80337	120477	100470	182908	94817.5	534467	1.44578e+06	1.37597e+06	433752	229339	118730	175851	112458	157908	255079	57532.7	51695.5	74235.2	99553.2	80548.9
BML-LCMS18-18.82-308.1597		14010.8	8955.73	14983.9	15849.8	0	0	0	0	0	0	0	0	0	0	0	54723.2	64854.6	49095.5	89770.9	92452	180236	187919	167428	180668	228694
BML-LCMS18-25.94-363.1956		13982.7	35318.2	119867	32406.9	116629	1.32929e+06	1.57488e+06	1.44107e+06	984061	1.17959e+06	415405	1.72757e+06	936393	390713	914795	3.59207e+06	4.63196e+06	2.97619e+06	3.74624e+06	5.23614e+06	34318.1	6236.67	47585.4	11710.9	6579.14
BML-LCMS18-10.25-196.1074		13755.7	14389.3	9109.86	8028.27	14088.5	0	0	0	0	0	47686.6	122364	184792	326938	605976	134781	240404	407516	229698	287165	0	0	0	0	0
BML-LCMS18-31.29-278.2201		13742.3	13166.3	20958.9	17111	18473.8	10207.2	10805.4	7396.26	4751.95	3640.54	31084.8	78729.8	61322.2	91577.1	98211.3	72469	82830.7	88720.9	91720.6	105566	35701.3	34196.6	35522.8	27099.8	26928.5
BML-LCMS18-26.44-278.2235		13493.1	13293.5	24697.1	20290.8	15655	34649.3	145923	42648.1	20901	74542.2	51957.6	33712.5	71256.6	120106	239021	215589	504336	569111	319807	387448	147897	110930	209066	126020	111535
BML-LCMS18-26.05-372.2828		13467.2	10370.3	12008	5870.07	8969.59	27286.3	15790.4	10157	18627.6	20627.2	75375.5	1.198e+06	1.49272e+06	865971	501908	248185	69152.4	87896.1	175087	308690	13280.9	9835.66	7579.63	11681.1	7417.31
BML-LCMS18-25.32-190.0653		13383.7	10550.9	9209.7	14581.2	10393.6	0	0	0	0	0	0	0	0	0	0	97366.1	97687.1	89865.8	88069.7	126120	70523.9	63132.1	74103	77897.1	72383.6
BML-LCMS18-22.77-292.1994		12957.5	14738.4	22467.9	15415.6	25771.7	10635.6	8384.31	11859.2	9812.45	12228.6	41885.6	26062.9	41357.1	96960.5	170889	190502	281494	330688	249928	344602	39488.3	35207.3	40312.9	37508.8	41809.4
BML-LCMS18-26.25-256.2394		12728.9	12923.7	10072	9861.19	11729.1	46879.6	34557.9	32110.4	29090.9	36285	111690	301507	374273	238460	183420	0	0	0	0	0	16639.8	19231.7	18134	19904.5	19190
BML-LCMS18-36.03-700.5195		12696.9	8355.85	8386.42	6612.5	5720.49	12907.9	6773.68	9710.36	7034.9	8281.85	372710	1.04057e+06	1.04746e+06	689119	599896	33154.5	30869.5	28519.6	48788.4	74684.5	30443.3	24760.9	29183.9	34713.2	34385.6
BML-LCMS18-14.58-572.1557		12569.6	8186.17	9898.28	8648.01	8395.79	0	0	0	0	0	18519.4	20889.6	6561.22	29186.6	25241.6	3.02738e+06	2.96648e+06	3.78004e+06	3.68306e+06	4.38796e+06	18854.6	18276.9	18263.2	20581.4	18765.1
BML-LCMS18-19.04-308.1273		12565.6	9747.49	11055.9	18701.3	7866.34	0	0	0	0	0	0	0	0	0	0	464665	99077.3	54370.5	360493	256967	87964.2	81386.9	59449.5	88987	98425.7
BML-LCMS18-22.08-334.1746		12465.2	18228.7	15633.7	12054.5	17594.8	0	0	0	0	0	45278.6	53291.7	37158.2	55580.4	59981.8	64748	72774.4	92472.4	101433	139435	7503.12	9191.21	7510.1	5449.28	5061.16
BML-LCMS18-30.75-608.2684		12432.9	28898.7	52151.1	46053.8	46015.8	0	0	0	0	0	210152	612690	1.08871e+06	1.57142e+06	1.37718e+06	279.312	11131.7	16377.6	1634.05	226.835	0	0	0	0	0
BML-LCMS18-19.04-308.1290		12412.8	8711.39	8093.59	9092.39	10698.1	27362.5	33437.5	22408.8	22104.3	28372.3	44139.3	215491	258659	255776	245901	86801.2	46758.8	24337.4	64852.1	97122.8	31319.2	25377.6	37224.6	34015.6	33135
BML-LCMS18-25.79-350.2428		12296.2	15464.2	35074.9	11450.2	21016.3	0	0	0	0	0	33574.9	284771	279566	111842	187568	6936.04	7954.18	10716.5	12451.5	12046.1	14624.2	12585.7	13785.5	12307.2	10580.3
BML-LCMS18-26.03-354.2741		12264.7	7872.74	8556.05	4234.79	7066.17	13332.2	7129.84	4542.92	7812.22	11918.4	39572.1	594963	889632	493103	235840	220349	84465.1	74212.7	188545	315147	17674.7	13756.7	12488.7	18195.3	10753.6
BML-LCMS18-14.55-650.2514		12222.3	9802.22	10067.9	10572.1	9962.89	2880.16	2841.84	3171.64	1083.03	1880.93	13206.2	25968.7	36370.4	102861	129086	7245.3	9700.47	10282.8	5609.02	14192.7	13390.6	9776.66	9719.32	11667.9	12576.6
BML-LCMS18-15.67-422.1949		12116.5	10228.6	7763.94	11645.1	8135.37	0	0	0	0	0	29752.9	56262.5	83354.9	124096	115992	6968.52	8102.43	10584.9	9327.62	15453.1	29815.4	34967.6	31809.8	28723.7	33860.9
BML-LCMS18-14.33-518.1832		11813.4	11320	12379.9	13782.6	11593.5	19794	9492.32	15344.7	10864.9	11626.8	23282.5	35472.9	114420	98380.6	96198	418413	448485	462413	460208	546354	25919.4	22282.1	31813.9	21408.4	21340.6
BML-LCMS18-25.79-544.3034		11569.4	15300.1	22150.4	13527.5	22237.9	11067	2819.41	2699.71	523.902	1330.29	27993.4	232837	220219	90350.6	141250	40082.1	34140.1	33377.2	69995.6	81739.9	15557.8	14602.2	17948.6	16373.3	14225.2
BML-LCMS18-21.92-380.1993		10984.7	9386.44	11787.2	9770.06	12410.4	34755.1	57766	51154.2	47129.8	49655	46121.9	86073.9	50733.5	37579.3	82353.4	236596	212530	159982	197876	307151	0	0	0	0	0
BML-LCMS18-14.94-382.1603		10903.9	11689.2	13355.2	12260.5	11891.2	0	0	0	0	0	15462.5	28635.7	34550	26864.4	23104.8	35056.3	33065.6	52739.1	42600.1	62034.1	49120.4	59692.8	55200.3	53088.6	56237.9
BML-LCMS18-21.51-296.1431		10857.2	25344.1	26185.2	7591.49	31206.8	313626	127103	117470	283613	73555.2	10227.7	147505	35048.4	9975.19	34059.3	311404	458390	422127	431604	504137	16348	0	43230.7	21326.5	9350.75
BML-LCMS18-21.74-326.1535		10807.3	18283.8	19015.1	11509.3	26448.9	214225	113960	29161	53925.8	155805	25665.4	173818	96339	88941.9	81898	374106	365520	216810	402907	447335	0	0	24663.3	0	0
BML-LCMS18-13.52-372.1396		10590.5	5700.6	7482.6	15396.1	4170.63	0	0	0	0	0	0	0	0	0	0	11275.8	19193.3	25400.1	18213.3	24982.3	100070	101882	85544	78550.3	79884.5
BML-LCMS18-14.58-554.1441		10533	6894.39	0	7825.06	0	0	10875.8	0	0	11698.3	16055.8	20676.8	0	31411.6	25828.3	3.03822e+06	2.70289e+06	3.63041e+06	3.6649e+06	4.48221e+06	15662.1	15628.4	17820	16278.2	15330.6
BML-LCMS18-17.31-180.1124		10488.9	15965.6	18291.5	13429.7	10261.2	0	19093.7	21426.7	18729	26153.8	110952	142366	92163.5	559255	774711	317100	408738	588772	667764	720934	18532.3	19524.2	22031.6	28772.9	29881.4
BML-LCMS18-28.13-318.2141		10389.5	7403.72	27920.8	17575.3	13083	14383.6	11866.9	7554.88	8214.03	3723.46	15481	38541.1	12048.3	22888.3	35941.2	205123	126734	171272	211472	256838	20591.4	18060.8	16257.9	14288	14926.7
BML-LCMS18-31.29-606.4103		10240.8	7697.55	10062.4	16644.6	9033.79	17924.6	17741.3	15047.8	12276.7	8675.55	50788.3	93438.6	79641.5	102249	107384	45578.5	88172.4	100961	99421	99605.3	31608.1	38018.3	61472.1	41146	38520.3
O-Methyl-amentoflavone	biflavonoid	10193	5202.7	3905.6	7151.59	6392.44	0	0	0	0	0	30708.2	103149	124008	341061	583884	22547.5	28925.1	18109.3	27717.1	37631.1	26846	19573.8	26238.5	20412.4	20448.4
BML-LCMS18-36.35-700.5196		9944.96	6345.07	5251.01	4909.86	4759.07	0	0	0	0	0	321098	1.034e+06	1.31868e+06	830295	643174	21585.7	28090.2	18896.1	37798.2	58939.5	21673.6	16192.8	21845.8	22567.2	29707.9
BML-LCMS18-32.46-642.28		9767.93	14444.1	17200.7	16690.3	15740.5	0	0	0	0	0	102075	118010	108713	73349.7	40666.4	0	0	0	0	0	0	0	0	0	0
BML-LCMS18-28.85-274.1907		9393.04	8559.83	10354.9	7168.06	14254.4	1.62663e+06	1.99514e+06	1.59587e+06	1.05114e+06	2.12297e+06	9109.43	22708.5	33303.5	96365.4	167010	6467.43	22597.7	30515.1	14829.5	18991.6	0	0	0	0	0
BML-LCMS18-24.65-310.1581		9242.98	40309.6	134513	35229	162741	150556	87834.2	72381.3	73167.7	37184.2	184169	1.62993e+06	498936	288783	454330	1.02802e+06	961308	832301	1.29153e+06	1.55363e+06	48771.1	15545.9	113437	32157	14659.9
BML-LCMS18-12.85-456.2285		9215.21	7047.69	7541.9	10095.6	9778.21	24621.4	43646.9	37493.7	45314.9	46363.8	6518.56	68355.7	119783	287952	142279	0	0	0	0	0	0	0	0	0	0
BML-LCMS18-34.89-606.2899		9078.74	9347.64	19955.2	18813.4	19883.1	0	0	0	0	0	111757	316679	187334	108915	61698.8	0	0	0	0	0	0	0	0	0	0
BML-LCMS18-15.19-570.1372		8997.11	2339.97	618.104	884.772	1137.85	0	0	0	0	0	1388.04	965.569	62944.5	2.21401e+06	3.01894e+06	1.24116e+07	1.93226e+07	2.60884e+07	1.63832e+07	2.09935e+07	5340.83	2678.84	12367.9	965.331	1754.96
BML-LCMS18-3.23-405.1544		8987.73	33112	87784.1	34938.1	44649.7	37211.2	105049	73350.1	69216	112223	166328	378913	267016	152068	231250	31689.2	45231.4	29237.5	27323.9	114856	169469	164799	140296	172613	200642
BML-LCMS18-27.13-509.3485		8716.39	15880.1	13264.5	9926.69	19095.7	3232.76	3042.47	2514.77	4109.33	1974.82	44854.6	52466	61074.9	155587	130850	29325.2	32235.4	41740.3	31533.3	36827.2	2918.81	5675.03	6435.79	4057.82	2319.11
BML-LCMS18-15.71-475.2413		8699.64	7060.75	6431.42	8402.09	6850.64	0	0	0	0	0	35041.6	149419	236853	361945	304006	8470.08	7351.02	9585.38	9320.71	12170.5	16618.9	20103	18851.9	19109.6	20969.2
BML-LCMS18-26.2-292.1961		8671.18	10053.4	13652.6	10881.1	10945.2	16916.6	30624.4	24158.1	11107	33828	95450.8	37519.2	123128	214771	199837	100674	19460.6	122248	0	97730.5	19880.3	13049.5	13110.5	10257.5	0
BML-LCMS18-26.44-318.215		8625.69	7888.44	12352.4	11065.3	6261.38	36568.9	106959	48906.6	27110.3	60047.9	33730.5	29663.4	46921.4	78345.1	139295	51430.5	125826	198818	63765.3	114098	46186.9	39719.8	60607.7	33480.4	31319.6
BML-LCMS18-29.11-630.3404		8595.9	13303.5	17949	18557.5	21928.7	0	0	0	0	0	184609	211987	214744	364239	382673	0	0	0	0	0	0	0	0	0	0
BML-LCMS18-26.57-533.3482		8535.01	7535.49	9341.89	6178.49	7979.32	0	0	0	0	0	64573.1	69501.4	84228.5	222230	228189	26046.7	17584.1	15134.5	22289.1	24362.4	0	0	0	0	0
BML-LCMS18-15.18-570.1356		8385.15	1244.78	165.619	142.399	423.87	0	0	0	0	0	269.057	0	58907.8	1.84351e+06	2.51647e+06	1.00624e+07	1.59896e+07	2.20187e+07	1.33414e+07	1.72932e+07	3162.8	2248.03	9351.86	767.868	894.18
BML-LCMS18-43.24-831.2321		8377.43	11999.3	7555.35	11123.3	6855.37	8846.19	30996.5	13554	10093.2	9075.71	8791.95	21463.2	15364.7	10724.1	0	163692	434799	476856	522602	672399	11594.4	4331.17	12149.9	6248.47	6836.54
BML-LCMS18-13.51-512.2123		8142.37	7373.08	5490.25	6677.41	6949.64	0	0	0	0	0	5367.24	51120.5	77140.2	133850	86731.1	9105.24	12320	16275.9	21506.1	32680.2	13831	16360.1	19174.1	16558.5	18156.9
BML-LCMS18-27.43-356.2906		8092.09	7409.93	8727.85	7750.18	6773.98	8345.99	10557.4	6539.9	7743.84	9601.72	20373.9	159337	240370	128992	73916.7	76914.2	32689.8	28699.6	65238	107799	7049.01	5800.47	5570.33	6713.5	5574.57
BML-LCMS18-19.27-616.2545		7612.62	10768	17663.3	14148.8	11591.4	17055.1	43013.2	20157.2	36541.7	15745.4	7782.24	2779.21	2287.13	10086.5	5914.27	2149.26	22831.5	12002.2	7322.63	12720.2	75197.1	84719.3	59548.5	62363.8	61737.5
BML-LCMS18-14.63-475.2414		7545.61	5949.74	5649.63	5931.68	5583.03	0	0	0	0	0	31172.6	99524.2	118986	109419	88627.3	0	0	0	0	0	12381.9	13985.6	16227.3	13156.1	12953.9
BML-LCMS18-25.9-254.2209		7538.8	12264	29835.6	8509.97	28230	119980	138225	133887	97724.4	111111	57429.2	154333	82338.8	46016	89426.4	210984	380256	298941	302369	381214	9387.75	4386.47	16209.9	5019.65	3734.8
BML-LCMS18-26.45-394.214		7448.79	9320.48	13408.4	4460.64	13386.8	2.02462e+06	4.58395e+06	2.55918e+06	2.80124e+06	5.12176e+06	76401.4	331480	686779	376094	194236	777239	509573	249773	547064	760236	8123.44	3560.97	15656.4	5534.82	3932.92
BML-LCMS18-26.44-364.2038		7282.02	8230.92	18173.4	9748.82	23517.6	310504	288449	196476	121631	185090	32632.6	131475	53822.2	30578.3	80055.8	1.34322e+06	1.18293e+06	580285	1.31682e+06	1.76662e+06	10417.1	4194.97	20794.7	5584.06	5020.24
BML-LCMS18-27.92-603.3398		6860.83	6585.34	8509.38	7352.66	7543.45	0	0	0	0	0	215425	139068	110019	251659	273486	0	0	0	0	0	0	0	0	0	0
BML-LCMS18-29.57-734.3739		6708.73	9122.81	9568.62	10493	10044.7	3921.45	9013.62	8249.07	5006.36	7089.5	149337	126967	120620	214026	261150	0	0	0	0	0	5711.41	2749.73	6014.39	4734.56	3209.8
BML-LCMS18-37.56-544.4215		5559.82	6206.64	10611.1	19754.4	22253.7	66689	132120	108135	60773.3	89931.6	0	0	0	0	0	90556.3	188519	240166	218024	369062	14224.1	16666.5	19542.1	14093	16436.2
BML-LCMS18-17.8-379.1908		5489.24	11291.9	16959	8785.92	27252.3	18126.7	29520	43809.7	87281.3	26301.2	93560.6	171091	72940.8	12057.1	5392.64	10231.7	15477.6	8394.81	8034.51	14397.3	9560.12	3500.35	20616.1	7762.91	3824.25
BML-LCMS18-12.92-390.1331		5347.7	13487.9	7942.87	4430.51	9987.55	190894	41797.7	50715.1	101167	68286.7	64843.6	29873.6	15646	0	389.525	29511	46443.1	32692.8	44044.7	45328.1	0	0	0	0	0
BML-LCMS18-31.85-606.255		5193.27	6794.62	8844.95	7591.52	9486.83	0	0	0	0	0	110831	135410	153600	140368	89792.1	0	0	0	0	0	0	0	0	0	0
BML-LCMS18-43.25-833.2312		5162.24	6278.42	4415.77	6006.45	3193.96	5876.52	18292.2	7610.67	7237.72	6145.78	5258.26	12456.3	9726.34	5057.69	4493.69	98920.5	277453	298295	314656	421235	6522.48	2993.26	5412.41	3529.26	4320.46
BML-LCMS18-24.1-334.2092		5056.13	5811.02	5674.63	7879.95	5196.93	10376.1	26394.1	11377.2	4485.98	11886	28411.7	16288	36024	114190	223243	58537.9	101047	137023	104865	98479.7	47886.2	41944.1	45298.8	44831.6	48053.8
BML-LCMS18-18.97-404.092		4900.71	5769.08	6826.73	5471.99	6275.67	0	0	0	0	0	5375.79	7585.97	10920.7	15495.3	15372.4	136709	38935	27412.1	89827	83742.4	10345.2	11789.8	11137.6	11566.6	11469.8
BML-LCMS18-16.3-446.1804		4873.35	5000.14	4704.12	6622.2	4799.07	0	0	0	0	0	12659.6	38152.1	48048.5	52693.2	48538.9	12954.2	28686.3	46264.6	28998.4	46387.9	122696	137963	123136	118991	112680
BML-LCMS18-15.36-210.1574		4809.02	0	1287.12	0	1331.87	0	0	0	0	0	24343.1	107778	174158	212975	187248	34982.8	49227.3	50645.7	50623	100926	30887.7	29235.5	27767.9	32293.6	34507.5
BML-LCMS18-24.37-758.3832		4767.3	8184.23	32237.7	13715.9	40364.3	112679	126859	88036.9	117877	83650.4	127112	288337	156616	89866.1	173163	182762	283495	256432	254596	296997	21602.4	9477.32	51032.2	17094.3	11922.5
BML-LCMS18-16.09-580.2297		4753.88	5364.63	7991.84	6897.13	6942.24	60084.7	84576.9	69876.8	147780	69556.1	167334	325177	251253	68515	35410.2	30791.7	40193.8	23096.2	36966.9	65137.9	22266.2	22028.8	27163.9	36099.6	27270.6
BML-LCMS18-25.06-216.1396		4744.54	5654.35	2041.01	5094.37	2281.94	170952	120425	124503	134648	59164.5	5192.62	17365.6	8129.13	6562.11	19992.2	141179	224993	147339	161919	202540	0	0	0	0	0
BML-LCMS18-32.3-638.2804		4368.83	5276.09	12132.1	12105.5	8290.41	0	0	0	0	0	44829.2	108387	181846	289910	230920	0	0	0	0	0	0	0	0	0	0
BML-LCMS18-37.55-540.4277		4362.36	4013.3	7613.39	11164.2	16992	56916.7	193735	87421.3	21409.2	56265.8	0	0	0	0	0	60036.6	176270	171106	174782	321856	0	0	0	0	0
BML-LCMS18-13.82-491.2371		4276.87	7731.93	12811.9	14387.2	14522	10418.2	22120.9	16663.9	16054.7	10157.1	51178	153615	187327	136149	126399	6374.02	18120.8	9669.4	7456.34	27795.5	28606.3	33339.1	30267.5	26202.1	29333.5
BML-LCMS18-19.2-184.0924		3891.05	7458.6	24671.8	14794.7	34306.8	9922.16	28286.8	39197.7	53001.6	17567.6	171496	214957	48224.3	8835.65	2319.49	3815.22	12562	9434.85	6825.6	11339.2	22595.9	6721.63	24350.9	10983	8222.95
BML-LCMS18-17.09-406.0702		3821.3	4102.32	4386.84	3551.13	3445.52	0	0	0	0	0	1319.05	5020.58	9322.26	10932.7	8236.96	180163	46802.6	36428	111837	109631	7000.92	7316.7	6728.29	7004.68	5885.45
BML-LCMS18-14.36-356.1325		3611.55	4574.07	5561.12	4657.46	5473.42	0	0	0	0	0	4404.23	12665.2	58626.7	67183.8	70312.3	281161	285528	287622	292417	357764	0	0	9479.62	8105.45	7786.21
BML-LCMS18-21.41-287.2782		3014.77	20691.1	28937.3	26198.4	54009.7	36254.2	129552	46129.8	21393.9	40170.8	4283.44	11154.5	33812.6	34799.9	36116.9	2313.88	28007.5	5176.34	17532.4	33128.1	24419	34676.3	42267	34052.2	33105.1
BML-LCMS18-15.14-440.2305		2884.02	7076.43	7745.14	3875.45	7200.03	56067.6	59983.9	70793	78866.2	78835.7	11613.2	61367.7	120313	114357	66224.6	11828.4	1657.3	3200.64	1833.16	4374.51	3897.17	7831.73	4620.38	1517.61	3148.24
BML-LCMS18-39.02-825.6649		2774.64	1986.9	6144.15	4306.09	16110.5	262378	285593	215790	115083	170187	6145.25	65312.2	51615.5	68282.7	100861	4600.14	28884.3	43498	56396.9	97571	6812.12	7817.9	14396.5	11147	13158.5
BML-LCMS18-31.38-216.1854		2261.86	2551.38	3387.37	2121.33	1788.98	0	0	0	0	0	25106.2	54958.2	202938	202385	65427.5	5925.7	7226.08	4343.7	4491.43	6825.48	4017.91	3830.07	4428.37	3147.13	3245.29
BML-LCMS18-15.34-393.1994		2064.55	2162.91	3610.96	3203.71	2156.16	66396.5	122611	73994.6	144091	100224	20091.2	75670.2	122515	90787	66655.7	47848.3	45269.5	26704	36923.5	79717.8	15186.2	12967.6	12677.6	10303.8	8442.7
BML-LCMS18-37.08-572.4242		1855.28	2367.01	4121.47	8786.95	12130.6	0	0	0	0	0	0	0	0	0	0	135833	216871	246976	202675	364591	0	0	0	0	0
BML-LCMS18-28.71-630.5732		1811.43	2457.21	1945.61	2391.17	2105.15	0	0	0	0	0	96129.5	38423.1	36585.8	105627	80930.4	0	0	0	0	0	0	0	0	0	0
BML-LCMS18-21.99-410.1842		1804.15	5139.31	6629.38	1822.36	9489.64	67329.5	81509.2	40657.7	57164.8	53182	11880.9	57329.6	33712.4	15942.8	30702.3	170565	214477	159171	186360	230753	6063.03	1578.98	15411.4	4512.52	1471.58
BML-LCMS18-24.37-397.2226		1764.03	2170.73	7892.27	3946.25	8429.69	42823.5	54625.8	27993.5	46675.1	34193.8	46538.9	198784	79215.7	32012.2	94537.6	157288	190944	123664	167533	226475	5334.58	1639.48	12693.7	4019.62	2779.83
BML-LCMS18-16.88-272.0689		1612.81	2824.55	3913.91	2274.63	2991.35	4919.43	150.201	10505.7	23575.7	1543.53	0	916.43	941.402	0	0	71022.4	53368	39822.3	67620.8	81391.9	1019.6	789.115	0	936.729	1213.59
BML-LCMS18-6.71-204.0421		1279.42	9545.61	12576.3	3828.85	5052.74	0	0	0	0	0	227901	340753	2.50649e+06	1.35444e+06	1.86671e+06	3.29344e+06	3.14944e+06	3.4169e+06	4.03684e+06	4.44976e+06	46148	41296.9	48107.3	27599.8	35646.9
BML-LCMS18-18.61-504.1048		1037.95	1569.8	2076.55	3385.26	445.11	117323	53439	137024	176181	89148.4	0	0	0	0	0	4524.59	27897.9	12666.6	8652.6	12626.5	2374.19	837.413	8101.83	2055.19	1055.98
BML-LCMS18-18.45-448.1882		981.432	5047.09	7203.24	2296.27	6042.24	33702.7	25550.8	15728	20898.9	20067.5	18010.6	39912.9	18583	9211	16533.1	78711.2	100330	68243.7	85386.6	109934	27485.9	21531.6	57466.1	23848.4	11736.5
BML-LCMS18-14.04-410.1001		349.133	351.924	1189.37	597.289	0	0	0	0	0	0	0	0	265.099	32358.6	14862.7	1.4332e+06	2.15421e+06	3.49812e+06	2.73177e+06	3.23761e+06	419.156	243.546	948.713	0	0
BML-LCMS18-17.32-412.1917		268.155	7544.75	16450.2	10871.9	18183.8	15197.9	14753.8	8165.15	10818	9614.65	14914.2	69874.6	25518.9	18110.6	53721	191958	227063	153013	176604	237079	70024.8	57586.2	113531	57168	32750.4
BML-LCMS18-15.58-328.1324		253.547	5674.64	14439.6	1381.23	8518.35	564249	177553	1.60943e+06	2.87267e+06	359606	0	0	0	0	0	32087.4	29007.9	23620.2	39882.7	48973.8	0	0	0	0	0
BML-LCMS18-10.02-898.2132		0	0	0	0	0	0	0	0	0	0	11299.8	23126.8	202633	85077.4	33321.3	0	0	0	0	0	209593	275590	88240.3	251253	341854
BML-LCMS18-10.09-373.1696		0	0	0	0	0	33936.3	40594.8	2250.98	1593.93	26229.9	0	0	0	0	0	78949.2	149112	260444	190071	238759	0	0	0	0	0
BML-LCMS18-10.10-356.1477		0	0	0	0	0	103778	133382	30501.8	29680.9	95217.4	85324.6	72205.2	115337	33645.9	101711	224489	401057	701726	520902	625604	10773.7	0	24481.9	10937.8	12435.5
BML-LCMS18-10.22-776.3314		0	0	0	0	0	0	0	0	0	0	218675	175615	121498	20556.8	14835.9	0	0	0	0	0	0	0	0	0	0
BML-LCMS18-10.63-408.1786		0	0	0	0	0	0	0	0	0	0	11004.3	73989.3	109719	176220	146145	21880.6	32553.7	36678.4	35364.8	56492	23045.4	24225.1	25755.4	25508.5	23792.9
BML-LCMS18-10.80-526.2382		0	0	0	0	0	0	0	0	0	0	0	848298	1.55095e+06	1.82473e+06	1.21146e+06	0	0	0	0	0	46160.2	46307.2	52005.3	60080.7	63788.7
BML-LCMS18-10.85-486.2452		0	0	0	0	0	0	0	0	0	0	11624.9	77290	153866	311965	181660	0	0	0	0	0	0	0	0	0	0
BML-LCMS18-11.02-764.2264		0	0	0	0	0	0	0	0	0	0	0	0	212532	50415.9	29826.8	105395	248288	330827	280729	353170	0	0	0	0	0
BML-LCMS18-11.11-494.1423		0	0	0	0	0	13616.9	32278.8	17933.8	21879.4	24374.6	10603.7	14116.8	38179.8	28722.8	19120.5	12433.6	18299.3	20914.1	11715	22600.3	67680.1	77434.8	55819.1	77451.3	68922.3
BML-LCMS18-11.33-538.1849		0	0	0	0	0	145568	163240	195856	228607	133957	13663.2	44130.8	45597.6	26708.4	21837.9	41612.1	49585.7	32565.1	42452.3	72320.2	7429.06	5538.54	9756.04	11605.1	8592.88
BML-LCMS18-11.34-514.2363		0	0	0	0	0	146587	164564	196773	229790	134864	16332.6	46788.1	45619.9	28918.3	23664	41631.3	50331.1	35119.2	41437.2	73661.6	14230.8	13321.1	15471.2	16551.1	13348.7
BML-LCMS18-11.43-244.1311		0	0	0	0	0	0	0	0	0	0	0	0	0	0	0	126371	38320.9	27900	129522	98671.8	35595.9	38105.8	28315.2	44214	47819.7
BML-LCMS18-11.57-468.2248		0	0	0	0	0	81814.5	196233	123178	99111.1	212203	0	0	0	0	0	0	0	0	0	0	0	0	0	0	0
BML-LCMS18-12.43-410.1005		0	0	0	0	0	0	0	0	0	0	0	0	0	0	0	115211	184418	258604	204043	218596	0	0	0	0	0
BML-LCMS18-12.44-612.1449		0	0	0	0	0	0	0	0	0	0	0	0	0	11621.4	22638.6	50366.5	99108.5	98762	81355.4	116485	0	0	0	0	0
BML-LCMS18-12.70-356.1297		0	0	0	0	0	0	0	0	0	0	2980.95	3461.54	59499.2	229744	913807	24925.5	35253.6	45278.6	44914.1	57697.5	17702.2	20766.8	9632.06	14183.3	14082.2
BML-LCMS18-12.84-366.0741		0	0	0	0	0	0	0	0	0	0	0	0	0	0	0	41357	87533.5	69131	72907.1	100867	0	0	0	0	0
BML-LCMS18-12.93-246.0526		0	0	0	0	0	230496	160665	226895	272613	280471	0	0	0	0	0	0	0	0	0	0	0	0	0	0	0
BML-LCMS18-12.95-471.1168		0	0	0	0	0	0	0	0	0	0	23.4575	0	4575.38	8729.07	6770.19	57845.8	150464	175419	83739.8	119041	0	0	0	0	0
BML-LCMS18-13.14-566.1047		0	0	0	0	0	0	0	0	0	0	218.402	104.108	4324.19	89646.1	96475.5	52295.3	153385	129525	69918.4	94349.5	0	0	0	0	0
BML-LCMS18-13.44-430.1171		0	0	0	0	0	0	0	0	0	0	9935.02	67945.6	116808	75509.2	36694.2	0	0	0	0	0	19783.1	19779.1	18284.3	20652.2	26727.8
BML-LCMS18-13.52-367.1839		0	0	0	0	0	0	0	0	0	0	0	0	0	0	0	3413.19	11756.4	17346.5	6919.67	11119.7	85891.1	88837.7	78665.1	74703.7	69358.2
BML-LCMS18-13.60-382.0702		0	0	0	0	0	0	0	0	0	0	0	161.845	949.002	84667.8	101279	48077.3	187044	141742	80531.1	106310	0	0	0	0	0
BML-LCMS18-13.63-544.1244		0	0	0	0	0	0	0	0	0	0	158.47	182.55	890.188	103221	124835	59947	217564	170856	86685.4	121928	0	0	0	0	0
BML-LCMS18-14.18-732.1897		0	0	0	0	0	0	0	0	0	0	5068.76	3523.86	8240.28	38415.1	38824.2	76470.1	204742	214391	119953	192190	0	0	0	0	0
BML-LCMS18-14.31-326.1176		0	0	0	0	0	0	0	0	0	0	0	0	16052.1	18183.3	20210.9	70670.2	81467.9	85823.9	81387.4	96783.6	0	0	0	0	0
BML-LCMS18-14.33-208.1034		0	0	0	0	0	0	0	0	0	0	9460.93	1694.57	10130.5	823759	1.1855e+06	8292.39	14093.3	22551.2	14768	17864.8	24459.3	24429.4	35565	20466.6	16095.2
BML-LCMS18-14.42-410.1005		0	965.132	4906.71	328.189	474.601	0	0	0	0	0	0	0	2253.66	31066	25828	3.1598e+06	2.87357e+06	3.79549e+06	3.87397e+06	4.74134e+06	388.741	104.076	560.038	476.529	0
BML-LCMS18-14.46-554.1434		0	1080.28	5292.88	328.189	796.489	0	0	0	0	0	12828.8	16054.9	0	31067.8	25828.3	2.98505e+06	2.69844e+06	3.59098e+06	3.63355e+06	4.44824e+06	12484.2	12240.2	12574.2	12608.6	11968.1
BML-LCMS18-15.04-732.1938		0	0	0	0	0	0	0	0	0	0	2383.67	1634.39	12906.2	15351.9	27040.2	165492	347413	461917	274612	356839	0	0	0	0	0
BML-LCMS18-15.18-342.1125		0	0	0	0	0	0	0	0	0	0	0	0	558.921	17368.2	32253.1	255137	242786	330445	274711	360488	0	0	0	0	0
BML-LCMS18-15.18-364.0947		0	0	0	0	0	0	0	0	0	0	0	0	0	17368.2	32031.8	255137	242786	330125	274549	360488	0	0	0	0	0
BML-LCMS18-15.22-544.1571		0	0	0	0	0	0	0	0	0	0	0	0	0	0	0	455539	132789	104167	357062	463950	0	0	0	0	0
BML-LCMS18-15.24-978.2208		0	0	0	0	0	0	0	0	0	0	0	0	0	0	0	228354	489497	776696	358872	515712	0	0	0	0	0
BML-LCMS18-15.26-390.0742		0	0	0	0	0	0	0	0	0	0	178.991	379.033	18014	461852	661830	3.83246e+06	6.40021e+06	8.79775e+06	5.27643e+06	6.9832e+06	0	0	0	0	0
BML-LCMS18-15.29-552.1264		0	0	0	0	0	0	0	0	0	0	243.037	117.442	405.678	19614.5	26315.2	179684	282639	390044	232936	313976	0	0	0	0	0
BML-LCMS18-15.38-376.1758		0	0	0	0	0	74468.3	137136	81434.9	144896	107608	15147.7	76864	121508	101759	80125.9	48940.1	44720.1	22139.3	34715.9	90520.9	10750.6	9038.49	10687.9	10975.6	8947.71
BML-LCMS18-15.44-330.1491		0	0	0	0	0	105562	32985.5	339787	540889	91754.9	0	0	0	0	0	0	0	0	0	0	0	0	0	0	0
BML-LCMS18-15.51-582.2303		0	0	0	0	0	0	0	0	0	0	46312.4	100034	121720	118670	132223	4689.96	10234.8	5389.63	7361.67	14111.5	11162.1	10619.1	12354	9114.79	11732.5
BML-LCMS18-15.57-564.2278		0	0	0	0	0	0	0	0	0	0	46613.4	76426.2	77635.1	82424.4	91010	17985.6	19339.9	19925.7	18473.3	26266.3	6950.85	6642.21	7369.38	7205.62	5602.05
BML-LCMS18-15.63-960.2294		0	0	0	0	0	0	0	0	0	0	0	0	0	0	0	30951.5	48836.3	129475	60077.5	73842.4	0	0	0	0	0
BML-LCMS18-15.74-480.3774		0	0	0	0	0	0	0	0	0	0	0	9135.37	16388.5	32456.1	27862.4	0	0	0	0	0	0	0	0	0	0
BML-LCMS18-15.78-944.3689		0	0	0	0	0	0	0	0	0	0	4168.65	6036.62	8386.39	18300.1	50715.6	9481.97	40166.2	38076.4	11814.6	32705.2	218584	282247	151389	249040	227323
BML-LCMS18-15.89-410.1001		0	0	0	0	0	11391.5	9113.26	6844.39	9435.03	4896.86	0	22011.7	33670.2	70785.6	85716.7	371932	249028	178164	364172	482564	0	0	0	0	0
BML-LCMS18-15.97-570.1401		0	0	0	0	0	0	0	0	0	0	0	0	0	0	0	66536.3	75748.2	24942.5	99435.1	155721	0	0	0	0	0
BML-LCMS18-15.99-572.152		0	0	0	0	0	0	0	0	0	0	0	0	0	0	0	185006	132404	81687.7	167460	229514	0	0	0	0	0
BML-LCMS18-16.15-514.21		0	0	0	0	0	2817.09	8413.73	5547.48	4578.07	3551.66	12242.4	74864.8	91207.2	94978.4	66184.4	0	0	0	0	0	4457.41	8237.15	6209.14	6825.26	7634.52
BML-LCMS18-16.29-958.2127		0	0	0	0	0	0	0	0	0	0	0	0	0	0	0	122255	183388	450170	155083	218853	0	0	0	0	0
BML-LCMS18-16.31-440.2364		0	0	0	0	0	64355.9	68973.9	75599	69881.8	81088.6	0	0	19994.7	32402.7	19488.4	0	0	0	0	0	0	0	0	0	0
BML-LCMS18-16.3-612.1269		0	0	0	0	0	0	0	0	0	0	0	0	0	0	0	64860.7	92125.3	223419	60718.3	125022	0	0	0	0	0
BML-LCMS18-16.37-748.2322		0	0	0	0	0	0	0	0	0	0	35332.7	80844.3	204433	54815.8	25964.7	75848.7	192934	182996	103358	135902	0	0	0	0	0
BML-LCMS18-16.3-953.256		0	0	0	0	0	0	0	0	0	0	0	0	0	0	0	45787	66198.1	166742	64465.1	83631.5	0	0	0	0	0
BML-LCMS18-16.42-974.3791		0	0	0	0	0	0	0	0	0	0	0	0	0	0	0	19727.6	59958.5	44075.7	21597.9	39268.8	234712	307327	224605	219447	251610
BML-LCMS18-16.46-490.0907		0	0	0	0	0	85488.2	80138.8	87450.2	119414	129600	0	0	0	0	0	0	0	0	0	0	0	0	0	0	0
BML-LCMS18-16.56-798.176		0	0	0	0	0	0	0	0	0	0	0	0	0	0	0	58824.8	110744	150996	149976	181326	0	0	0	0	0
BML-LCMS18-16.97-490.0916		0	0	0	0	0	664961	587434	529315	804080	873755	0	0	0	0	0	0	0	0	0	0	0	0	0	0	0
BML-LCMS18-17.04-250.0867		0	0	0	0	0	60186.8	9929.2	136430	345644	32316.4	0	0	0	0	0	71611.3	53368	39822.3	67620.8	81680.5	0	0	0	0	0
BML-LCMS18-17.16-608.0956		0	0	0	0	0	2887.83	4034.54	3974.19	2887.87	4803.39	1081.18	332.828	36274.7	60019.2	62955.7	86934.8	312455	329726	227464	338902	0	0	0	0	0
BML-LCMS18-17.22-526.2396		0	0	0	0	0	33872.4	37029.4	41648.6	34274.3	51542.2	0	0	0	0	0	0	0	0	0	0	0	0	0	0	0
BML-LCMS18-17.24-490.0925		0	0	0	0	0	119854	126424	155665	277186	181954	0	0	0	0	0	0	0	0	0	0	0	0	0	0	0
BML-LCMS18-17.31-746.2186		0	0	0	0	0	0	0	0	0	0	4820.59	5945.54	41908.5	71807.3	58030.9	53443.2	123642	139673	67628.1	76630.4	19080.7	13986.9	15504.8	9796.44	11281.2
BML-LCMS18-17.36-342.149		0	0	0	0	0	113654	35368.4	84207.3	183389	34604.9	0	0	0	0	0	0	0	0	0	0	0	0	0	0	0
BML-LCMS18-17.38-774.1788		0	0	0	0	0	0	0	0	0	0	0	0	0	0	0	209868	315870	427142	292509	393043	0	0	0	0	0
BML-LCMS18-17.76-772.1617		0	0	0	0	0	19431.3	47982.7	26693.1	36045.8	51462.5	0	0	0	0	0	68641.3	133814	178328	110755	171406	0	0	0	0	0
BML-LCMS18-17.79-323.0797		0	0	0	0	0	0	0	0	0	0	8479.74	49608.5	197714	253706	175937	176663	590705	640379	291531	403183	0	0	0	0	0
BML-LCMS18-17.86-482.1444		0	5094.9	457.351	233.529	549.016	49558	62553.6	39934.6	52512.5	12536.6	0	0	0	0	0	36857.7	150604	107874	60023.1	114582	4191.84	1030.09	9159.3	2150.39	0
BML-LCMS18-17.94-708.146		0	0	0	0	0	303169	400947	351561	603414	580996	0	0	0	0	0	0	0	0	0	0	0	0	0	0	0
BML-LCMS18-17.96-376.0943		0	0	0	0	0	0	0	0	0	0	0	11052.7	87343.1	13092.3	9389.04	29080	54471.8	101970	82238.3	82690	0	0	0	0	0
BML-LCMS18-17.97-394.1061		0	0	0	0	0	0	0	0	0	0	0	12731.7	119303	19864.9	15600.3	24252.2	71671.4	80868.2	90266.7	113991	0	0	0	0	0
BML-LCMS18-18.21-344.1648		0	0	0	0	0	327724	158296	46531.2	27312.7	88867.5	0	0	0	0	0	52905.5	44529.8	19621.1	52341.6	56667.3	0	0	0	0	0
BML-LCMS18-18.27-772.1633		0	0	0	0	0	0	0	0	0	0	0	0	0	0	0	92464.8	145983	207982	118968	175985	0	0	0	0	0
BML-LCMS18-18.51-312.1394		0	0	0	0	0	331000	117993	559953	953698	212564	0	0	0	0	0	160414	77831.5	58165.1	119705	135633	0	0	0	0	0
BML-LCMS18-18.74-751.1518		0	0	0	0	0	232921	175777	216427	332539	334013	0	0	0	0	0	0	0	0	0	0	0	0	0	0	0
BML-LCMS18-18.77-734.1261		0	0	0	0	0	955311	757980	917627	1.32885e+06	1.37826e+06	0	0	0	0	0	0	0	0	0	0	0	0	0	0	0
BML-LCMS18-18.81-268.1666		0	0	0	0	0	0	0	0	0	0	0	0	0	0	0	36949.2	32862.9	25825.5	54900	48410.7	79900.2	81153.6	70728.4	84666.6	101564
BML-LCMS18-18.93-321.0631		0	0	0	0	0	0	0	0	0	0	0	0	49348.9	195333	257466	31725.8	110191	128509	58149.3	72803.7	0	0	0	0	0
BML-LCMS18-19.19-206.1004		0	26002.4	86935.1	43524.1	123125	52022	102386	143080	206483	62339.8	711973	848554	195499	30109.9	0	31426.9	53351.8	49976	50438.5	55222.2	83183.7	26107.6	96854.9	40194.3	31774
BML-LCMS18-19.19-379.1902		0	26084.5	88108.1	45729.6	128059	48647	106059	146806	213083	64473.3	770395	949145	207087	28601.1	0	35989.3	57687.5	44083.6	29120.5	55610.9	83410.2	26379.6	99135.2	36879.1	27737
BML-LCMS18-19.19-607.2721		0	33132.3	113120	54932.9	162178	58149.8	138354	196559	286552	85027.7	961627	1.27412e+06	273136	33885.9	15603.9	34492.1	77754.2	59210.2	47754.1	74503.1	125200	33403.6	122227	45834.6	31738.6
BML-LCMS18-19.21-734.126		0	0	0	0	0	57492.5	82498.1	166134	253720	240302	0	0	0	0	0	0	0	0	0	0	0	0	0	0	0
BML-LCMS18-19.24-308.1601		0	0	0	0	0	0	0	0	0	0	0	0	0	0	0	159925	43763.2	31759.6	157167	111881	131195	150557	137948	152662	196928
BML-LCMS18-19.29-464.1862		0	0	0	0	0	0	0	0	0	0	0	0	0	0	0	22549.1	37268.1	33180.7	30772.4	35860	7865.84	4146.05	11946.6	5839.63	2617.18
BML-LCMS18-19.47-420.1924		0	0	0	0	0	59106.7	41685.2	27682.5	31278.7	26541.2	9651.91	29369.6	16917.8	9286.44	24454.3	115594	84368.9	43292.7	71486.9	111633	0	0	0	0	0
BML-LCMS18-19.5-642.1367		0	0	0	0	0	0	0	0	0	0	0	0	0	0	0	36553.2	74382.3	91082.7	99485.1	121234	0	0	0	0	0
BML-LCMS18-2.5-322.1617		0	0	0	0	0	222116	513777	286293	309613	448243	27365.5	157214	211181	253045	171635	80120.1	86057	87312.9	74804.1	212883	0	0	0	0	0
BML-LCMS18-20.19-748.141		0	0	0	0	0	145593	84622.7	151139	290083	160715	0	0	0	0	0	0	0	0	0	0	0	0	0	0	0
BML-LCMS18-20.2-308.1453		0	0	0	0	0	47723.8	20371	21552.8	28656.9	14880.5	0	0	0	0	0	45390.1	69625.7	51228.1	41738.2	51919.3	9626.7	5707.4	12844.8	9448.98	5015.26
BML-LCMS18-20.36-406.0683		0	0	0	0	0	0	0	0	0	0	0	0	0	0	0	141683	38072.4	28831.3	88726.4	78917.2	0	0	0	0	0
BML-LCMS18-20.39-454.1998		0	0	15441.3	8679.71	24290.9	0	0	0	0	0	237284	294353	87018.7	14410.4	0	0	0	0	0	0	0	0	0	0	0
BML-LCMS18-20.58-298.1584		0	0	0	0	0	0	0	0	0	0	32684	110742	76703.2	46528.2	141735	15248.4	14535.2	14443.4	20866.9	22595.8	0	0	0	0	0
BML-LCMS18-20.65-326.1542		0	0	0	0	0	41926.3	25185.3	19680	7193.35	14656.5	0	18376.5	0	7588.54	0	73570.5	98795.2	82653.6	91115.4	111510	0	0	0	0	0
BML-LCMS18-21.17-234.0896		0	4815.6	3361.31	0	1018.1	213068	183069	395886	445027	76544.3	0	5946.07	0	1077.21	11345.7	84151.2	177679	138378	136463	142990	0	0	0	0	0
BML-LCMS18-21.25-410.2092		0	0	0	0	0	135424	299616	149007	313205	383099	0	0	0	0	0	0	0	0	0	0	0	0	0	0	0
BML-LCMS18-21.25-428.2197		0	0	0	0	0	90108.8	199819	104099	235815	265390	0	0	0	0	0	0	0	0	0	0	0	0	0	0	0
BML-LCMS18-21.36-398.2076		0	0	0	0	0	79079.4	74176.8	60510	100771	51240.3	36681.5	148496	66139.3	39066.7	76755.4	127589	178292	135257	147554	186238	13046.1	8928.35	22818.2	12886.3	11388.3
BML-LCMS18-21.38-380.1981		0	0	0	0	0	43782.4	27651.7	24239.5	38931	21429.8	15085.4	73203.7	32305.6	19985.5	40975.8	87609.6	109675	87659.8	96261.6	125736	0	0	0	0	0
BML-LCMS18-21.45-428.2204		0	0	0	0	0	38481.2	86487.8	38382.5	82528.9	109417	3198.51	11110.1	10213.9	6849.59	8985.87	0	0	0	0	0	0	0	0	0	0
BML-LCMS18-21.7-234.0914		0	0	0	0	0	91583.9	124062	173549	144907	23654.7	0	0	0	0	0	12116.6	47918.7	36241.6	24222.2	33100.2	0	0	0	0	0
BML-LCMS18-21.88-528.3754		0	0	0	0	0	348.224	634.457	1.34885e+06	282350	36487.8	0	0	0	0	0	0	0	0	0	0	0	0	0	0	0
BML-LCMS18-21.98-614.2703		0	0	0	0	0	0	0	0	0	0	0	0	0	0	0	306086	173739	67353.7	288984	106269	22362.9	28785.3	55593	57672.9	18136.1
BML-LCMS18-21.99-256.0756		0	1419.88	2981.89	0	5672.92	51629	52158.9	28650	42050	41728.5	4751.86	41644.1	25303.6	10647.4	21637.7	140816	179576	129164	163898	204292	1808.97	0	10100.3	3060.71	0
BML-LCMS18-22.06-338.1521		0	0	0	0	0	37441.1	35484.7	33210.8	42273	29862.6	8517.44	32752.5	18955.6	12342.7	32535.4	106121	126142	101582	120774	146970	0	0	0	0	0
BML-LCMS18-22.06-413.2213		0	0	0	0	0	22542.2	23765.8	11871.6	17802.2	18204.2	4733.79	20547.5	12228.1	7941.38	10058.2	66728.8	92148.5	62720.7	79939.6	96510.2	0	0	0	0	0
BML-LCMS18-22.06-846.3039		0	0	0	0	0	23467.6	23948.7	8726.1	15155.6	15556.1	792.986	16447	8835.93	2476.02	4872.13	64135.9	140181	88507.1	115626	137230	0	0	0	0	0
BML-LCMS18-22.12-304.17		0	0	0	0	0	0	0	0	0	0	11180.2	22454.2	22964	53277.4	74501	365844	354068	227620	450639	525521	0	0	0	0	0
BML-LCMS18-22.15-364.2011		0	0	0	0	0	22500.9	27132.2	21397.4	25964.9	18881.1	0	0	0	0	0	85976.2	37214.7	23733.6	53898.4	90772.1	0	0	0	0	0
BML-LCMS18-22.19-638.2535		0	0	0	0	0	12579	8684.03	11107.5	13193.9	5577.46	0	0	0	0	0	106262	178058	123651	103974	156239	0	0	0	0	0
BML-LCMS18-22.64-394.2094		0	0	0	0	0	64626.4	95666.6	60956.3	78950.5	112409	0	0	0	0	0	16691.5	3125.52	783.908	9071.76	10342.6	0	0	0	0	0
BML-LCMS18-22.73-374.2102		0	0	0	0	0	35820.6	56175.9	15923	70735.7	74094.6	0	25055	21939.5	33757.2	44628.3	181831	110616	67192.9	197622	255021	0	0	0	0	0
BML-LCMS18-22.93-340.1352		0	0	0	0	0	0	0	0	0	0	0	0	0	0	0	98714.1	71826.8	58285.2	120197	101925	39990.8	45174	47793.3	50191.3	60504.9
BML-LCMS18-23.12-578.2768		0	0	0	0	0	0	0	0	0	0	0	0	0	0	0	164875	74930.4	36319.5	140432	104186	0	0	0	0	0
BML-LCMS18-23.25-427.2344		0	0	0	0	0	334563	250636	143559	193919	190367	9965.64	37799	24467	11434.3	15992.7	105598	160303	117324	123302	159873	8933.91	3853.81	16682.4	7600.64	5057.83
BML-LCMS18-23.27-270.0918		0	0	0	0	0	180107	151502	91006.6	121322	121804	0	23774.4	17441.3	2916.49	5390.67	59479.8	87012.1	65745.3	68408.9	86473.9	0	0	0	0	0
BML-LCMS18-23.27-352.168		0	0	0	0	0	144510	116381	72369.7	96408.1	94977	10890.7	28403.4	14283.9	13216.2	8610.73	53949.2	86104.3	60246.7	63565.8	79596.1	0	0	0	0	0
BML-LCMS18-23.56-317.2919		0	0	0	0	0	181378	130068	98124.6	80487.5	104877	17243.6	33481.5	45210.4	44586.7	67955.9	3307.64	6418.11	9037.55	8920.15	11670.1	2710.72	1920.76	2300.53	1434.74	2385.91
BML-LCMS18-23.76-380.1989		0	0	0	0	0	14303.6	62342.9	19126.8	11896.3	15340.4	0	50490.4	63025.3	120686	141596	1.11191e+06	448338	263328	1.08254e+06	1.62797e+06	0	0	0	0	0
BML-LCMS18-23.92-606.2659		0	0	0	0	0	22100.1	16024.2	18328.5	16790.4	7680.41	0	0	0	0	0	69236.8	89240.6	57493.5	63885.1	97851.7	3506.88	4689.56	7473.05	7527.02	4752.5
BML-LCMS18-24.18-308.1978		0	0	0	0	0	0	0	0	0	0	37899.7	14954.1	21086.4	25934.2	41123.2	250652	255730	266864	263927	338103	17807.4	15847.1	12113.7	18205.5	17906.4
BML-LCMS18-24.34-591.3022		0	0	0	0	0	0	0	0	0	0	0	0	0	0	0	213146	34942.4	20670	171206	134179	0	0	0	0	0
BML-LCMS18-24.42-240.0804		0	0	0	0	0	29000.2	34130.1	18954.5	31905.4	24643.3	26813.6	101480	51433.9	20882.4	64528.3	105139	110162	77963.6	108564	143035	0	0	0	0	0
BML-LCMS18-24.42-322.1565		0	0	0	0	0	27077.7	31602.4	16251.3	24274.3	19247	21136.8	77325.8	37284.4	17079.3	44536.2	76701.3	78345.2	62290.2	76240.3	90659.7	0	0	0	0	0
BML-LCMS18-24.48-410.2105		0	0	0	0	0	214119	455118	214886	446584	468478	0	46245.5	39047.3	25494.6	23531.3	17678.4	12810.9	13747.4	16110.1	15152	0	0	0	0	0
BML-LCMS18-24.7-254.0953		0	0	0	0	0	12490.6	5184.81	5317.06	0	0	20599.6	194781	62737.6	25197	54520.4	117966	112419	102150	153060	182252	0	0	0	0	0
BML-LCMS18-24.95-436.2768		0	0	0	0	0	83746.4	101624	92940.9	97700.9	80511.7	117667	762875	837081	463370	364297	48411.2	32322.3	17980	56648.1	99581.2	8713.14	6318.05	10010	26307.8	14530.7
BML-LCMS18-24.99-256.2382		0	0	0	0	0	9408.21	13332.6	9525.74	11833.6	12848.9	19352.4	84548	137453	58684.2	57626	0	0	0	0	0	0	0	0	0	0
BML-LCMS18-25.00-619.3543		0	0	0	0	0	0	0	0	0	0	250825	109134	81721.3	52488.3	108268	0	0	0	0	0	0	0	0	0	0
BML-LCMS18-25.00-624.3101		0	0	0	0	0	0	0	0	0	0	307506	132437	103457	60566.5	133317	0	0	0	0	0	0	0	0	0	0
BML-LCMS18-25.19-380.1998		0	0	0	0	0	48291.3	63639.9	38929.7	52871.6	91301.3	6845.57	13715.6	63075.4	19144.6	10113.7	4.86115e+06	3.90754e+06	1.17661e+06	4.36231e+06	6.48504e+06	21625.9	0	0	0	0
BML-LCMS18-25.26-576.2925		0	0	0	0	0	0	0	0	0	0	15000	82188	85832.5	68625.5	63988.7	12479.1	8695.08	11887.7	13936.2	15008.8	0	0	0	0	0
BML-LCMS18-25.28-196.1162		0	0	0	0	0	0	0	0	0	0	25253	167501	76021.5	20935.2	103711	338851	222893	163984	381942	461762	0	0	0	0	0
BML-LCMS18-25.31-514.3116		0	0	0	0	0	23411	27074.5	22302.9	11838.2	17103.6	21902.9	145112	161706	115249	116270	23398.2	26581.5	18784.5	34357.2	31787.5	0	0	0	0	0
BML-LCMS18-25.32-370.2713		0	0	0	0	0	64072.1	50143.2	25571	31149.1	32440.5	92126.4	558649	603637	443754	416496	65673	65761.1	54332	101667	97823	0	0	0	0	0
BML-LCMS18-25.33-300.1715		0	0	0	0	0	95479.6	143675	86754.9	104195	148378	0	0	0	42230.8	68301.1	749737	613374	200172	699448	1.0344e+06	0	0	0	0	0
BML-LCMS18-25.35-256.074		0	0	0	0	0	416329	642986	379008	465978	707654	8758.35	57668.3	75224.9	225812	329737	3.90009e+06	3.06272e+06	936697	3.51861e+06	5.20173e+06	0	0	0	0	0
BML-LCMS18-25.35-380.1988		0	0	0	0	0	36824.6	30026	14167.8	19441.1	15316.5	53521.5	327491	362656	263447	244823	0	0	0	0	0	0	0	0	0	0
BML-LCMS18-25.42-460.2434		0	0	0	0	0	40222.7	38685.5	41342.6	43551.3	47393.1	20619.4	57601	46109.6	48866.3	51578.6	153993	197862	128035	155427	195539	0	0	0	0	0
BML-LCMS18-25.4-266.163		0	0	0	0	0	55432.4	42312.1	38565.7	26179.4	38863.8	0	35976	21451.4	94140.5	115170	318851	326437	135249	499419	514939	0	0	0	0	0
BML-LCMS18-25.95-536.2984		0	2055.71	18427.4	2471.42	15725	174920	208868	186994	136771	160711	49640	218157	134398	58483.4	127715	493124	640453	406048	519068	725887	1909.95	0	7161.08	0	369.282
BML-LCMS18-25.96-268.1623		0	0	0	0	0	0	0	0	0	0	123092	79078.4	62142.5	60638.2	165522	20292.2	12253.6	16976.4	20558.9	19772.5	0	0	0	0	0
BML-LCMS18-25.97-630.2875		0	0	0	0	0	22587.8	18345.9	13903.1	15791.6	10814.1	0	0	0	0	0	150152	111555	44932	132717	185565	0	0	0	0	0
BML-LCMS18-26.25-407.1893		0	0	0	0	0	128388	244013	120855	165772	268229	0	0	0	0	0	1922.98	4930.05	1752.37	1147.34	3777.8	0	0	0	0	0
BML-LCMS18-26.25-408.1991		0	0	0	0	0	1.11269e+06	2.29631e+06	1.09185e+06	1.5306e+06	2.75373e+06	7912.47	7723.47	11102.7	13588.4	11673.5	18177.6	29214.6	17650	12888.2	17791.9	0	0	0	0	0
BML-LCMS18-26.31-284.0703		0	0	0	0	0	191215	351860	185539	263645	409765	0	0	0	0	0	1896.96	4247.3	0	1741.77	767.947	0	0	0	0	0
BML-LCMS18-26.32-404.1253		0	0	0	0	0	32293.9	56637.3	36379.7	45988.8	62262.6	0	0	0	0	0	0	0	0	0	0	0	0	0	0	0
BML-LCMS18-26.4-270.1581		0	0	0	0	0	61004	142358	87053.8	77257.3	135119	0	0	0	0	0	0	0	0	0	0	0	0	0	0	0
BML-LCMS18-26.4-597.3653		0	0	0	0	0	0	0	0	0	0	75371.8	45282.3	35815.9	25982.6	62717.1	12079.7	5025.58	14379.6	11031.7	14312.1	0	0	0	0	0
BML-LCMS18-26.51-394.2145		0	0	0	0	0	2.09745e+06	4.62146e+06	2.65153e+06	2.87944e+06	5.29226e+06	80625.1	325889	685105	363213	205742	775741	511596	243477	534044	779760	0	0	0	0	0
BML-LCMS18-26.5-240.0812		0	0	1464.33	0	4769.26	28956.2	28097.5	20861.2	16540.1	20925	0	2494.7	704.709	0	6508.96	305256	242488	124629	306527	403972	0	0	0	0	0
BML-LCMS18-26.52-432.1785		0	0	0	0	0	93554.2	170963	111526	123541	188746	0	12098.9	19268.4	12061.5	6376.41	13760.6	8445.37	7442.9	9713.36	14680.6	0	0	0	0	0
BML-LCMS18-26.5-288.1005		0	0	0	0	0	395611	809235	498524	545650	918229	6628.52	68141.4	142258	77590.4	45187.5	174132	116056	52823.7	121927	173210	0	0	0	0	0
BML-LCMS18-26.5-412.2291		0	0	0	0	0	61102.2	193878	83195.2	96194.1	245990	266.101	3429.84	9502.71	5432.49	600.439	5325.62	3657.95	2024.56	2802.61	7338.72	0	0	0	0	0
BML-LCMS18-26.58-368.1701		0	0	0	0	0	110002	163236	144588	157187	184445	13029.5	34979.8	50498.1	47137.9	30378.6	0	19318.4	23898.5	17357.7	23736.1	0	0	0	0	0
BML-LCMS18-26.92-674.3228		0	0	0	0	0	48480.5	45184.9	45002.6	41323.5	39250.1	0	0	0	0	0	95007.9	228294	146422	123325	150980	0	0	0	0	0
BML-LCMS18-27.22-320.2299		0	0	0	0	0	0	0	0	0	0	22426.4	48438.3	36646.2	29572.5	58957.1	174323	190661	237083	193379	290104	29508	27677.9	20489.3	23187.9	28878.3
BML-LCMS18-27.3-774.3759		0	0	0	0	0	37155	65291	34484.6	65564.9	64401.2	19344.7	9578.36	18234.5	11350	16968.4	90841.2	212337	90621.3	109636	128233	0	0	0	0	0
BML-LCMS18-27.64-304.2384		0	0	0	0	0	4849.68	38430.6	11995	0	11165.7	18500	374.318	14379.2	40661.5	60028.6	52188.3	109937	103536	67778	78042.4	43144.1	32268.1	66770.2	35010.1	28462.2
BML-LCMS18-27.66-362.1884		0	0	0	0	0	27376.3	43311	20480.6	26015.5	33731.6	0	6495.68	12285	5240.11	0	108183	77553.2	40198.1	72230.8	101593	0	0	0	0	0
BML-LCMS18-27.69-408.1961		0	0	0	0	0	76880.4	98065	87113.3	100514	81103.6	10101.5	27272.2	28558.7	12923.9	17737.3	50323.4	59779.2	38500.4	60632.6	73991.4	0	0	0	0	0
BML-LCMS18-27.71-540.3226		0	0	0	0	0	0	0	0	0	0	27786.4	37804	54591.8	72588	68704.7	28767.4	28682.6	18621.2	29997	30061.6	0	0	0	0	0
BML-LCMS18-27-394.2144		0	0	0	0	0	45459.2	32706.7	54141.5	52621.5	68646	9615	15490.1	49519.8	8430.39	56140.6	47175.1	37253.1	24857.8	44814.4	59155.7	0	0	0	0	0
BML-LCMS18-28.08-124.0894		0	0	0	0	0	0	0	0	0	0	0	0	0	0	0	48794.1	59018	151053	68692.9	57731.5	0	0	0	0	0
BML-LCMS18-28.09-332.1952		0	0	0	0	0	0	0	0	0	0	20616.4	13813.9	12331.4	10268.2	11866	61899	63548.9	167402	67575.7	79202.9	0	0	0	0	0
BML-LCMS18-28.16-278.2194		0	0	0	0	0	0	0	0	0	0	0	0	0	0	0	247374	204005	260022	306926	359875	36992.7	36401.9	37297.7	25592.8	35360.8
BML-LCMS18-28.23-774.3747		0	0	0	0	0	186425	269136	111695	239096	311724	14039.3	20313.3	27905.4	22161	28190	212697	481434	222615	245640	333544	0	0	0	0	0
BML-LCMS18-28.54-774.377		0	0	0	0	0	73773	119003	58241.4	66304.4	83505.5	11766.5	21774.2	28616.7	17639.3	14895.2	177064	216254	119750	168446	262506	0	0	0	0	0
BML-LCMS18-28.55-758.381		0	0	0	0	0	78984.7	134460	57073.5	133865	84457.2	27961.1	27839.2	43756.6	26685.9	43251.1	178098	137036	59677	191281	201996	0	0	0	0	0
BML-LCMS18-28.71-386.2429		0	8250.75	10252.3	8054.03	10468.9	0	0	0	0	0	176262	120859	105042	186085	163180	0	0	0	0	0	0	0	0	0	0
BML-LCMS18-28.74-452.1862		0	0	0	0	0	84429.6	169039	84152.9	101513	184317	0	0	0	0	0	0	0	0	0	0	0	0	0	0	0
BML-LCMS18-28.86-772.361		0	0	0	0	0	297149	615832	199014	553019	569716	0	0	0	0	0	0	0	0	0	0	0	0	0	0	0
BML-LCMS18-28.95-254.0957		0	0	0	0	0	130888	260562	187065	109907	223782	0	0	0	0	0	0	0	0	0	0	0	0	0	0	0
BML-LCMS18-28.95-378.2183		0	0	0	0	0	579853	1.06402e+06	823096	442123	915772	0	0	0	0	0	0	0	0	0	0	0	0	0	0	0
BML-LCMS18-29.49-1024.549		0	0	0	0	0	0	0	0	0	0	0	0	0	0	0	52692.8	128425	139175	94097.9	103116	0	0	0	0	0
BML-LCMS18-29.52-480.2533		0	0	0	0	0	0	0	0	0	0	19424.7	137119	210004	38758.2	0	138547	268120	361118	193430	219326	0	0	0	0	0
BML-LCMS18-29.55-655.3685		0	0	0	0	0	0	0	0	0	0	145774	79224.2	58725	129677	105671	0	0	0	0	0	0	0	0	0	0
BML-LCMS18-29.5-758.3794		0	0	0	0	0	225909	445232	201178	350848	307879	16271.3	39946.3	51211.1	55837.4	36450.7	0	0	0	0	0	0	0	0	0	0
BML-LCMS18-29.69-348.1934		0	0	0	0	0	46599	63411.5	92108.8	58616.7	89995.5	48703.9	56550	1950.7	328.119	502.163	0	0	0	0	0	0	0	0	0	0
BML-LCMS18-29.69-772.3778		0	0	0	0	0	219862	382169	257718	230874	454405	0	0	0	0	0	0	0	0	0	0	0	0	0	0	0
BML-LCMS18-29.73-758.3802		0	0	0	0	0	373874	515293	310255	465052	454964	49302.8	109002	78849	60872.4	116651	225380	351309	285232	267851	366099	0	0	0	0	0
BML-LCMS18-3.46-389.1687		0	20622.9	44453.1	0	20442.3	32423.8	98412.6	79283.3	78971.4	103678	336914	306628	95285.5	151160	686023	15575.3	37189.8	31930.1	19785.9	121029	85398.2	81568.7	87740.5	50709	91100.1
BML-LCMS18-3.84-343.1267		0	0	0	0	0	24186.6	63722.6	27414.8	58730.6	70720.7	25168.5	58286.3	65446.7	297760	212659	48849.6	178155	138125	88456.2	282046	474765	681055	309843	527404	457713
BML-LCMS18-30.08-742.3859		0	0	0	0	0	155233	232982	142915	127095	209231	0	0	0	0	0	97248	217808	121077	156653	189459	0	0	0	0	0
BML-LCMS18-30.08-758.3804		0	0	0	0	0	261120	400980	211015	396628	414739	0	0	0	0	0	319127	292785	132979	429179	579615	0	0	0	0	0
BML-LCMS18-30.19-688.3394		0	0	0	0	0	98636.4	108993	68851.1	127248	97415.9	22362.6	38506.5	28928.7	16653.8	49296.2	223468	299177	254506	307974	309494	0	0	0	0	0
BML-LCMS18-30.29-478.2365		0	0	0	0	0	0	0	0	0	0	41050.9	65692.6	864183	536315	172127	453254	1.7183e+06	3.18198e+06	969512	705739	0	0	0	0	0
BML-LCMS18-30.38-640.3665		0	0	0	0	0	9872.86	21705.4	21431.1	13330.8	16056.6	347521	154681	98334.3	215635	246830	18784.1	12166.9	15641.1	17483.5	23066.7	0	0	0	0	4964.51
BML-LCMS18-30.45-688.341		0	0	0	0	0	86403.5	69552.5	70406.8	95503.4	82846	0	0	0	0	0	167594	289703	193818	179512	202274	0	0	0	0	0
BML-LCMS18-30.55-350.2438		0	0	0	0	0	0	0	0	0	0	0	0	0	0	0	197519	75349.9	72064.3	184272	186480	0	0	0	0	0
BML-LCMS18-30.59-622.2443		0	0	0	0	0	0	0	0	0	0	14185.8	40918.6	153669	221550	181315	0	0	0	0	0	0	0	0	0	0
BML-LCMS18-30.62-408.2836		0	0	0	0	0	0	0	0	0	0	0	76770.5	49562.5	107133	149210	0	0	0	0	0	0	0	0	0	0
BML-LCMS18-30.62-426.2924		0	0	0	0	0	0	0	0	0	0	135012	92100.9	66804.8	139212	212145	0	0	0	0	0	0	0	0	0	0
BML-LCMS18-30.62-742.3852		0	0	0	0	0	477258	542180	394746	328668	403695	39807.7	71937.3	65824.9	51214	62108.5	585866	1.22448e+06	783030	955307	1.14429e+06	0	0	0	0	0
BML-LCMS18-30.67-607.3729		0	0	0	0	0	0	0	0	0	0	0	0	0	0	0	36128.6	48449.9	40498.5	43751.8	48088.2	8933.9	9989.17	10411.5	15893.5	16337
BML-LCMS18-30.77-478.2374		0	0	0	0	0	0	0	0	0	0	18576.4	60122.8	621140	431848	172728	90071.5	109106	452452	227898	155973	0	0	0	0	0
BML-LCMS18-30.8-772.3949		0	0	0	0	0	124162	233980	111902	119503	236171	0	0	0	0	0	0	0	0	0	0	0	0	0	0	0
BML-LCMS18-31.2-474.2979		0	0	0	0	0	0	0	0	0	0	83957.7	252389	501110	218542	131231	0	0	0	0	0	0	0	0	0	0
BML-LCMS18-31.29-350.2766		0	0	0	0	0	0	0	0	0	0	0	0	0	0	0	48266.9	80875.1	74588.2	53896.9	66922	0	0	0	0	0
BML-LCMS18-31.37-636.2596		0	0	0	0	0	0	0	0	0	0	0	93518.1	392598	247978	170746	0	0	0	0	0	0	0	0	0	0
BML-LCMS18-31.67-746.4117		0	0	0	0	0	88306.8	193736	114279	84227.3	200209	0	0	0	0	0	0	0	0	0	0	0	0	0	0	0
BML-LCMS18-31.85-618.3778		0	0	7467.58	8709.32	7220.74	11750.1	13397.8	19221.9	12778.8	10574.6	179914	135936	124770	286014	334760	0	0	0	0	0	0	0	0	0	0
BML-LCMS18-32.06-756.4008		0	0	0	0	0	97904.8	230741	103251	49307.1	183620	0	0	0	0	0	0	0	0	0	0	0	0	0	0	0
BML-LCMS18-32.31-622.2799		0	0	0	0	0	0	0	0	0	0	42548.9	316259	864346	551264	386967	0	0	0	0	0	0	0	0	0	0
BML-LCMS18-32.61-779.5487		0	0	0	0	0	0	0	0	0	0	0	0	0	0	0	150353	111303	108417	127692	171222	0	0	0	0	0
BML-LCMS18-32.62-308.2677		0	0	0	0	0	8491.04	13959.5	14073.3	14518.6	15871.3	22543.9	58896.3	61930.1	87743.6	140545	0	0	0	0	0	0	0	0	0	0
BML-LCMS18-32.63-739.5548		0	0	0	0	0	0	0	0	0	0	8465.5	12042.7	8410.6	6178.22	9039.06	341534	291939	269117	332621	432451	0	0	0	0	0
BML-LCMS18-32.77-444.3563		0	0	0	0	0	0	0	0	0	0	0	22478.7	30350.3	41765.4	31956.1	222972	107900	101566	184387	227107	14307.1	15053	11290.3	11700.9	11709.2
BML-LCMS18-32.78-428.4219		0	0	0	0	0	0	0	0	0	0	150065	122615	99723.7	108901	118024	0	0	0	0	0	0	0	0	0	0
BML-LCMS18-32.78-484.3472		0	0	0	0	0	0	0	0	0	0	2257.81	9035.96	19601.7	28657.9	24081.5	133175	80570.1	79150.3	103570	123361	9874.53	2352.78	2688.38	648.345	677.687
BML-LCMS18-32.84-350.2815		0	0	0	0	0	1932.76	23576.2	62164.8	117054	4256.06	0	0	0	0	0	0	0	0	0	0	82068.7	86668.4	50009	54708.8	51501.9
BML-LCMS18-32.85-779.549		0	0	0	0	0	0	0	0	0	0	0	0	0	0	0	120441	104475	99753.1	113284	152681	0	0	0	0	0
BML-LCMS18-32.8-600.4188		0	0	0	0	0	14762.2	15453.3	17846.8	22268.9	14153.4	200518	143436	56757.4	74478.1	61510.9	0	0	0	0	0	30384.4	28611.6	27924.4	23661.7	20837.2
BML-LCMS18-32.87-739.5561		0	0	0	0	0	0	0	0	0	0	0	0	0	0	0	219871	221195	212543	224939	316593	0	0	0	0	0
BML-LCMS18-32.97-756.4011		0	0	0	0	0	142939	291086	159177	97567.2	243297	0	0	0	0	0	0	0	0	0	0	0	0	0	0	0
BML-LCMS18-33.23-348.2606		0	0	0	0	0	0	0	0	0	0	13485.8	30445.5	358033	1.71655e+06	1.96604e+06	8574.01	18854.1	15423	8285.76	11476.8	8795.95	8843.09	7355.06	5061.56	5471.33
BML-LCMS18-33.24-552.3067		0	0	0	0	0	0	0	0	0	0	19308.3	38157.9	326976	1.52859e+06	1.73032e+06	5893.98	18845.5	11357.3	5999.55	9522.07	18309.2	18319.5	17991.1	13611.7	18711.2
BML-LCMS18-33.39-398.3527		0	0	0	0	0	0	0	0	0	0	0	0	0	0	0	148830	103918	108906	143354	144243	0	0	0	0	0
BML-LCMS18-33.73-622.2794		0	0	0	0	0	0	0	0	0	0	14098.3	56233.3	449136	350175	391394	0	0	0	0	0	0	0	0	0	0
BML-LCMS18-34.17-412.3671		0	0	0	0	0	0	0	0	0	0	0	0	0	0	0	286992	240824	247615	259417	302624	16151.8	18872.2	19404.5	16733.4	19699.8
BML-LCMS18-34.17-414.3488		0	0	0	0	0	0	0	0	0	0	0	0	0	0	0	233501	147914	150012	179730	204268	0	0	0	0	0
BML-LCMS18-34.2-318.2537		0	0	0	0	0	44115.5	92841.7	79294.9	25925.9	114670	0	0	0	0	0	0	0	0	0	0	0	0	0	0	0
BML-LCMS18-34.29-396.3379		0	0	0	0	0	0	0	0	0	0	0	0	0	0	0	103214	166224	175248	135780	182549	0	0	0	0	0
BML-LCMS18-34.3-432.3504		0	0	0	0	0	0	0	0	0	0	8523.39	24515.1	15865.7	15824.2	19844.4	210723	273781	311065	227598	305055	3662.97	4532.08	4326.47	6592.09	2765.6
BML-LCMS18-34.52-324.3011		0	0	0	0	0	0	0	0	0	0	0	0	0	0	0	140423	81686.5	75169.2	123961	139675	0	0	0	0	0
BML-LCMS18-34.76-466.3429		0	0	0	0	0	0	0	0	0	0	0	0	0	0	0	69801.3	79867.7	78499.5	78766.6	91127.7	0	0	0	0	0
BML-LCMS18-34.96-428.364		0	0	0	0	0	0	0	0	0	0	0	18226	13023.7	11387.4	19245.6	464808	260675	265978	348712	414775	25577.3	30148	25059.8	28353.2	40014.5
BML-LCMS18-35.03-410.3521		0	0	0	0	0	0	0	0	0	0	9436.12	15776.1	12061.4	15234.3	20296	180360	261740	262281	235759	313662	12673.5	16986.5	14941.7	12715.6	11540.9
BML-LCMS18-35.14-598.456		0	0	0	0	0	0	0	0	0	0	3687.03	48328.6	17742.5	19026	110868	137747	263828	300875	215460	271051	21814	26964.2	35823.7	24688.7	16611.7
BML-LCMS18-36.02-488.3803		0	0	0	0	0	0	0	0	0	0	0	0	0	0	0	54830.7	129474	166848	82525.8	112301	0	0	0	0	0
BML-LCMS18-36.11-434.3378		0	0	0	0	0	0	0	0	0	0	0	0	0	0	0	459378	154976	142871	416961	474085	0	0	0	0	0
BML-LCMS18-38.33-460.3505		0	0	0	0	0	85159.1	104528	108366	109041	115500	0	105568	55533.2	49208.2	27793.6	51389.3	80430.3	25228.1	53934.7	107742	37549.6	24431.5	9921.72	14608.9	17442.8
BML-LCMS18-38.37-428.3644		0	0	0	0	0	229542	304957	265372	255053	273367	18280.4	272305	139751	118018	68339.2	103342	169449	50762.6	92291.1	198334	67734.1	41216.6	23123.9	30200.4	32484
BML-LCMS18-38.37-444.357		0	0	0	0	0	97027.5	125052	112968	113953	116924	6060.17	113473	57138.3	46150	23256.7	37483	70265.1	20797.9	41180	88059.4	26217.5	17545.6	8407.62	14224.3	14497.8
BML-LCMS18-38.45-628.4709		0	0	0	0	0	5974.64	10734.5	6480.61	5195.58	7993.7	0	0	0	0	0	70895.8	116592	110805	98956.8	145349	6676.7	9153.94	11400.8	6436.68	8837.94
BML-LCMS18-6.71-514.1714		0	0	0	0	0	138406	339857	251608	179032	348835	2047.8	5702.33	4205.64	17476.5	9939.57	0	0	0	0	0	0	0	0	0	0
BML-LCMS18-7.48-474.1389		0	0	0	0	0	26942.4	38601.5	32300	32774.8	26892.5	135514	385542	340071	114996	74272	19376.5	28274.8	17417.8	23275.3	47109.1	90484.4	95549.6	67753.3	72642.9	72055.7
BML-LCMS18-7.50-362.0988		0	0	0	0	0	0	0	0	0	0	0	0	0	0	0	153799	138442	192380	236108	248247	0	0	0	0	0
BML-LCMS18-8.30-366.0957		0	0	0	0	0	0	0	0	0	0	0	0	9746.57	163375	197828	298595	424628	439999	499152	601274	0	0	0	0	0
BML-LCMS18-8.68-366.0948		0	0	0	0	0	0	0	0	0	0	0	0	0	21581.5	36690.1	528911	817067	896941	1.05791e+06	1.25945e+06	0	0	0	0	0
