# Supplementary material for: Assessing Chemical Diversity in Psilotum nudum (L.) Beauv., a Pantropical Whisk Fern That Has Lost Many of Its Fern-Like Characters
Source: Front Plant Sci. 2019 Jul 9;10:868. doi: 10.3389/fpls.2019.00868 (PMC6629931; doi:10.3389/fpls.2019.00868)
Supplement: TABLE S4 — NMR acquisition parameters. [file Table_4.XLSX]

## Sheet: SupplTable4
Supplementary Table 4. NMR acquisition parameters.
Parameter	Setting / Value
Instrument Type	Varian 400MR 400 MHz NMR
NMR Experiment Type	1D
Field Frequency Lock	Deuterium
NMR Solvent	Various (see Table 2 for details)
Standard Concentration	None
Spectrometer Frequency	400 MHz
NMR Tube Size	5 mm tube
NMR Probe	Varian One Probe, H-X-tunable, with autotuning
Shimming Method	Z-gradient shim
Pulse Sequences	1H-PRESAT
Solvent Suppression	PRESAT
Pulse Width (90 degree)	1H: 5.70 µs @60
Receiver Gain	1H: 60
Offset Frequency	1H: 480.6Hz
Chemical Shift Reference	solvent
Temperature	298K
Number of Scans	1H: 8
Acquisition Time	1H: 2.048 s
Spectral Width	1H: 8012.8
Number of Data Points	1H: 32,822
Real Data Points	1H: 32K
Line Broadening	1H: 0 Hz
Baseline Correction Method	Polynomial
Chemical Shift Reference	None
