# Supplementary material for: Assessing Chemical Diversity in Psilotum nudum (L.) Beauv., a Pantropical Whisk Fern That Has Lost Many of Its Fern-Like Characters
Source: Front Plant Sci. 2019 Jul 9;10:868. doi: 10.3389/fpls.2019.00868 (PMC6629931; doi:10.3389/fpls.2019.00868)
Supplement: TABLE S5 — Bioflavonoids and related metabolites for which new Spektraris spectral records were generated. [file Table_5.XLSX]

## Sheet: SupplTable 3
Supplementary Table 5. Bioflavonoids and related metabolites for which new Spektraris spectral records were generated.
Spektraris	Common Name	Reference
Record
371	3'-Hydroxypsilotin	Balza F., Muir A.D., and Towers G.H.N. (1985) 3'-hydroxypsilotin, a minor phenolic glycoside from Psilotum nudum. Phytochemistry 24(3), 529-531.
372	Psilotin	Achenbach H., Witzke J. (1981) Synthese von Psilotin und 6-Epipsilotin. Liebigs Ann. Chem, 2384-2391.
373	Psilotic acid	Achenbach H., Witzke J. (1981) Synthese von Psilotin und 6-Epipsilotin. Liebigs Ann. Chem, 2384-2391.
374	Amentoflavone	Geiger H., Seeger T., Hahn H., Zinsmeister H.D., Markhman K., Wong H. (1993)1H NMR assignments in biflavonoid spectra by proton-detected C-H correlation Arbeitskreis Chemie aund Biologie der Moose 73.
375	Robustaflavone	Geiger H., Seeger T., Hahn H., Zinsmeister H.D., Markhman K., Wong H. (1993)1H NMR assignments in biflavonoid spectra by proton-detected C-H correlation Arbeitskreis Chemie aund Biologie der Moose 73.
376	5`-Hydroxyamentoflavone	Geiger H., Seeger T., Hahn H., Zinsmeister H.D., Markhman K., Wong H. (1993)1H NMR assignments in biflavonoid spectra by proton-detected C-H correlation Arbeitskreis Chemie aund Biologie der Moose 73.
377	5'3'''-Dihydroxyamentoflavone	Geiger H., Seeger T., Hahn H., Zinsmeister H.D., Markhman K., Wong H. (1993)1H NMR assignments in biflavonoid spectra by proton-detected C-H correlation Arbeitskreis Chemie aund Biologie der Moose 73.
378	5'-Hydroxyrobustaflavone	Geiger H., Seeger T., Hahn H., Zinsmeister H.D., Markhman K., Wong H. (1993)1H NMR assignments in biflavonoid spectra by proton-detected C-H correlation Arbeitskreis, Chemie aund Biologie der Moose 73. Seeger, T., Zinsmeister H.D., Geiger,H., (1990) The Biflavonoid pattern of Rhytidiadelphus squarrosus (Hedw.) Warnst, Z. Naturforsch. 45c, 583-586
379	5',3"-Dihydroxyrobustaflavone	Geiger H., Seeger T., Hahn H., Zinsmeister H.D., Markhman K., Wong H. (1993)1H NMR assignments in biflavonoid spectra by proton-detected C-H correlation Arbeitskreis Chemie aund Biologie der Moose 73.
380	Hinokiflavone	Geiger H., Seeger T., Hahn H., Zinsmeister H.D., Markhman K., Wong H. (1993)1H NMR assignments in biflavonoid spectra by proton-detected C-H correlation Arbeitskreis Chemie aund Biologie der Moose 73.
381	3',3'''-Biapigenin	Geiger H., Seeger T., Hahn H., Zinsmeister H.D., Markhman K., Wong H. (1993)1H NMR assignments in biflavonoid spectra by proton-detected C-H correlation Arbeitskreis Chemie aund Biologie der Moose 73.
382	3',3'''-Binaringenin	Seeger T., Geiger H., Zinsmeister H.D., Frahm J.-P., Witte L. (1992) 3`,3```-binaringenin, a new biflavonoid from Pilotrichella cuspidata (meteoriaceae, Musci). Z. Naturforsch. 47c, 667-669.
383	Isochamaejasmine	Niwa M., Otsuji S., Tatematsu H., Liu G.-Q., Chen X.-F., Hirata Y. (1986) Stereostructures of two biflavanones from Strellera chamaejasme L.Chem.Pharm.Bull. 34, 3249-3251.
384	Chamaejasmine	Niwa M., Otsuji S., Tatematsu H., Liu G.-Q., Chen X.-F., Hirata Y. (1986) Stereostructures of two biflavanones from Strellera chamaejasme L. Chem.Pharm.Bull. 34, 3249-3251.
400	5',3'''-Dihydroxyrobustaflavone	Seeger, T., Zinsmeister, H., Geiger, H. (1990). The Biflavonoid Pattern of Rhytidiadelphus squarrosus (Hedw.) Warnst. Z. Naturforsch. 45c, 583-586.
401	Dicranolomin	Rampendahl, C., Seeger, T., Geiger, H., Zinsmeister, H. (1996). The Biflavonoids of Plagiomnium undulatum. Phytochemistry 41, 1621-1624.
402	Philonotisflavone	Geiger, H., Seeger, T., Hahn, H., Zinsmeister, D., Markham, K., Wong, H. (1993). 1H NMR Assignments in Biflavonoid Spectra by Proton-Detected C-H Correlation. Z. Naturforsch. 48c, 821-826.
403	Anhydrobartramiaflavone	Seeger, T., Geiger, H., Zinsmeister, H. (1991). Bartramiaflavone, A Macrocyclic Biflavonoid from the Moss Bartramia pomiformis. Phytochemistry 30, 1653-1656.
404	Agathisflavone-7,7"-dimethylether	Geiger, H., Seeger, T., Hahn, H., Zinsmeister, D., Markham, K., Wong, H. (1993). 1H NMR Assignments in Biflavonoid Spectra by Proton-Detected C-H Correlation. Z. Naturforsch. 48c, 821-826.
405	Cupressuflavone-7,7"-dimethylether	Geiger, H., Seeger, T., Hahn, H., Zinsmeister, D., Markham, K., Wong, H. (1993). 1H NMR Assignments in Biflavonoid Spectra by Proton-Detected C-H Correlation. Z. Naturforsch. 48c, 821-826.
406	Aulacomniumbiaureusidin	Hahn, H., Seeger, T., Geiger, H., Zinsmeister, H., Markham, K., Wong, H. (1995). The First Biaurone, a Triflavone and Biflavonoids from Two Aulacomnium Species. Phytochemistry 40, 573-576.
407	Campylopusaurone	Geiger, H., Markham, K. (1992). Campylopusaurone, An Auronoflavanone Biflavonoid from the Mosses Campylopus clavatus and Campylopus holomitrium. Phytochemistry 31, 4325-4328.
408	Bilobetin	Ryu, Y., Jeong, H., Kim, J., Kim, Y., Park, J., Kim, D., Naguyen, T., Park, S., Chang, J., Park, K., Rho, M., Lee, W. (2010). Biflavonoids from Torreya nucifera displaying SARS-CoV 3CLpro inhibition. Bioorg. Med. Chem. 18, 7940-7947.
409	Podocarpusflavone A	Yeh, P., Shieh, Y., Hsu, L., Kuo, L., Lin, J., Liaw, C., Kuo, Y. (2012). Naturally Occurring Cytotoxic [3' → 8"]-Biflavonoids from Podocarpus nakaii. J. Tradit. Complement Med. 2, 220-226.
410	Isoginkgetin	Markham, K., Sheppard, C., Geiger, H. (1987) . 13C NMR Studies of some naturally occurring Amentoflavone and Hinokiflavone Biflavonoids.Phytochemistry 26, 3335-3337.
412	Tetramethylamentoflavone	Li, S., Zhao, M., Li, Y., Sui, Y., Yao, H., Huang, L., Lin, X. (2014). Preparative Isolation of six Anti-Tumour Biflavonoids from Selaginella Doederleinii Hieron by High-Speed Counter-Current Chromatography. Phytochem. Anal. 25, 127-133.; Markham, K., Sheppard, C., Geiger, H. (1987) . 13C NMR Studies of some naturally occurring Amentoflavone and Hinokiflavone Biflavonoids. Phytochemistry 26, 3335…
415	Cryptomerin A	Markham, K., Sheppard, C., Geiger, H. (1987). 13C NMR Studies of some naturally occurring Amentoflavone and Hinokiflavone Biflavonoids. Phytochemistry 26, 3335-3337.
417	Isocryptomerin	Markham, K., Sheppard, C., Geiger, H. (1987). 13C NMR Studies of some naturally occurring Amentoflavone and Hinokiflavone Biflavonoids. Phytochemistry 26, 3335-3337.
418	2,3-Dihydrohinokiflavone	Markham, K., Sheppard, C., Geiger, H. (1987). 13C NMR Studies of some naturally occurring Amentoflavone and Hinokiflavone Biflavonoids. Phytochemistry 26, 3335-3337.
422	Hexa-O-methylcupressuflavone	Chari, V., Ilyas, M., Hildebert, W., Neszmelyi, A., Chen, F., Chen, L., Lin, Y., Lin, Y. (1977). 13C-NMR Spectroscopy of Biflavanoids. Phytochemistry 16, 1273-1278.
424	Agathisflavone	Chari, V., Ilyas, M., Hildebert, W., Neszmelyi, A., Chen, F., Chen, L., Lin, Y., Lin, Y. (1977). 13C-NMR Spectroscopy of Biflavanoids. Phytochemistry 16, 1273-1278.
427	Succedaneaflavanone	Chari, V., Ilyas, M., Hildebert, W., Neszmelyi, A., Chen, F., Chen, L., Lin, Y., Lin, Y. (1977). 13C-NMR Spectroscopy of Biflavanoids. Phytochemistry 16, 1273-1278.
429	trimethoxy lophirone A	Abdullahi, M., Musa, A., Haruna, A., Pateh, U., Sule, I., Abdulmalik, I., Abdullahi, M., Abimiku, A., Illiya, I. (2014) Isolation and characterization of an anti-microbial biflavonoid from the chloroform-soluble fraction of methanolic root extract of Ochna schweinfurthiana (Ochnaceae). Afr. J. Pharm. Pharmacol. 8, 93-99.
430	3-O-7"-Biluteolin	Ali, D., Wong, K., Lim, P. (2005) Flavonoids from Blumea balsamifera. Fitoterapia 76, 128-130.
436	Chamaeflavone A	Asada, Y., Sukemori, A., Watanabe, T., Malla, K., Yoshikawa, T., Li, W., Kuange, X., Koike, K., Chen, C., Akiyama, T., Qian, K., Nakagawa-Goto, K., Morris-Natschke, S., Lu, Y., Lee, K. (2013) J. Nat. Prod. 76, 852-857.
437	Daphnodorin C	Baba, K., Takeuchi, K., Mitsunobu, D., Kozawa, M. (1986) The Revised Structure of Daphnodorin C, a Novel Spiro Biflavonoid. Chem. Pharm. Bull. 34, 2680-2683. Babue, K., Takeuchi, K., Doi, M., Kozawa, M. (1987). Chemical Studies on the Constituents of the Thymelaeaceous Plants III. Structure of a Novel Sprio Biflavonoid, Daphnodorin C from Daphne odora Thunb. Chem. Pharm. Bull. 35, 1853-1859.
439	Spiro[benzofuran-​2(3H)​,​9'(8'H)​-​[2H]​furo[2,​3-​h]​[1]​benzopyran]​-​3-​ol, 3',​4'-​dihydro-​4,​5',​6-​trimethoxy-​2',​8'-​bis(4-​methoxyphenyl)​-​, [2'S-​[2'α,​8'β, 9'β(R*)​]​]​- (9CI)	Baba, K., Takeuchi, K., Mitsunobu, D., Kozawa, M. (1986) The Revised Structure of Daphnodorin C, a Novel Spiro Biflavonoid. Chem. Pharm. Bull. 34, 2680-2683. Babue, K., Takeuchi, K., Doi, M., Kozawa, M. (1987). Chemical Studies on the Constituents of the Thymelaeaceous Plants III. Structure of a Novel Sprio Biflavonoid, Daphnodorin C from Daphne odora Thunb. Chem. Pharm. Bull. 35, 1853-1859.
440	Genkwanol B	Baba, K., Taniguchi, M., Kozawa, M. (1992) A Spirobiflavonoid Genkwanol B from Daphne Genkwa. Phytochemistry 31, 975-980.; Baba, K., Taniguchi, M., Ohishi, H., Kozawa, M. (1993). Stereochemistry of the Spirobiflavonoid Genkwanol B From Daphne genkwa. Phytochemistry 32, 221-223.; Baba, K., Taniguchi, M., Kozawa, M. (1993). A Third Spirobiflavonoid Genkwanol C From Daphne genkwa. Phytochemistry 33,…
441	Genkwanol B pentamethyl ether	Baba, K., Taniguchi, M., Kozawa, M. (1992) A Spirobiflavonoid Genkwanol B from Daphne Genkwa. Phytochemistry 31, 975-980.
442	Genkwanol hexamethyl ether	Baba, K., Taniguchi, M., Kozawa, M. (1992) A Spirobiflavonoid Genkwanol B from Daphne Genkwa. Phytochemistry 31, 975-980.
443	3,3',5,7-Tetramethoxy-2'-(4-methoxyphenyl)-3',4'-dihydro-2'H,7'H-spiro[chromane-2,8'-chromene]-4,7'-dione	Baba, K., Taniguchi, M., Kozawa, M. (1992) A Spirobiflavonoid Genkwanol B from Daphne Genkwa. Phytochemistry 31, 975-980.
444	(2S,3S,8S,8aR,14aS)-6a-Hydroxy-3,8a,10,12-tetramethoxy-2,8-bis(4-methoxyphenyl)-3,4,8,8a-tetrahydro-2H,6aH,9H-furo[3,4-b:2,3-h']dichromen-9-one	Baba, K., Taniguchi, M., Kozawa, M. (1992) A Spirobiflavonoid Genkwanol B from Daphne Genkwa. Phytochemistry 31, 975-980.
445	(2S,3S,8S,8aR,14aS)-3,6a,8a,10,12-Pentamethoxy-2,8-bis(4-methoxyphenyl)-3,4,8,8a-tetrahydro-2H,6aH,9H-furo[3,4-b:2,3-h']dichromen-9-one	Baba, K., Taniguchi, M., Kozawa, M. (1992) A Spirobiflavonoid Genkwanol B from Daphne Genkwa. Phytochemistry 31, 975-980.
446	1H,5H,12H-Furo[3,4-b:2,3-h']bis[1]benzopyran-5-one, 4,4a,13,14-tetrahydro-1,4a,6,8,13-pentamethoxy-4,12-bis(4-methoxyphenyl)- (9CI)	Baba, K., Taniguchi, M., Kozawa, M. (1992) A Spirobiflavonoid Genkwanol B from Daphne Genkwa. Phytochemistry 31, 975-980.
447	2,3-Dihydroamentoflavone	Zhang, Y., Shi, S., Wang, Y., Huang, K. (2011). Target-guided isolation and purification of antioxidants from Selaginella sinensis by offline coupling of DPPH-HPLC and HSCCC experiments. J. Chromatogr. B 879, 191-196.; Guodong, Z. (2006). Natural Products from Selaginella. M.S. Dissertation, National University of Singapore.; Anhut, S., Seeger, T., Zinsmeister, H., Geiger, H. (1989). New Dihydrob…
448	4'-O-Methyl-robustaflavone	Zhang, Y., Shi, S., Wang, Y., Huang, K. (2011). Target-guided isolation and purification of antioxidants from Selaginella sinensis by offline coupling of DPPH-HPLC and HSCCC experiments. J. Chromatogr. B 879, 191-196.; Lin, L., Kuo, Y., Chou, C. (2000). Cytotoxic Biflavonoids from Selaginella delicatula. J. Nat. Prod. 63, 627-630.
449	Ginkgetin	Zhang, Y., Shi, S., Wang, Y., Huang, K. (2011). Target-guided isolation and purification of antioxidants from Selaginella sinensis by offline coupling of DPPH-HPLC and HSCCC experiments. J. Chromatogr. B 879, 191-196.; Ryu, Y., Jeong, H., Kim, J., Kim, Y., Park, J., Kim, D., Naguyen, T., Park, S., Chang, J., Park, K., Rho, M., Lee, W. (2010). Biflavonoids from Torreya nucifera displaying SARS-CoV…
450	Caesalpinioflavone	Zanin, J., Massoni, M., dos Santos, M., de Freitas, G., Niero, E., Schefer, R., Lago, J., Ionta, M., Soares, M. (2015). Caesalpinioflavone, a New Cytotoxic Biflavonoid Isolated from Caesalpinia pluviosa var. peltophoroides. J. Braz. Chem. Soc. 26, 804-809.
451	Isoneochamaejasmin A	Yu, L., Pu, J., Zuo, M., Zhang, X., Cao, Y., Chen, S., Lou, Y., Zhou, Q., Hu, H., Jiang, H., Chen, J., Zeng, S. (2014). Hepatic Glucuronidation of Isoneochamaejasmin A from the Traditional Chinese Medicine Stellera Chamaejasme L. Root. Drug Metab. Dispos. 42, 735-743.
453	Podocarpusflavone B	Yeh, P., Shieh, Y., Hsu, L., Kuo, L., Lin, J., Liaw, C., Kuo, Y. (2012). Naturally Occurring Cytotoxic [3' → 8"]-Biflavonoids from Podocarpus nakaii. J. Tradit. Complement Med. 2, 220-226.
454	Heveaflavone	Yeh, P., Shieh, Y., Hsu, L., Kuo, L., Lin, J., Liaw, C., Kuo, Y. (2012). Naturally Occurring Cytotoxic [3' → 8"]-Biflavonoids from Podocarpus nakaii. J. Tradit. Complement Med. 2, 220-226.; Li, S., Zhao, M., Li, Y., Sui, Y., Yao, H., Huang, L., Lin, X. (2014). Preparative Isolation of six Anti-Tumour Biflavonoids from Selaginella Doederleinii Hieron by High-Speed Counter-Current Chromatography. P…
455	Morelloflavone	Ayundawati, F., Ersam, T. (2015). Isolasi Senyawa Biflavonoid dari Kaya Akar Garcinia tetranda. Jurnal Sains Dan Seni Its 4, C-90-C94.; Jamila, N., Khairuddean, M., Khan, S., Khan, N. (2014). Complete NMR assignments of bioactive rotameric (3→8) biflavonoids from the bark of Garcinia hombroniana. Magn. Reson. Chem. 52, 345-352.
456	Hexa-O-methylamentoflavone	Yamaguchi, L., Vassao, D., Kato, M., Mascio, P. (2005). Biflavonoids from Brazilian pine Araucaria angustifolia as potentials protective agents against DNA damage and lipoperoxidation. Phytochemistry 66, 2238-2247.; Guodong, Z. (2006). Natural Products from Selaginella. M.S. Dissertation, National University of Singapore.
457	2,2'-Bis(4-hydroxyphenyl)-7,7'-dimethyl-3-((2R,3R,4R,5S,6R)-3,4,5-trihydroxy-6-(hydroxymethyl)tetrahydro-2H-pyran-2-yl)-3'-((2S,3R,4R,5R,6S)-3,4,5-trihydroxy-6-Methyltetrahydro-2H-pyran-2-yl)-4H,4'H-[5,5'-bichromene]-4,4'-dione	Yadav, S., Bhadoria, B. (2005). Two dimeric flavonoids from Bauhinia purpurea. Indian J. Chem. 44B, 2604-2607.
458	8,8'-bis(7,8-dihydroxy-2-methyl-2H-chromen-5-yl)-4,4'-dimethoxy-6H,6'H-[5,5'-bifuro[3,2-h]chromene]-6,6'-dione	Yadav, S., Bhadoria, B. (2005). Two dimeric flavonoids from Bauhinia purpurea. Indian J. Chem. 44B, 2604-2607.
459	Sarcandrone C	Cao, C., Xu, L., Peng, Y., Shi, Q., Xiao, P. (2010). Two New Flavan-Flavanones from Sarcandra hainanensis. Chem. Pharm. Bull. 58, 1395-1398.
460	Sarcandrone D	Cao, C., Xu, L., Peng, Y., Shi, Q., Xiao, P. (2010). Two New Flavan-Flavanones from Sarcandra hainanensis. Chem. Pharm. Bull. 58, 1395-1398.
461	Chimarrhoside	Cardoso, C., Silva, D., Castro-Gamboa, I., Bolzani, V. (2005). New Biflavonoid and Other Flavonoids from the Leaves of Chimarrhis turbinata and their Antioxidant Activities. J. Braz. Chem. Soc. 16, 1353-1359.
462	(2R*,3R*,2’’R*,3’’R*)-7-Hydroxy-4’-methoxy-(3→3’’)-3’’’,7’’-dihydroxy-4’’’-methoxy-flavanone	Cardoso, M., Lima, L., David, J., Moreira, B., Santos, E., David, J., Alves, C. (2015). A New Biflavonoid from Schinopsis brasiliensis (Anacardiacae). J. Braz. Chem. Soc. 26, 1527-1531.
463	4,2',4'-Trihydroxychalcone-(3→O→4'')- 2''',4'''-dihydroxychalcone	Cardoso, M., Lima, L., David, J., Moreira, B., Santos, E., David, J., Alves, C. (2015). A New Biflavonoid from Schinopsis brasiliensis (Anacardiacae). J. Braz. Chem. Soc. 26, 1527-1531.
464	4′,4‴,7,7″-Tetra-O-methylcupressuflavone	DeForest, J., Du, L., Joyner, P. (2014). 4',4''',7,7''-Tetra-O-methylcupressuflavone Inhibits Seed Germination of Lactuca sativa. J. Nat. Prod. 77, 1093-1096.
465	Garciniaflavone A	Ito, T., Yokota, R., Watarai, T., Mori, K., Oyama, M., Nagasawa, H., Matsuda, H., Iinuma, M. (2013). Isolation of Six Isoprenylated Biflavonoids from the Leaves of Garcinia subelliptica. Chem Pharm. Bull. 61, 551-558.
466	Garciniaflavone B	Ito, T., Yokota, R., Watarai, T., Mori, K., Oyama, M., Nagasawa, H., Matsuda, H., Iinuma, M. (2013). Isolation of Six Isoprenylated Biflavonoids from the Leaves of Garcinia subelliptica. Chem Pharm. Bull. 61, 551-558.
467	Garciniaflavone C	Ito, T., Yokota, R., Watarai, T., Mori, K., Oyama, M., Nagasawa, H., Matsuda, H., Iinuma, M. (2013). Isolation of Six Isoprenylated Biflavonoids from the Leaves of Garcinia subelliptica. Chem Pharm. Bull. 61, 551-558.
468	Garciniaflavone D	Ito, T., Yokota, R., Watarai, T., Mori, K., Oyama, M., Nagasawa, H., Matsuda, H., Iinuma, M. (2013). Isolation of Six Isoprenylated Biflavonoids from the Leaves of Garcinia subelliptica. Chem Pharm. Bull. 61, 551-558.
469	Garciniaflavone E	Ito, T., Yokota, R., Watarai, T., Mori, K., Oyama, M., Nagasawa, H., Matsuda, H., Iinuma, M. (2013). Isolation of Six Isoprenylated Biflavonoids from the Leaves of Garcinia subelliptica. Chem Pharm. Bull. 61, 551-558.
470	Garciniaflavone F	Ito, T., Yokota, R., Watarai, T., Mori, K., Oyama, M., Nagasawa, H., Matsuda, H., Iinuma, M. (2013). Isolation of Six Isoprenylated Biflavonoids from the Leaves of Garcinia subelliptica. Chem Pharm. Bull. 61, 551-558.
471	Pancibiflavonol	Ito, C., Itoigawa, M., Miyamoto, Y., Rao, S., Takayasu, J., Okuda, Y., Mukainaka, T., Tokuda, H., Nishino, H., Furukawa, H. (1999). A New Biflavonoid from Calophyllum panciflorum with Antitumor-Promoting Activity. J. Nat. Prod. 62, 1668-1671.
472	4''',5,5'',7''-Tetrahydroxy-3''',4',7-trimethoxy-3,6''-biflavone	Carneiro, F., Boralle, N., Silva, D., Lopes, L. (2000). Bi- and tetraflavonoids from Aristolochia ridicula. Phytochemistry 55, 823-832.
473	Ridiculuflavone C	Carneiro, F., Boralle, N., Silva, D., Lopes, L. (2000). Bi- and tetraflavonoids from Aristolochia ridicula. Phytochemistry 55, 823-832.
474	4''',5,5'',7''-Tetrahydroxy-3'',3''',4'-trimethoxy-6-O-α,7-β,flavone-chalcone	Carneiro, F., Boralle, N., Silva, D., Lopes, L. (2000). Bi- and tetraflavonoids from Aristolochia ridicula. Phytochemistry 55, 823-832.
476	3''',5,5'',7''-Tetrahydroxy-3'',4',4'''-trimethoxy-6-O-α,7-β-flavone-chalcone	Carneiro, F., Boralle, N., Silva, D., Lopes, L. (2000). Bi- and tetraflavonoids from Aristolochia ridicula. Phytochemistry 55, 823-832.
477	4',5,5'',7''-Tetrahydroxy-3',3'',4'''-trihydroxy-6-O-β,7-α-flavone-chalcone	Carneiro, F., Boralle, N., Silva, D., Lopes, L. (2000). Bi- and tetraflavonoids from Aristolochia ridicula. Phytochemistry 55, 823-832.
478	5,5''-Diacetyl-7,4',7''-trimethyl-2'',3''-dihydroochnaflavone	de Carvalho, M., Silva, V., da Rocha, J. (2009). A new derivative of dihydroochnaflavone isolated from Luxemburgia species (Ochnaceae) and the complete 1H and 13C NMR chemical shifts assignments. Brazilian Journal of Pharmacognosy 19, 33-35.
479	Luxenchalcone	de Carvalho, M., Alves, C., da Silva, K., Eberlin, M., Werle, A. (2004). Luxenchalcone, a New Bichalcone and other Constituents from Luxemburgia octandra. J. Braz. Chem. Soc. 15, 146-149.
480	4-4'-Dimethoxy-2'-hydroxychalcone-3→O→4")-2'"-hydroxy-4'"-methoxychalcone (luxenchalconetrimethylether)	de Carvalho, M., Alves, C., da Silva, K., Eberlin, M., Werle, A. (2004). Luxenchalcone, a New Bichalcone and other Constituents from Luxemburgia octandra. J. Braz. Chem. Soc. 15, 146-149.
481	Wikstaiwanone A	Chen, L., Chen, I., Peng, C. (2012). Structural Elucidation and Bioactivity of Biflavonoids from the Stems of Wikstroemia taiwanensis. Int. J. Mol. Sci. 13, 1029-1038.
482	Wikstaiwanone B	Chen, L., Chen, I., Peng, C. (2012). Structural Elucidation and Bioactivity of Biflavonoids from the Stems of Wikstroemia taiwanensis. Int. J. Mol. Sci. 13, 1029-1038.
483	Wikstaiwanone C	Chen, L., Chen, I., Peng, C. (2012). Structural Elucidation and Bioactivity of Biflavonoids from the Stems of Wikstroemia taiwanensis. Int. J. Mol. Sci. 13, 1029-1038.
484	Gnidia biflavonoid 4 (GB-4)	Ferrari, J., Terreaux, C., Kurtain, T., Szikszai-Kiss, A., Antus, S., Msonthi, J., Hostettmann, K. (2003). Isolation and On-Line LC/CD Analysis of 3,8"-Linked Biflavonoids from Gnidia involucrata. Helv. Chim. Acta 86, 2768-2778.
485	Gnidia biflavonoid 4a (GB-4a)	Ferrari, J., Terreaux, C., Kurtain, T., Szikszai-Kiss, A., Antus, S., Msonthi, J., Hostettmann, K. (2003). Isolation and On-Line LC/CD Analysis of 3,8"-Linked Biflavonoids from Gnidia involucrata. Helv. Chim. Acta 86, 2768-2778.
486	(2''S)-2′′,3′′-dihydrohinokiflavone	Das, B., Mahender, G., Rao, Y., Thirupathi, P. (2006). A new biflavonoid from Cycas beddomei. Indian J. Chem. 45B, 1933-1935.
487	Ericoside	Bitchagno, G., Tankeo, S., Tsopmo, A., Mpetga, S., Tchinda, A., Fobofou, S., Nkuete, A., Wessjohann, L., Kuete, V., Tane, P. (2016). Ericoside, a new antibacterial biflavonoid from Erica mannii (Ericaceae). Fitoterapia 109, 206-211.
488	myricetin-3-O-α-L-rhamnoside(C7 I-O-C7 II)myricetin-3-O-α-L-rhamnoside	Gedara, S., Galala, A. (2014). New cytotoxic spirostane saponin and biflavonoid glycoside from the leaves of Acacia saligna (Labill.) H.L. Wend. Nat. Prod. Res. 28, 324-329.
489	Lophirone A	Ghogomu, R., Sondengam, B., Martin, M., Bodo, B. (1987). Lophirone A, A Biflavonoid with Unusual Skeleton from Lophira Lanceolata. Tetrahedron Lett. 28, 2967-2968.; Messanga, B., Tih, R., Kimbu, S., Sondengam, B. (1992). Calocdenone, A New Isobiflavonoid From Ochna calodendron. J. Nat. Prod. 55, 245-248.
490	Lophirone A tetramethyl ether	Ghogomu, R., Sondengam, B., Martin, M., Bodo, B. (1987). Lophirone A, A Biflavonoid with Unusual Skeleton from Lophira Lanceolata. Tetrahedron Lett. 28, 2967-2968.
494	Aulacomniumtriluteolin	Hahn, H., Seeger, T., Geiger, H., Zinsmeister, H., Markham, K., Wong, H. (1995). The First Biaurone, a Triflavone and Biflavonoids from Two Aulacomnium Species. Phytochemistry 40, 573-576.
495	3'',4',4''',5,5'',7,7''-Heptahydroxy-3,8''-biflavanone	Han, Q., Lee, S., Qiao, C., He, Z., Song, J., Sun, H., Xu, H. (2005). Complete NMR Assignments of the Antibacterial Biflavonoid GB1 from Garcinia kola. Chem. Pharm. Bull. 53, 1034-1036.
496	4'-Methoxydaphnodorin E	Huang, W., Zhou, G., Wang, G., Chung, H., Ye, W., Li, Y. (2012). A new biflavonoid with antiviral activity from the roots of Wikstroemia indica. J. Asian Nat. Prod. Res. 14, 401-406.
497	Crassifolin	Gomez-Garibay, F., Calderon, J., De La O Arciniega, M., Cespedes, C., Tellez-Valdes, O., Taboada, J. (1999). An unusual isopropenyldihydrofuran biflavanol from Tephrosia crassifolia. Phytochemistry 52, 1159-1163.
498	2H-​Furo[2,​3-​h]​-​1-​benzopyran, 8,​9-​dihydro-​5-​methoxy-​8-​(1-​methylethenyl)​-​2-​phenyl-​3-​[2,​3,​ 7,​8-​tetrahydro-​4-​methoxy-​7-​(1-​methylethenyl)​-​2-​(phenylmethyl)​ benzo[1,​2-​b:3,​4-​b']​difuran-​3-​yl]​- (9CI)	Gomez-Garibay, F., Calderon, J., De La O Arciniega, M., Cespedes, C., Tellez-Valdes, O., Taboada, J. (1999). An unusual isopropenyldihydrofuran biflavanol from Tephrosia crassifolia. Phytochemistry 52, 1159-1163.
499	Robustaflavone 7,4',4'''-trimethyl ether	Chen, J., Duh, C., Chen, J. (2005). New Cytotoxic Biflavonoids from Selaginella delicatula. Planta Med. 71, 659-665.
500	Robustaflavone 4',4'''-dimethyl ether	Chen, J., Duh, C., Chen, J. (2005). New Cytotoxic Biflavonoids from Selaginella delicatula. Planta Med. 71, 659-665.
501	(2S)-2,3-Dihydroamentoflavone 7,4',7"-trimethyl ether	Chen, J., Duh, C., Chen, J. (2005). New Cytotoxic Biflavonoids from Selaginella delicatula. Planta Med. 71, 659-665.
502	(2S)-2,3-Dihydroamentoflavone 7,4'-dimethyl ether	Chen, J., Duh, C., Chen, J. (2005). New Cytotoxic Biflavonoids from Selaginella delicatula. Planta Med. 71, 659-665.
503	(2''S)-2",3"-Dihydroisocryptomerin 7-methyl ether	Chen, J., Duh, C., Chen, J. (2005). New Cytotoxic Biflavonoids from Selaginella delicatula. Planta Med. 71, 659-665.
504	Ouratine A	Mbing, J., Enguehard-Gueiffier, C., de Theodore Atchade, A., Allouchi, H., Gangoue-Pieboji, J., Mbafor, J., Tih, R., Pothier, J., Pegnyemb, D., Gueiffier, A. (2006). Two biflavonoids from Ouratea nigroviolacea. Phytochemistry 67, 2666-2670.
505	Ouratine A tetraacetate	Mbing, J., Enguehard-Gueiffier, C., de Theodore Atchade, A., Allouchi, H., Gangoue-Pieboji, J., Mbafor, J., Tih, R., Pothier, J., Pegnyemb, D., Gueiffier, A. (2006). Two biflavonoids from Ouratea nigroviolacea. Phytochemistry 67, 2666-2670.
506	Ouratine B	Mbing, J., Enguehard-Gueiffier, C., de Theodore Atchade, A., Allouchi, H., Gangoue-Pieboji, J., Mbafor, J., Tih, R., Pothier, J., Pegnyemb, D., Gueiffier, A. (2006). Two biflavonoids from Ouratea nigroviolacea. Phytochemistry 67, 2666-2670.
507	Protoapigenone-(8-3")-apigenin	Hunyadi, A., Chuang, D., Danko, B., Chiang, M., Lee, C., Wang, H., Wu, C., Chang, F., Wu, Y. (2011). Direct Semi-Synthesis of the Anticancer Lead-Drug Protoapigenone from Apigenin, and Synthesis of Further New Cytotoxic Protoflavone Derivatives. PLoS ONE 6, e23922.
508	5',5'-Bisdihydroquercetin	Foo, L., Helm, R., Karchessy, J. (1992). [5',5']-Bisdihydroquercetin: A B-Ring Linked Biflavonoid from Pseudotsuga Menziesii. Phytochemistry 31, 1444-1445.
509	[5',5']-Bisdihydroquercetin decaacetate	Foo, L., Helm, R., Karchessy, J. (1992). [5',5']-Bisdihydroquercetin: A B-Ring Linked Biflavonoid from Pseudotsuga Menziesii. Phytochemistry 31, 1444-1445.
510	Baeckein E	Jia, B., Ren, F., Jia, L., Chen, X., Yang, J., Wang, Q. (2013). Baeckein E, a new bioactive C-methylated biflavonoid from the roots of Baeckea frutescens. Nat. Prod. Res. 27, 2069-2075.
511	Baeckein C	Jia, B., Zhou, Y., Chen, X., Wang, X., Yang, J., Lai, M., Wang, Q. (2011). Structure determination of baeckeins C and D from the roots of Baeckea frutescens. Magn. Reson. Chem. 49, 757-761.
512	Baeckein D	Jia, B., Zhou, Y., Chen, X., Wang, X., Yang, J., Lai, M., Wang, Q. (2011). Structure determination of baeckeins C and D from the roots of Baeckea frutescens. Magn. Reson. Chem. 49, 757-761.
513	Baeckein A	Jia, B., Yang, J., Chen, X., Cao, Y., Lai, M., Wang, Q. (2011). Baeckeins A and B, Two Novel 6-Methylflavonoids from the Roots of Baeckea frutescens. Helv. Chim. Acta 94, 2283-2288.
514	Baeckein B	Jia, B., Yang, J., Chen, X., Cao, Y., Lai, M., Wang, Q. (2011). Baeckeins A and B, Two Novel 6-Methylflavonoids from the Roots of Baeckea frutescens. Helv. Chim. Acta 94, 2283-2288.
515	Baeckein F	Jia, B., Zeng, X., Ren, F., Jia, L., Chen, X., Yang, J., Liu, H., Wang, Q. (2014). Baeckeins F-I, four novel C-methylated biflavonoids from the roots of Baeckea frutescens and their anti-inflammatory activities. Food Chem. 155, 31-37.
516	Baeckein G	Jia, B., Zeng, X., Ren, F., Jia, L., Chen, X., Yang, J., Liu, H., Wang, Q. (2014). Baeckeins F-I, four novel C-methylated biflavonoids from the roots of Baeckea frutescens and their anti-inflammatory activities. Food Chem. 155, 31-37.
517	Baeckein H	Jia, B., Zeng, X., Ren, F., Jia, L., Chen, X., Yang, J., Liu, H., Wang, Q. (2014). Baeckeins F-I, four novel C-methylated biflavonoids from the roots of Baeckea frutescens and their anti-inflammatory activities. Food Chem. 155, 31-37.
518	Baeckein I	Jia, B., Zeng, X., Ren, F., Jia, L., Chen, X., Yang, J., Liu, H., Wang, Q. (2014). Baeckeins F-I, four novel C-methylated biflavonoids from the roots of Baeckea frutescens and their anti-inflammatory activities. Food Chem. 155, 31-37.
519	Cochinchinenin D	Dai, H., Wang, H., Liu, J., Wu, J., Mei, W. (2012). Two New Biflavonoids From The Stem of Dracaena cambodiana. Chem. Nat. Compd. 48, 376-378.
520	8-Methyl-4'-methoxysocotrin-3'-ol	Dai, H., Wang, H., Liu, J., Wu, J., Mei, W. (2012). Two New Biflavonoids From The Stem of Dracaena cambodiana. Chem. Nat. Compd. 48, 376-378.
521	3’,8’’-biisokaempferide	Pinto, M., da Silva, M., Schindler, E., Filho, J., El-Bacha, R., Castello-Branco, M., Agra, M., Tavares, J. (2010). 3',8"-Biisokaempferide, a Cytotoxic Biflavonoid and Other Chemical Constituents of Nanuza plicata (Velloziaceae). J. Braz. Chem. Soc. 21, 1819-1824.
522	P-phloridzin-(I-5, II-3')-phloretin-4-O-glucoside	Wang, S., Zhu, X., Wang, X., Shen, T., Xiang, F., Lou, H. (2013). Flavonoids from Malus hupehensis and their cardioprotective effects agains doxorubicin-induced toxicity in H9c2 cell. Phytochemistry 87, 119-125.
523	M-phloridzin-(I-5, II-3')-phloretin-4-O-glucoside	Wang, S., Zhu, X., Wang, X., Shen, T., Xiang, F., Lou, H. (2013). Flavonoids from Malus hupehensis and their cardioprotective effects agains doxorubicin-induced toxicity in H9c2 cell. Phytochemistry 87, 119-125.
524	Phloridzin-(I-4, O, II-2)-luteolin-5-O-glucoside	Wang, S., Zhu, X., Wang, X., Shen, T., Xiang, F., Lou, H. (2013). Flavonoids from Malus hupehensis and their cardioprotective effects agains doxorubicin-induced toxicity in H9c2 cell. Phytochemistry 87, 119-125.
525	Tepicanol A	Gomez-Garibay, F., Calderon, J., Quijano, L., Tellez, O., Olivares, M., Rios, T. (1997). An Unusual Prenyl Biflavanol From Tephrosia tepicana. Phytochemistry 46, 1285-1287.
526	4,6-Dimethoxy-7-prenyl-2,benzyl-benzofuran	Gomez-Garibay, F., Calderon, J., Quijano, L., Tellez, O., Olivares, M., Rios, T. (1997). An Unusual Prenyl Biflavanol From Tephrosia tepicana. Phytochemistry 46, 1285-1287.
527	2,3-Dihydroochnaflavone 7,4',7"-tri-O-methyl ether	Jayakrishna, G., Reddy, M., Jayaprakasam, B., Gunasekar, D., Blond, A., Bodo, B. (2003). A New Biflavonoid From Ochna beddomei. J. Asian Nat. Prod. Res. 5, 83-87.
528	Preussianone	Messi, B., Ndjoko-Ioset, K., Hertlein-Amslinger, B., Lannang, A., Nkengfack, A., Wolfender, J., Hostettmann, K., Bringman, G. (2012). Preussianone, a New Flavanone-Chromone Biflavonoid from Garcinia preussii Engl. Molecules 17, 6114-6125.
529	Buchananiflavanone	Messi, B., Ndjoko-Ioset, K., Hertlein-Amslinger, B., Lannang, A., Nkengfack, A., Wolfender, J., Hostettmann, K., Bringman, G. (2012). Preussianone, a New Flavanone-Chromone Biflavonoid from Garcinia preussii Engl. Molecules 17, 6114-6125.
530	Linobiflavonoid	Navarat, T., Pyne, S., Prawat, U., Tuntiwachwuttikul, P. (2011). Isolation of linobiflavonoid, a novel biflavonoid from Linostroma pauciflorum Griff. Phytochem. Lett. 4, 383-385.
531	Dulcisbiflavonoid A	Saelee, A., Phongpaichit, S., Mahabusarakam, W. (2015). A new prenylated biflavonoid from the leaves of Garcinia dulcis. Nat. Prod. Res. 29, 1884-1888.
532	Rhuschalcone VI	de Oliveira, J., David, J., David, J. (2016). Biflavonoids from the bark roots of Poincianella pyramidalis (Fabaceae). Phytochemistry 16, 18-22.
533	5-Hydroxy-7,4'-dimethoxyflavone-3a-2'''-hydroxy-4''',4''-dimethoxydihydrochalcone	de Oliveira, J., David, J., David, J. (2016). Biflavonoids from the bark roots of Poincianella pyramidalis (Fabaceae). Phytochemistry 16, 18-22.
534	5,7-Dihydroxy-4'-methoxyflavone-3α-2'''-hydroxy-4''',4"-dimethoxydihydrochalcone	de Oliveira, J., David, J., David, J. (2016). Biflavonoids from the bark roots of Poincianella pyramidalis (Fabaceae). Phytochemistry 16, 18-22.
535	7-Hydroxy-4'-methoxyflavone-3α-2'''',4''''-dihydroxy-4"-methoxydihydrochalcone	de Oliveira, J., David, J., David, J. (2016). Biflavonoids from the bark roots of Poincianella pyramidalis (Fabaceae). Phytochemistry 16, 18-22.
536	7,4'-Dihydroxy-flavanone-3,8-5",6",4"-trihydroxy-flavone	de Oliveira, J., David, J., David, J. (2016). Biflavonoids from the bark roots of Poincianella pyramidalis (Fabaceae). Phytochemistry 16, 18-22.
537	(I-2S)-I-5,II-5,I-7,II-7,I-2',II-2',I-5',II-5'-Octahydroxy-[I-6,II-6']-flavanonylflavone	Miyaichi, Y., Hanamitsu, E., Kizu, H., Tomimori, T. (2006). Studies on the Constituents of Scutellaria Species (XXII). Constituents of the Roots of Scutellaria amabilis HARA. Chem. Pharm. Bull 54, 435-441.
538	(I-2S)-I-5,II-5,I-7,II-7,I-2',II-2',II-5'-Heptahydroxy-[I-6,II-6']-flavanonylflavone	Miyaichi, Y., Hanamitsu, E., Kizu, H., Tomimori, T. (2006). Studies on the Constituents of Scutellaria Species (XXII). Constituents of the Roots of Scutellaria amabilis HARA. Chem. Pharm. Bull 54, 435-441.
539	Saiyutone A	Rittiwong, T., Mutarapat, T., Ponglimanont, C., Mahabusarakam, W., Chakthong, S. (2011). Saiyutones A-D: four new unusual biflavones from Desmos chinensis. Tetrahedron 67, 5444-5449.
540	Saiyutone B	Rittiwong, T., Mutarapat, T., Ponglimanont, C., Mahabusarakam, W., Chakthong, S. (2011). Saiyutones A-D: four new unusual biflavones from Desmos chinensis. Tetrahedron 67, 5444-5449.
541	Saiyutone C	Rittiwong, T., Mutarapat, T., Ponglimanont, C., Mahabusarakam, W., Chakthong, S. (2011). Saiyutones A-D: four new unusual biflavones from Desmos chinensis. Tetrahedron 67, 5444-5449.
542	Saiyutone D	Rittiwong, T., Mutarapat, T., Ponglimanont, C., Mahabusarakam, W., Chakthong, S. (2011). Saiyutones A-D: four new unusual biflavones from Desmos chinensis. Tetrahedron 67, 5444-5449.
543	Amentoflavanone	Ahmad, I., Ishratullah, K., Ilyas, M., Rahman, W., Seligmann, O., Wagner, H. (1981). Tetrahydroamentoflavone from nuts of Semecarpus prainii. Phytochemistry 20, 1169-1170.
544	Podoverine C	Arens, H., Ulbrich, B., Fischer, H., Parnham, M., Romer, A. (1986). Novel Antiinflammatory Flavonoids from Podophyllum versipelle Cell Culture. Planta Medica 52, 468-473.
545	Podoverine B	Arens, H., Ulbrich, B., Fischer, H., Parnham, M., Romer, A. (1986). Novel Antiinflammatory Flavonoids from Podophyllum versipelle Cell Culture. Planta Medica 52, 468-473.
546	3,8"-Biapigenin	Berghofer, R., Holzl, J. (1987). Biflavonoids in Hypericum perforatum: Part 1. Isolation of I3-II8-Biapigenin. Planta Medica 53, 216-217.
548	Di(8-daidzeinyl)methane	Xiao, Y., Zhu, X., Yuan, J., Yang, L., Xue, Y., Mao, P., Qu, L. (2014). Synthesis and Characterization of Novel Unnatural Di(8-daidzeinyl)methane. Chem. Nat. Compd. 50, 76-79.
549	8-[2,4-Dihydroxy-6-methoxy-5-methyl-3-{1-oxo-3-(4-hydroxyphenylpropyl)}phenyl]methylene-3,5,7-trihydroxy-2-(4-methoxyphenyl)-4H-1-benzopyran-4-one	Iinuma, M., Kakuto, Y., Tanida, N., Tanaka, T., Lang, F. (1997). Unusual Biflavonoids in the Farinose Exudate of Pentagramma triangularis. Phytochemistry 44, 705-710.
550	8-[2,4-Dihydroxy-6-methoxy-5-methyl-3-{ 1-oxo-3-(4-hydroxyphenylpropyl)}phenyl]methylene-5,7-trihydroxy-3-methoxy-2-(4-methoxyphenyl)-4H-l-benzopyran-4-one	Iinuma, M., Kakuto, Y., Tanida, N., Tanaka, T., Lang, F. (1997). Unusual Biflavonoids in the Farinose Exudate of Pentagramma triangularis. Phytochemistry 44, 705-710.
551	8-[2,4-Dihydroxy-6-methoxy-5-methyl-3-{ 1-oxo-3-(4-hydroxyphenylpropyl)}phenyl]methylene-5,7-trihydroxy-3-methoxy-2-phenyl-4H-l-benzopyran-4-one	Iinuma, M., Kakuto, Y., Tanida, N., Tanaka, T., Lang, F. (1997). Unusual Biflavonoids in the Farinose Exudate of Pentagramma triangularis. Phytochemistry 44, 705-710.
552	Trianguletin	Iinuma, M., Tanaka, T., Suzuki, K., Lang, F. (1994). Two Biflavonoids in the Farinose Exudate of Pentagramma triangularis. Phytochemistry 35, 1043-1047.
553	4H-​1-​Benzopyran-​4-​one, 8-​[[2,​4-​dihydroxy-​6-​methoxy-​5-​methyl-​3-​(1-​oxo-​3-​ phenylpropyl)​phenyl]​methyl]​-​5,​7-​dihydroxy-​3-​methoxy-​2-​phenyl-	Iinuma, M., Tanaka, T., Suzuki, K., Lang, F. (1994). Two Biflavonoids in the Farinose Exudate of Pentagramma triangularis. Phytochemistry 35, 1043-1047.
554	Jeediflavanone	Murthy, S. (1985). Jeediflavanone-A Biflavonoid From Semecarpus anacardium. Phytochemistry 24, 1065-1069.
555	Jeediflavanone tetramethyl ether	Murthy, S. (1985). Jeediflavanone-A Biflavonoid From Semecarpus anacardium. Phytochemistry 24, 1065-1069.
556	Jeediflavanone pentamethyl ether	Murthy, S. (1985). Jeediflavanone-A Biflavonoid From Semecarpus anacardium. Phytochemistry 24, 1065-1069.
557	Jeediflavanone tetramethyl ether triacetate	Murthy, S. (1985). Jeediflavanone-A Biflavonoid From Semecarpus anacardium. Phytochemistry 24, 1065-1069.
558	Jeediflavanone heptaacetate	Murthy, S. (1985). Jeediflavanone-A Biflavonoid From Semecarpus anacardium. Phytochemistry 24, 1065-1069.
559	3'''-Hydroxyamentoflavone	Murthy, S. (1985). Jeediflavanone-A Biflavonoid From Semecarpus anacardium. Phytochemistry 24, 1065-1069.
560	SA5 heptaacetate: 2-(4-acetoxy-3-(5,7-diacetoxy-2-(3,4-diacetoxyphenyl)-4-oxo-4H-chromen-8-yl)phenyl)-4-oxo-4H-chromene-5,7-diyl diacetate	Murthy, S. (1985). Jeediflavanone-A Biflavonoid From Semecarpus anacardium. Phytochemistry 24, 1065-1069.
561	SA5 heptamethyl ether	Murthy, S. (1985). Jeediflavanone-A Biflavonoid From Semecarpus anacardium. Phytochemistry 24, 1065-1069.
562	Campylospermone A	Manga, S., Tih, A., Ghogomu, R., Blond, A., Bodo, B. (2009). Biflavonoid constituents of Campylospermum mannii. Biochem. Syst. Ecol. 37, 402-404.
563	Campylospermone B	Manga, S., Tih, A., Ghogomu, R., Blond, A., Bodo, B. (2009). Biflavonoid constituents of Campylospermum mannii. Biochem. Syst. Ecol. 37, 402-404.
564	3-O-α-L-Rhamnopyranosylmyricetinyl-(I-2″,II-2″)-3-O-α-L-rhamnopyranosylmyricetin	Kamiya, K., Satake, T. (2010). Chemical constituents of Baeckea frutescens leaves inhibit copper-induced low-density lipoprotein oxidation. Fitoterapia 81, 185-189.
565	3'-O-Methyl loniflavone	Kumar, N., Singh, B., Bhandari, P., Gupta, A., Uniyal, S., Kaul, V. (2005). Biflavonoids from Lonicera japonica. Phytochemistry 66, 2740-2744.
566	Loniflavone	Kumar, N., Singh, B., Bhandari, P., Gupta, A., Uniyal, S., Kaul, V. (2005). Biflavonoids from Lonicera japonica. Phytochemistry 66, 2740-2744.
567	Robustaflavone 4',7''-dimethyl ether	He, K., Timmermann, B., Aladesanmi, A., Zeng, L. (1996). A Biflavonoid from Dysoxylum lenticellare Gillespie. Phytochemistry 42, 1199-1201.; Guodong, Z. (2006). Natural Products from Selaginella. M.S. Dissertation, National University of Singapore.
568	(2R,2'S,3S,3'R)-7,7'-Dihydroxy-2,2'-bis(4-hydroxyphenyl)-[3,3'-bichromane]-4,4'-dione	Ichino, C., Kiyohara, H., Soonthornchareonnon, N., Chuakul, W., Ishiyama, A., Sekiguchi, H., Namatame, M., Otoguro, K., Omura, S., Yamada, H. (2006). Antimalarial Activity of Biflavonoids from Ochna inegerrima. Planta Medica 72, 611-614.
569	(2S,2'S,3R,3'R)-7,7'-Dihydroxy-2,2'-bis(4-hydroxyphenyl)-[3,3'-bichromane]-4,4'-dione	Ichino, C., Kiyohara, H., Soonthornchareonnon, N., Chuakul, W., Ishiyama, A., Sekiguchi, H., Namatame, M., Otoguro, K., Omura, S., Yamada, H. (2006). Antimalarial Activity of Biflavonoids from Ochna inegerrima. Planta Medica 72, 611-614.
570	Sciadopitysin	Ryu, Y., Jeong, H., Kim, J., Kim, Y., Park, J., Kim, D., Naguyen, T., Park, S., Chang, J., Park, K., Rho, M., Lee, W. (2010). Biflavonoids from Torreya nucifera displaying SARS-CoV 3CLpro inhibition. Bioorg. Med. Chem. 18, 7940-7947.; Wollenweber, E., Kraut, L., Mues, R. (1998). External Accumulation of Biflavonoids on Gymnosperm Leaves. Z. Naturforsch. 53c, 946-950.
571	2,3-Dihydro-3',3'''-biapigenin	Seeger, T., Geiger, H., Zinsmeister, H., Rozdzinski, W. (1993). Biflavonoids From The Moss Homalothecium lutescens. Phytochemistry 34, 295-296.; Li, S., Zhao, M., Li, Y., Sui, Y., Yao, H., Huang, L., Lin, X. (2014). Preparative Isolation of six Anti-Tumour Biflavonoids from Selaginella Doederleinii Hieron by High-Speed Counter-Current Chromatography. Phytochem. Anal. 25, 127-133.
572	Sikokianin B	Nunome, S., Ishiyama, A., Kobayashi, M., Otoguro, K., Kiyohara, H., Yamada, H., Omura, S. (2004). In Vitro Antimalarial Activity of Biflavonoids from Wikstroemia indica. Planta Medica 70, 76-78.; Niwa, M., Jiang, P., Hirata, Y. (1986). Two New C-3/C-3"-Biflavanones from Wikstroemia sikokiana. Chem. Pharm. Bull. 34, 3631-3634.
573	Sikokianin C	Nunome, S., Ishiyama, A., Kobayashi, M., Otoguro, K., Kiyohara, H., Yamada, H., Omura, S. (2004). In Vitro Antimalarial Activity of Biflavonoids from Wikstroemia indica. Planta Medica 70, 76-78.; Baba, K., Taniguchi, M., Kozawa, M. (1994). Three Biflavonoids From Wikstroemia sikokiana. Phytochemistry 37, 879-883.
574	Lanaroflavone	Dora, G., Edwards, J. (1991). Taxonomic Status of Lanaria lanata and Isolation of a Novel Biflavone. J. Nat. Prod. 54, 796-801.
575	Lanaroflavone pentamethyl ether	Dora, G., Edwards, J. (1991). Taxonomic Status of Lanaria lanata and Isolation of a Novel Biflavone. J. Nat. Prod. 54, 796-801.
576	6,2',3",5",4'''-Pentahydroxy-3,7"-biflavone	Sabudak, T., Kaya, O., Cukurova, E. (2015). A new biflavonoid from Solanum dulcamara L. and investigation of anti-hyperglycaemic activity of its fruit extract. Nat. Prod. Res. 29, 308-314.
577	Pyranoamentoflavone	Goh, S., Jantan, I., Waterman, P. (1992). Neoflavonoid and Biflavonoid Constituents of Calophyllum inophylloide. J. Nat. Prod. 55, 1415-1420.
579	Lawsonia biflavone A	Li, Q., Gao, W., Cao, J., Bi, X., Chen, G., Zhang, X., Xia, X., Zhao, Y. (2014). New cytotoxic compounds from flowers of Lawsonia inermis L. Fitoterapia 94, 148-154.
580	2''-Methoxydaphnodorin C	Liang, S., Tang, J., Shen, Y., Jin, H., Tian, J., Wu, Z., Zhang, W., Yan, S. (2008). Biflavonoids from Daphne feddei and Their Inhibitory Activities against Nitric Oxide Production. Chem Pharm. Bull. 56, 1729-1731.
581	2''-Methoxy-2-epi-daphnodorin C	Liang, S., Tang, J., Shen, Y., Jin, H., Tian, J., Wu, Z., Zhang, W., Yan, S. (2008). Biflavonoids from Daphne feddei and Their Inhibitory Activities against Nitric Oxide Production. Chem Pharm. Bull. 56, 1729-1731.
582	Daphnodorin G	Taniguchi, M., Baba, K. (1996). Three Biflavonoids From Daphne odora. Phytochemistry 42, 1447-1453.
583	Daphnodorin H	Taniguchi, M., Baba, K. (1996). Three Biflavonoids From Daphne odora. Phytochemistry 42, 1447-1453.
584	Daphnodorin I	Taniguchi, M., Baba, K. (1996). Three Biflavonoids From Daphne odora. Phytochemistry 42, 1447-1453.
585	Daphnodorin E	Taniguchi, M., Baba, K. (1996). Three Biflavonoids From Daphne odora. Phytochemistry 42, 1447-1453.; Baba, K., Yoshikawa, M., Taniguchi, M., Kozawa, M. (1995). Biflavonoids from Daphne odora. Phytochemistry 38, 1021-1026.
586	Daphnodorin F	Taniguchi, M., Baba, K. (1996). Three Biflavonoids From Daphne odora. Phytochemistry 42, 1447-1453.
587	Genkwanol A	Taniguchi, M., Baba, K. (1996). Three Biflavonoids From Daphne odora. Phytochemistry 42, 1447-1453.; Baba, K., Taniguchi, M., Kozawa, M. (1993). A Third Spirobiflavonoid Genkwanol C From Daphne genkwa. Phytochemistry 33, 913-916.
588	Daphnodorin J	Taniguchi, M., Fujiwara, A., Baba, K. (1997). Three Flavonoids from Daphne odora. Phytochemistry 45, 183-188.
589	Daphnodorin K	Taniguchi, M., Fujiwara, A., Baba, K. (1997). Three Flavonoids from Daphne odora. Phytochemistry 45, 183-188.
590	Daphnodorin L	Taniguchi, M., Fujiwara, A., Baba, K. (1997). Three Flavonoids from Daphne odora. Phytochemistry 45, 183-188.
591	Dihydrodaphnodorin B	Taniguchi, M., Fujiwara, A., Baba, K. (1997). Three Flavonoids from Daphne odora. Phytochemistry 45, 183-188.
592	Daphnodorin D1	Taniguchi, M., Fujiwara, A., Baba, K. (1997). Three Flavonoids from Daphne odora. Phytochemistry 45, 183-188.; Baba, K., Taniguchi, M., Kozawa, M. (1994). Three Biflavonoids From Wikstroemia sikokiana. Phytochemistry 37, 879-883.
593	Daphnodorin D2	Taniguchi, M., Fujiwara, A., Baba, K. (1997). Three Flavonoids from Daphne odora. Phytochemistry 45, 183-188.; Baba, K., Taniguchi, M., Kozawa, M. (1994). Three Biflavonoids From Wikstroemia sikokiana. Phytochemistry 37, 879-883.
594	3'''-O-methylamentoflavone	Sun, M., Feng, X., Yin, M., Chen, Y., Zhao, X., Dong, Y. (2012). A Biflavonoid from Stems and Leaves of Lonicera macranthoides. Chem. Nat. Compd. 48, 231-233.
595	Carinoside A	Wang, Q., Han, N., Wu, X., Tai, W., Dai, N., Wu, R., Wu, J., Bao, B. (2015). A biflavonoid glycoside from Lomatogonium carinthiacum (Wulf) Reichb. Nat. Prod. Res. 29, 77-81.
596	(+)-Morelloflavone-7''-sulfate	Li, X., Joshi, A., Tan, B., ElSohly, H., Walker, L., Zjawiony, J., Ferreira, D. (2002). Absolute configuration, conformation, and chiral properties of flavanone-(3→8")-flavone biflavonoids from Rheedia acuminata. Tetrahedron 58, 8709-8717.
597	(+)-Volkensiflavone-7'-sulfate	Li, X., Joshi, A., Tan, B., ElSohly, H., Walker, L., Zjawiony, J., Ferreira, D. (2002). Absolute configuration, conformation, and chiral properties of flavanone-(3→8")-flavone biflavonoids from Rheedia acuminata. Tetrahedron 58, 8709-8717.
598	Daphnodorin M tetramethyl ether	Taniguchi, M., Fujiwara, A., Baba, K., Wang, N. (1998). Two Biflavonoids from Daphne acutiloba. Phytochemistry 49, 863-867.
599	Daphnodorin N tetramethyl ether	Taniguchi, M., Fujiwara, A., Baba, K., Wang, N. (1998). Two Biflavonoids from Daphne acutiloba. Phytochemistry 49, 863-867.
600	Genkwanol B hexamethyl ether	Taniguchi, M., Fujiwara, A., Baba, K., Wang, N. (1998). Two Biflavonoids from Daphne acutiloba. Phytochemistry 49, 863-867.
601	Genkwanol C hexamethyl ether	Taniguchi, M., Fujiwara, A., Baba, K., Wang, N. (1998). Two Biflavonoids from Daphne acutiloba. Phytochemistry 49, 863-867.
602	Ephedrannin B	Xu, M., Shen, L., Wang, K. (2009). A new biflavonoid from Daphniphyllum angustifolium Hutch. Fitoterapia 80, 461-464.
603	Ephedrannin A	Xu, M., Shen, L., Wang, K. (2009). A new biflavonoid from Daphniphyllum angustifolium Hutch. Fitoterapia 80, 461-464.
604	2,3-Dihydro-5,5",7,7",4'-pentahydroxy-6,6"-dimethyl-[3'-O-4''']-biflavone	Xu, J., Liu, X., Chen, K. (2009). A new biflavonoid from Selaginella labordei Hieron. ex Christ. Chin. Chem. Lett. 20, 939-941.
605	Thuidinin	Zhao, X., Jiang, H., Huang, H., Zhu, R., Jiang, B. (2006). Ring-B Linked Bidihydroflavonoids from Thuidium kanedae Sak. Chin. J. Chem. 24, 393-395.
606	Lophirone L	Tih, A., Ghogomu, R., Sondengam, B., Caux, C., Bodo, B. (2006). Minor Biflavonoids from Lophira alata Leaves. J. Nat. Prod. 69, 1206-1208.
607	Lophirone M	Tih, A., Ghogomu, R., Sondengam, B., Caux, C., Bodo, B. (2006). Minor Biflavonoids from Lophira alata Leaves. J. Nat. Prod. 69, 1206-1208.
608	Lophirone L penta-acetate	Tih, A., Ghogomu, R., Sondengam, B., Caux, C., Bodo, B. (2006). Minor Biflavonoids from Lophira alata Leaves. J. Nat. Prod. 69, 1206-1208.
609	Lophirone M hexa-acetate	Tih, A., Ghogomu, R., Sondengam, B., Caux, C., Bodo, B. (2006). Minor Biflavonoids from Lophira alata Leaves. J. Nat. Prod. 69, 1206-1208.
610	3'-Hydroxydaphnodorin A	Shao, M., Huang, X., Liu, J., Han, W., Cai, H., Tang, Q., Fan, Q. (2016). A new cytotoxic biflavonoid from the rhizome of Wikstroemia indica. Nat. Prod. Res. 30, 1417-1422.
611	Hypnogenol A	Sievers, H., Burkhardt, G., Becker, H., Zinsmeister, H. (1992). Hypnogenols and Other Dihydroflavonols from the Moss Hypnum cupressiforme. Phytochemistry 31, 3233-3237.
612	Hypnogenol B	Sievers, H., Burkhardt, G., Becker, H., Zinsmeister, H. (1992). Hypnogenols and Other Dihydroflavonols from the Moss Hypnum cupressiforme. Phytochemistry 31, 3233-3237.
613	3,5,7,4',3",5",7",3''',4'''-Nonahydroxy-3'-6"-biflavanone	Sievers, H., Burkhardt, G., Becker, H., Zinsmeister, H. (1992). Hypnogenols and Other Dihydroflavonols from the Moss Hypnum cupressiforme. Phytochemistry 31, 3233-3237.
614	3,5,7,4',3",5",7"-Heptahydroxy-3'-O-4'''-biflavanone	Sievers, H., Burkhardt, G., Becker, H., Zinsmeister, H. (1992). Hypnogenols and Other Dihydroflavonols from the Moss Hypnum cupressiforme. Phytochemistry 31, 3233-3237.
615	1''',2''',3''',4'''-Tetrahydro-3,5,7,3",5",7"-hexahydroxy-4'''-keto-3'-1''',4'-O-2'''-biflavanone	Sievers, H., Burkhardt, G., Becker, H., Zinsmeister, H. (1992). Hypnogenols and Other Dihydroflavonols from the Moss Hypnum cupressiforme. Phytochemistry 31, 3233-3237.
616	Tetrahydrohinokiflavone	Rani, M., Rao, C., Gunasekar, D., Blond, A., Bodo, B. (1998). A Biflavonoid from Cycas beddomei. Phytochemistry 47, 319-321.
617	Tetrahydrohinokiflavone pentaacetate	Rani, M., Rao, C., Gunasekar, D., Blond, A., Bodo, B. (1998). A Biflavonoid from Cycas beddomei. Phytochemistry 47, 319-321.
618	7-O-Methylnaringenin-(4'→O→6")-scutellarein	Luo, J., Zhou, W., Cao, S., Jin, M., Zhang, C., Jin, X., Cui, J., Li, G. (2015). A new biflavonoid from the whole herb of Lepisorus ussuriensis. Nat. Prod. Res. 1-7.
619	Lophirone C	Pegnyemb, D., Tih, R., Sondengam, B., Blond, A., Bodo, B. (2001). Biflavonoids from Ochna afzelii. Phytochemistry 57, 579-582.; Tih, R., Sondengam, B., Martin, M., Bodo, B. (1989). Structure of Lophirones B and C, Biflavonoids From the Bark of Lophira lanceolata. Phytochemistry 28, 1557-1559.
620	Isolophirone C	Pegnyemb, D., Tih, R., Sondengam, B., Blond, A., Bodo, B. (2001). Biflavonoids from Ochna afzelii. Phytochemistry 57, 579-582.
621	Dihydrolophirone C	Pegnyemb, D., Tih, R., Sondengam, B., Blond, A., Bodo, B. (2001). Biflavonoids from Ochna afzelii. Phytochemistry 57, 579-582.
622	Isolophirone C pentaacetate	Pegnyemb, D., Tih, R., Sondengam, B., Blond, A., Bodo, B. (2001). Biflavonoids from Ochna afzelii. Phytochemistry 57, 579-582.
623	Dihydrolophirone C pentaacetate	Pegnyemb, D., Tih, R., Sondengam, B., Blond, A., Bodo, B. (2001). Biflavonoids from Ochna afzelii. Phytochemistry 57, 579-582.
624	Stephaflavone A	Si, D., Zhong, D., Sha, Y., Li, W. (2001). Biflavonoids from the aerial part of Stephania tetrandra. Phytochemistry 58, 563-566.
625	Stephaflavone B	Si, D., Zhong, D., Sha, Y., Li, W. (2001). Biflavonoids from the aerial part of Stephania tetrandra. Phytochemistry 58, 563-566.
626	Sulcatone A	Pegnyemb, D., Mbing, J., Atchade, A., Tih, R., Sondengam, B., Blond, A., Bodo, B. (2005). Antimicrobial biflavonoids from the aerial parts of Ouratea sulcata. Phytochemistry 66, 1922-1926.
627	3-Hydroxy-2,3-dihydroapigenyl-[I-4',O,II-3']-dihydrokaempferol	Pegnyemb, D., Mbing, J., Atchade, A., Tih, R., Sondengam, B., Blond, A., Bodo, B. (2005). Antimicrobial biflavonoids from the aerial parts of Ouratea sulcata. Phytochemistry 66, 1922-1926.
630	Hegoflavone A	Wada, H., Satake, T., Murakami, T., Kojima, T., Saiki, Y., Chen, C. (1985). Chemische und Chemotaxonomische Untersuchungen der Pterophyten. LIX. Chemische Untersuchungen der Inhaltstoffe von Alsophila spinulosa Tryon. Chem. Pharm. Bull. 33, 4182-4187.
631	Hegoflavone B	Wada, H., Satake, T., Murakami, T., Kojima, T., Saiki, Y., Chen, C. (1985). Chemische und Chemotaxonomische Untersuchungen der Pterophyten. LIX. Chemische Untersuchungen der Inhaltstoffe von Alsophila spinulosa Tryon. Chem. Pharm. Bull. 33, 4182-4187.
632	Apigeninluteolin 6,6'''-dimer	Wada, H., Satake, T., Murakami, T., Kojima, T., Saiki, Y., Chen, C. (1985). Chemische und Chemotaxonomische Untersuchungen der Pterophyten. LIX. Chemische Untersuchungen der Inhaltstoffe von Alsophila spinulosa Tryon. Chem. Pharm. Bull. 33, 4182-4187.
634	Caesalflavone	Aguilar, M., Romero, M., Chavez, M., King-Diaz, B., Lotina-Hennsen, B. (2008). Biflavonoids Isolated from Selaginella lepidophylla Inhibit Photosynthesis in Spinach Chloroplasts. J. Agric. Food Chem. 56, 6994-7000.; Bahia, M., dos Santos, J., David, J., David, J. (2005). Biflavonoids and other Phenolics from Caesalpinia pyramidalis (Fabaceae). J. Braz. Chem. Soc. 16, 1402-1405.
635	2,3-Dihydrorobustaflavone 5-methyl ether	Aguilar, M., Romero, M., Chavez, M., King-Diaz, B., Lotina-Hennsen, B. (2008). Biflavonoids Isolated from Selaginella lepidophylla Inhibit Photosynthesis in Spinach Chloroplasts. J. Agric. Food Chem. 56, 6994-7000.
636	(2S,2''S)-2,2",3,3"-Tetrahydrorobustaflavone 7,4',7"-trimethyl ether	Lee, N., Min, H., Lee, J., Nam, J., Lee, Y., Han, A., Wiryawan, A., Suprapto, W., Lee, S., Seo, E. (2008). Identification of a New Cytotoxic Biflavanone from Selaginella doederleinii. Chem. Pharm. Bull. 56, 1360-1361.
637	Chrysocauloflavone I	Swamy, R., Kunert, O., Schuhly, W., Bucar, F., Ferreira, D., Rani, V., Kumar, B., Rao, A. (2006). Structurally Unique Biflavonoids from Selaginella chrysocaulos and Selaginella bryopteris. Chem. Biodiversity 3, 405-414.
638	Chrysocauloflavone II	Swamy, R., Kunert, O., Schuhly, W., Bucar, F., Ferreira, D., Rani, V., Kumar, B., Rao, A. (2006). Structurally Unique Biflavonoids from Selaginella chrysocaulos and Selaginella bryopteris. Chem. Biodiversity 3, 405-414.
639	Chrysocauloflavone III	Swamy, R., Kunert, O., Schuhly, W., Bucar, F., Ferreira, D., Rani, V., Kumar, B., Rao, A. (2006). Structurally Unique Biflavonoids from Selaginella chrysocaulos and Selaginella bryopteris. Chem. Biodiversity 3, 405-414.
641	Sikokianin A	Niwa, M., Jiang, P., Hirata, Y. (1986). Two New C-3/C-3"-Biflavanones from Wikstroemia sikokiana. Chem. Pharm. Bull. 34, 3631-3634.
642	Neochamaejasmin A	Niwa, M., Jiang, P., Hirata, Y. (1986). Two New C-3/C-3"-Biflavanones from Wikstroemia sikokiana. Chem. Pharm. Bull. 34, 3631-3634.; Niwa, M., Tatematsu, H., Liu, G., Hirata, Y. (1984). Isolation and Structures of Two New C-3/C-3"-Biflavanones, Neochamaejasmin A and Neochamaejasmin B. Chem. Lett. 539-542.
643	Neochamaejasmin B	Niwa, M., Jiang, P., Hirata, Y. (1986). Two New C-3/C-3"-Biflavanones from Wikstroemia sikokiana. Chem. Pharm. Bull. 34, 3631-3634.; Niwa, M., Tatematsu, H., Liu, G., Hirata, Y. (1984). Isolation and Structures of Two New C-3/C-3"-Biflavanones, Neochamaejasmin A and Neochamaejasmin B. Chem. Lett. 539-542.
644	Sikokianin D	Li, J., Lu, L., Zeng, L., Zhang, C., Hu, J., Li, X. (2012). Sikokianin D, A New C-3/C-3"-Biflavanone from the Roots of Wikstroemia indica. Molecules 17, 7792-7797.
645	2,3-Dihydrosciadopitysin	Wollenweber, E., Kraut, L., Mues, R. (1998). External Accumulation of Biflavonoids on Gymnosperm Leaves. Z. Naturforsch. 53c, 946-950.
646	Cupressuflavone	Wollenweber, E., Kraut, L., Mues, R. (1998). External Accumulation of Biflavonoids on Gymnosperm Leaves. Z. Naturforsch. 53c, 946-950.; Shrestha, S., Park, J., Lee, D., Cho, J., Cho, S., Yang, H., Yong, H., Yoon, M., Han, D., Baek, N. (2012). Rhus parviflora and its biflavonoid constituent, rhusflavone, induce sleep through the positive allosteric modulation of GABAA-benzodiazepine receptors. J. …
647	Lanceolatin A	Pegnyemb, D., Ghogomu-Tih, R., Sondengam, B., Martin, M., Bodo, B. (1994). Minor Biflavonoids of Lophira lanceolata. J. Nat. Prod. 57, 1275-1278.
648	Lanceolatin B	Pegnyemb, D., Ghogomu-Tih, R., Sondengam, B., Martin, M., Bodo, B. (1994). Minor Biflavonoids of Lophira lanceolata. J. Nat. Prod. 57, 1275-1278.
649	Lanceolatin A hexaacetate	Pegnyemb, D., Ghogomu-Tih, R., Sondengam, B., Martin, M., Bodo, B. (1994). Minor Biflavonoids of Lophira lanceolata. J. Nat. Prod. 57, 1275-1278.
650	Lanceolatin B pentaacetate	Pegnyemb, D., Ghogomu-Tih, R., Sondengam, B., Martin, M., Bodo, B. (1994). Minor Biflavonoids of Lophira lanceolata. J. Nat. Prod. 57, 1275-1278.
651	Lanceolatin A hexamethyl ether	Pegnyemb, D., Ghogomu-Tih, R., Sondengam, B., Martin, M., Bodo, B. (1994). Minor Biflavonoids of Lophira lanceolata. J. Nat. Prod. 57, 1275-1278.
652	Mesuaferrone B	Shrestha, S., Park, J., Lee, D., Cho, J., Cho, S., Yang, H., Yong, H., Yoon, M., Han, D., Baek, N. (2012). Rhus parviflora and its biflavonoid constituent, rhusflavone, induce sleep through the positive allosteric modulation of GABAA-benzodiazepine receptors. J. Ethnopharmacol. 142, 213-220.
653	Rhusflavanone	Shrestha, S., Park, J., Lee, D., Cho, J., Cho, S., Yang, H., Yong, H., Yoon, M., Han, D., Baek, N. (2012). Rhus parviflora and its biflavonoid constituent, rhusflavone, induce sleep through the positive allosteric modulation of GABAA-benzodiazepine receptors. J. Ethnopharmacol. 142, 213-220.
654	Rhusflavone	Shrestha, S., Park, J., Lee, D., Cho, J., Cho, S., Yang, H., Yong, H., Yoon, M., Han, D., Baek, N. (2012). Rhus parviflora and its biflavonoid constituent, rhusflavone, induce sleep through the positive allosteric modulation of GABAA-benzodiazepine receptors. J. Ethnopharmacol. 142, 213-220.
656	Sotetsuflavone	Guodong, Z. (2006). Natural Products from Selaginella. M.S. Dissertation, National University of Singapore.
657	Delicaflavone	Guodong, Z. (2006). Natural Products from Selaginella. M.S. Dissertation, National University of Singapore.
658	2'',3''-Dihydroisocryptomerin	Guodong, Z. (2006). Natural Products from Selaginella. M.S. Dissertation, National University of Singapore.; Silva, G., Chai, H., Gupta, M., Farnsworth, N., Cordell, G., Pezzuto, J., Beecher, C., Kinghorn, A. (1995). Cytotoxic Biflavonoids from Selaginella willdenowii. Phytochemistry 40, 129-134.
659	2"S,3"-Dihydrodelicaflavone	Guodong, Z. (2006). Natural Products from Selaginella. M.S. Dissertation, National University of Singapore.
660	6"-Methyl-2",3"-dihydrodelicaflavone	Guodong, Z. (2006). Natural Products from Selaginella. M.S. Dissertation, National University of Singapore.
663	4',7''-di-O-Methylamentoflavone	Guodong, Z. (2006). Natural Products from Selaginella. M.S. Dissertation, National University of Singapore.; Silva, G., Chai, H., Gupta, M., Farnsworth, N., Cordell, G., Pezzuto, J., Beecher, C., Kinghorn, A. (1995). Cytotoxic Biflavonoids from Selaginella willdenowii. Phytochemistry 40, 129-134.
664	2'',3''-Dihydro-4'-O-4'''-biapigenin 7''-methyl ether	Guodong, Z. (2006). Natural Products from Selaginella. M.S. Dissertation, National University of Singapore.
665	Neochamaejasmin C	Li, J., Zhao, W., Hu, J., Cao, X., Yang, J., Li, X. (2011). A New C-3/C-3"-Biflavanone from the Roots of Stellera chamaejasme L. Molecules 16, 6465-6469.
666	(2S,2″S)-2,3,2″,3″-Tetrahydro-4′,4‴-di-O-methylamentoflavone	Moawad, A., Hetta, M., Zjawiony, J., Jacob, M., Hifnawy, M., Ferreira, D. (2010). Phytochemical Investigation of Cycas circinalis and Cycas revoluta Leaflets: Moderately Active Antibacterial Biflavonoids. Planta Med. 76, 796-802.
667	(2S,2″S)-2,3,2″,3″-Tetrahydrobilobetin	Moawad, A., Hetta, M., Zjawiony, J., Jacob, M., Hifnawy, M., Ferreira, D. (2010). Phytochemical Investigation of Cycas circinalis and Cycas revoluta Leaflets: Moderately Active Antibacterial Biflavonoids. Planta Med. 76, 796-802.
668	(2S)-2,3-Dihydrobilobetin	Moawad, A., Hetta, M., Zjawiony, J., Jacob, M., Hifnawy, M., Ferreira, D. (2010). Phytochemical Investigation of Cycas circinalis and Cycas revoluta Leaflets: Moderately Active Antibacterial Biflavonoids. Planta Med. 76, 796-802.
669	Himantoflavone	Xiaowei, G. (2007). Chemistry of Bryophytes. PhD. Dissertation, National University of Singapore.
670	(2R,3S)Volkensiflavone-7-O-rhamnopyranoside.	Jamila, N., Khairuddean, M., Khan, S., Khan, N. (2014). Complete NMR assignments of bioactive rotameric (3→8) biflavonoids from the bark of Garcinia hombroniana. Magn. Reson. Chem. 52, 345-352.
671	Volkensiflavone	Jamila, N., Khairuddean, M., Khan, S., Khan, N. (2014). Complete NMR assignments of bioactive rotameric (3→8) biflavonoids from the bark of Garcinia hombroniana. Magn. Reson. Chem. 52, 345-352.
672	Volkensiflavone-7-O-glucopyranoside	Jamila, N., Khairuddean, M., Khan, S., Khan, N. (2014). Complete NMR assignments of bioactive rotameric (3→8) biflavonoids from the bark of Garcinia hombroniana. Magn. Reson. Chem. 52, 345-352.
673	Ormocarpin	Xu, Y., Rica, C., Dhooghe, L., Foubert, K., Lemiere, F., Maregesi, S., Balde, A., Apers, S., Pieters, L. (2011). Herbal Medicines and Infectious Diseases: Characterization by LC-SPE-NMR of Some Medicinal Plant Extracts Used against Malaria. Planta Med. 77, 1139-1148.
674	(2R,3S,2''R,3''R)-Ormocarpin	Xu, Y., Rica, C., Dhooghe, L., Foubert, K., Lemiere, F., Maregesi, S., Balde, A., Apers, S., Pieters, L. (2011). Herbal Medicines and Infectious Diseases: Characterization by LC-SPE-NMR of Some Medicinal Plant Extracts Used against Malaria. Planta Med. 77, 1139-1148.
675	7-O-β-D-Glucosyl-(I-3,II-3)-biliquiritigenin	Xu, Y., Rica, C., Dhooghe, L., Foubert, K., Lemiere, F., Maregesi, S., Balde, A., Apers, S., Pieters, L. (2011). Herbal Medicines and Infectious Diseases: Characterization by LC-SPE-NMR of Some Medicinal Plant Extracts Used against Malaria. Planta Med. 77, 1139-1148.
676	Isovitexin-(I-3,II-3)-naringenin	Xu, Y., Rica, C., Dhooghe, L., Foubert, K., Lemiere, F., Maregesi, S., Balde, A., Apers, S., Pieters, L. (2011). Herbal Medicines and Infectious Diseases: Characterization by LC-SPE-NMR of Some Medicinal Plant Extracts Used against Malaria. Planta Med. 77, 1139-1148.
677	5-Hydroxy-7-methoxyflavone(4'-O-8")4''',5",7"-trihydroxyflavone	Velandia, J., de Carvalho, M., Braz-Filho, R., Werle, A. (2002). Biflavonoids and a Glucopyranoside Derivative from Ouratea semiserrata. Phytochem. Anal. 13, 283-292.
678	5-hydroxy-7-methoxyflavone(4'-O-8")5",7"-dihydroxy-4'''-methoxyflavone	Velandia, J., de Carvalho, M., Braz-Filho, R., Werle, A. (2002). Biflavonoids and a Glucopyranoside Derivative from Ouratea semiserrata. Phytochem. Anal. 13, 283-292.
679	7"-O-Methoxyrobustaflavone	Silva, G., Chai, H., Gupta, M., Farnsworth, N., Cordell, G., Pezzuto, J., Beecher, C., Kinghorn, A. (1995). Cytotoxic Biflavonoids from Selaginella willdenowii. Phytochemistry 40, 129-134.
680	Hypnogenol B1	Sievers, H., Burkhardt, G., Becker, H., Zinsmeister, H. (1994). Further Biflavonoids and 3'-Phenylflavonoids from Hypnum cupressiforme. Phytochemistry 33, 795-798.
681	Hypnumbiflavonoid A	Sievers, H., Burkhardt, G., Becker, H., Zinsmeister, H. (1994). Further Biflavonoids and 3'-Phenylflavonoids from Hypnum cupressiforme. Phytochemistry 33, 795-798.
682	5'-Hydroxyamentoflavone	Seeger, T., Zinsmeister, H., Geiger, H. (1990). The Biflavonoid Pattern of Rhytidiadelphus squarrosus (Hedw.) Warnst. Z. Naturforsch. 45c, 583-586.
683	5'-Hydroxyrobustaflavone	Seeger, T., Zinsmeister, H., Geiger, H. (1990). The Biflavonoid Pattern of Rhytidiadelphus squarrosus (Hedw.) Warnst. Z. Naturforsch. 45c, 583-586.
684	2,3-Dihydro-5'-hydroxyamentoflavone	Anhut, S., Seeger, T., Zinsmeister, H., Geiger, H. (1989). New Dihydrobiflavones from the Moss Plagiomnium cuspidatum. Z. Naturforsch. 44c, 189-192.
685	2,3-Dihydro-5',3'''-dihydroxyamentoflavone	Anhut, S., Seeger, T., Zinsmeister, H., Geiger, H. (1989). New Dihydrobiflavones from the Moss Plagiomnium cuspidatum. Z. Naturforsch. 44c, 189-192.
686	7"-O-(6''''-Acetyl)-glucoside of morelloflavone	Osorio, E., Londono, J., Bastida, J. (2013). Low-Density Lipoprotein (LDL)-Antioxidant Biflavonoids from Garcinia madruno. Molecules 18, 6092-6100.
687	(2S)-2,3-Dihydro-4'''-O-methyl amentoflavone	Das, B., Mahender, G., Rao, Y., Prabhakar, A., Jagadeesh, B. (2005). Biflavonoids from Cycas beddomei. Chem. Pharm. Bull. 53, 135-136.
688	7'',4'''-Dimethylamentoflavone	Carbonezi, C., Hamerski, L., Gunatilaka, A., Cavalheiro, A., Castro-Gamboa, I., Silva, D., Furlan, M., Young, M., Lopes, M., Bolzani, V. (2007). Bioactive flavone dimers from Ouratea multiflora (Ochnaceae). Braz. J. Pharmacogn. 17, 319-324.
689	Abiesin	Chatterjee, A., Kotoky, J., Das, K., Banerji, J., Chakraborty, T. (1984). Abiesin, A Biflavonoid of Abies webbiana. Phytochemistry 23, 704-705.
690	2,3-Dihydro-7,7"-dimethoxyamentoflavone	Li, S., Zhang, H., Niu, X., Yao, P., Sun, H., Fong, H. (2003). Chemical Constituents from Amentotaxus yunnanensis and Torreya yunanensis. J. Nat. Prod. 66, 1002-1005.
691	Masazinoflavanone	Mahjoub, M., Ammar, S., Mighri, Z. (2005). A new biflavonoid and an isobiflavonoid from Rhus tripartitum. Nat. Prod. Res. 19, 723-729.
692	Robustaflavone 7,4'-dimethyl ether	Lin, L., Kuo, Y., Chou, C. (2000). Cytotoxic Biflavonoids from Selaginella delicatula. J. Nat. Prod. 63, 627-630.
693	(2''R)-2",3"-Dihydrorobustaflavone 7,4'-dimethyl ether	Lin, L., Kuo, Y., Chou, C. (2000). Cytotoxic Biflavonoids from Selaginella delicatula. J. Nat. Prod. 63, 627-630.
694	(2''R)-2",3"-Dihydrorobustaflavone 7,4',7"-trimethyl ether	Lin, L., Kuo, Y., Chou, C. (2000). Cytotoxic Biflavonoids from Selaginella delicatula. J. Nat. Prod. 63, 627-630.
695	Carinoside B	Bao, B., Wang, Q., Wu, X., Tai, W. (2015). The isolation and structural elucidation of three new biflavonoid glycosides from Lomatogonium carinthiacum. Nat. Prod. Res. 29, 1358-1362.
696	Carinoside C	Bao, B., Wang, Q., Wu, X., Tai, W. (2015). The isolation and structural elucidation of three new biflavonoid glycosides from Lomatogonium carinthiacum. Nat. Prod. Res. 29, 1358-1362.
697	Carinoside D	Bao, B., Wang, Q., Wu, X., Tai, W. (2015). The isolation and structural elucidation of three new biflavonoid glycosides from Lomatogonium carinthiacum. Nat. Prod. Res. 29, 1358-1362.
698	(2S,3R,2''R)-3,8''-Binaringenin	Djoufack, G., Valant-Vetschera, K., Schinnerl, J., Brecker, L., Lorbeer, E., Robien, W. (2010). Xanthones, Biflavanones and Triterpenes from Pentadesma grandifolia (Clusiaceae): Structural Determination and Bioactivity. Nat. Prod. Commun. 5, 1055-1060.
699	(2S,3R,2''R)-3,6''-Binaringenin	Djoufack, G., Valant-Vetschera, K., Schinnerl, J., Brecker, L., Lorbeer, E., Robien, W. (2010). Xanthones, Biflavanones and Triterpenes from Pentadesma grandifolia (Clusiaceae): Structural Determination and Bioactivity. Nat. Prod. Commun. 5, 1055-1060.
700	Licoagrodin	Li, W., Asada, Y., Yoshikawa, T. (2000). Flavonoid constituents from Glycyrrhiza glabra hairy root cultures. Phytochemistry 55, 447-456.
701	Ridiculuflavone D	Machado, M., Lopes, L. (2008). Tetraflavonoid and biflavonoids from Aristolochia ridicula. Phytochemistry 69, 3095-3102.
702	Ridiculuflavone A	Machado, M., Lopes, L. (2005). Chalcone-flavone tetramer and biflavones from Aristolochia ridicula. Phytochemistry 66, 669-674.
703	Ridiculuflavone B	Machado, M., Lopes, L. (2005). Chalcone-flavone tetramer and biflavones from Aristolochia ridicula. Phytochemistry 66, 669-674.
704	4',4'''-Di-O-methyl cupressuflavone	Hnatyszyn, O., Ferraro, G., Coussio, J. (1987). A Biflavonoid From Phyllanthus sellowianus. J. Nat. Prod. 50, 1156-1157.
705	7,4',7',4''-Tetramethylisochamaejasmin	Reddy, B., Reddy, N., Gunasekar, D., Blond, A., Bodo, B. (2008). Phytochem. Lett. 1, 27-30.
706	2,3-Dihydroochnaflavone 7"-O-methyl ether	Reddy, B., Reddy, N., Gunasekar, D., Blond, A., Bodo, B. (2008). Phytochem. Lett. 1, 27-30.
707	Mesquitol-(4α→5)-epimesquitol-4β-ol octa-O-methylether Triacetate	Howell, H., Malan, E., Brand, D., Kamara, B., Bezuidenhoudt, B., Marais, C., Steenkamp, J. (2007). Two New Promelacacinidin Dimers, Including a Novel Flavanone-flavanol Dimer Characterized by a Unique C(3)-C(4) Linkage, From the Heartwood of Acacia nigrescens. Chem. Nat. Compd. 43, 533-538.
708	3',4',7,8-Tetra-O-methylflavanone-(3→4)-tetra-O-methyl-ent-epimesquitol Acetate	Howell, H., Malan, E., Brand, D., Kamara, B., Bezuidenhoudt, B., Marais, C., Steenkamp, J. (2007). Two New Promelacacinidin Dimers, Including a Novel Flavanone-flavanol Dimer Characterized by a Unique C(3)-C(4) Linkage, From the Heartwood of Acacia nigrescens. Chem. Nat. Compd. 43, 533-538.
709	Gallocatechin-(4'→O→7)-epigallocatechin	Bruyne, T., Cimanga, K., Pieters, L., Claeys, M., Dommisse, R., Vlietinck, A. (1997). Gallocatechin-(4'→O→7)-epigallocatechin, A New Biflavonoid Isolated from Bridelia ferruginea. Nat. Prod. Lett. 11, 47-52.
711	(2R,3S)-4',5,7-tri-O-methylnaringenin-(3α→5)-(2R)-2,4,4',6-tetra-O-methylmaesopsin	Bekker, R., Brandt, E., Ferreira, D. (1999). Biflavonoids. Part 4. Structure and Stereochemistry of Novel Flavanone- and the First Isoflavanone-benzofuranone Biflavonoids. Tetrahedron 55, 10005-10012.
712	(2R,3S)-4',5,7-tri-O-methylnaringenin-(3α→5)-(2S)-2,4,4',6-tetra-O-methylmaesopsin	Bekker, R., Brandt, E., Ferreira, D. (1999). Biflavonoids. Part 4. Structure and Stereochemistry of Novel Flavanone- and the First Isoflavanone-benzofuranone Biflavonoids. Tetrahedron 55, 10005-10012.
713	(2S,3R)-4',5,7-tri-O-methyldihydrogenistein-(2α→7)-(2R)-2,4,4',6-tetra-O-methylmaesopsin	Bekker, R., Brandt, E., Ferreira, D. (1999). Biflavonoids. Part 4. Structure and Stereochemistry of Novel Flavanone- and the First Isoflavanone-benzofuranone Biflavonoids. Tetrahedron 55, 10005-10012.
714	(2S,3R)-4',5,7-tri-O-methyldihydrogenistein-(2α→7)-(2S)-2,4,4',6-tetra-O-methylmaesopsin	Bekker, R., Brandt, E., Ferreira, D. (1999). Biflavonoids. Part 4. Structure and Stereochemistry of Novel Flavanone- and the First Isoflavanone-benzofuranone Biflavonoids. Tetrahedron 55, 10005-10012.
715	Lophirone K	Messanga, B., Tih, R., Sondengam, B., Martin, M., Bodo, B. (1994). Biflavonoids from Ochna calodendron. Phytochemistry 35, 791-794.
716	Calodenin A	Messanga, B., Tih, R., Sondengam, B., Martin, M., Bodo, B. (1994). Biflavonoids from Ochna calodendron. Phytochemistry 35, 791-794.
717	Calodenin B	Messanga, B., Tih, R., Sondengam, B., Martin, M., Bodo, B. (1994). Biflavonoids from Ochna calodendron. Phytochemistry 35, 791-794.
718	Bartramiaflavone tautomer I	Seeger, T., Geiger, H., Zinsmeister, H. (1991). Bartramiaflavone, A Macrocyclic Biflavonoid from the Moss Bartramia pomiformis. Phytochemistry 30, 1653-1656.
719	Bartramiaflavone tautomer II	Seeger, T., Geiger, H., Zinsmeister, H. (1991). Bartramiaflavone, A Macrocyclic Biflavonoid from the Moss Bartramia pomiformis. Phytochemistry 30, 1653-1656.
721	2'',3''-Dihydroochnaflavone	de Oliveira, M., de Carvalho, M., da Silva, C., Werle, A. (2002). New Biflavonoid and Other Constituents from Luxemburgia nobilis (EICHL). J. Braz. Chem. Soc. 13, 119-123.
722	4',7-Dimethoxy-5-hydroxyflavone-(3'-O-4''')-7"-methoxy-5"-hydroxyflavanone	de Oliveira, M., de Carvalho, M., da Silva, C., Werle, A. (2002). New Biflavonoid and Other Constituents from Luxemburgia nobilis (EICHL). J. Braz. Chem. Soc. 13, 119-123.
724	(2S,7aS,13aR)-2,7a-bis(4-Acetoxyphenyl)-13-oxo-3,4-dihydro-2H,13H-furo[2,3-b:5,4-h']dichromene-5,10,12,13a(7aH)-tetrayl tetraacetate	Baba, K., Yoshikawa, M., Taniguchi, M., Kozawa, M. (1995). Biflavonoids from Daphne odora. Phytochemistry 38, 1021-1026.
725	(2S,7aS,13aR)-13a-Hydroxy-5,10,12-trimethoxy-2,7a-bis(4-methoxyphenyl)-3,4,7a,13a-tetrahydro-2H,13H-furo[2,3-b:5,4-h']dichromen-13-one	Baba, K., Yoshikawa, M., Taniguchi, M., Kozawa, M. (1995). Biflavonoids from Daphne odora. Phytochemistry 38, 1021-1026.
726	Permethyldaphnodorin F	Baba, K., Yoshikawa, M., Taniguchi, M., Kozawa, M. (1995). Biflavonoids from Daphne odora. Phytochemistry 38, 1021-1026.
727	(2S,7aR,13aS)-2,7a-bis(4-Acetoxyphenyl)-13-oxo-3,4-dihydro-2H,13H-furo[2,3-b:5,4-h']dichromene-5,10,12,13a(7aH)-tetrayl tetraacetate	Baba, K., Yoshikawa, M., Taniguchi, M., Kozawa, M. (1995). Biflavonoids from Daphne odora. Phytochemistry 38, 1021-1026.
728	(2S,7aR,13aS)-13aHydroxy-5,10,12-trimethoxy-2,7a-bis(4-methoxyphenyl)-3,4,7a,13a-tetrahydro-2H,13H-furo[2,3-b:5,4-h']dichromen-13-one	Baba, K., Yoshikawa, M., Taniguchi, M., Kozawa, M. (1995). Biflavonoids from Daphne odora. Phytochemistry 38, 1021-1026.
729	(2S,7aR,13aS)-5,10,12,13a-Tetramethoxy-2,7a-bis(4-methoxyphenyl)-3,4,7a,13a-tetrahydro-2H,13H-furo[2,3-b:5,4-h']dichromen-13-one	Baba, K., Yoshikawa, M., Taniguchi, M., Kozawa, M. (1995). Biflavonoids from Daphne odora. Phytochemistry 38, 1021-1026.
730	(2S,7aS,13S,13aS)-5,10,12-Trimethoxy-2,7a-bis(4-methoxyphenyl)-3,4-dihydro-2H,13H-furo[2,3-b:5,4-h']dichromene-13,13a(7aH)-diol	Baba, K., Yoshikawa, M., Taniguchi, M., Kozawa, M. (1995). Biflavonoids from Daphne odora. Phytochemistry 38, 1021-1026.
731	(2S,7aS,13R,13aS)-5,10,12-Trimethoxy-2,7a-bis(4-methoxyphenyl)-3,4-dihydro-2H,13H-furo[2,3-b:5,4-h']dichromene-13,13a(7aH)-diol	Baba, K., Yoshikawa, M., Taniguchi, M., Kozawa, M. (1995). Biflavonoids from Daphne odora. Phytochemistry 38, 1021-1026.
732	Genkwanol C	Baba, K., Taniguchi, M., Kozawa, M. (1993). A Third Spirobiflavonoid Genkwanol C From Daphne genkwa. Phytochemistry 33, 913-916.
733	Wikstrol A	Baba, K., Taniguchi, M., Kozawa, M. (1994). Three Biflavonoids From Wikstroemia sikokiana. Phytochemistry 37, 879-883.
734	Wikstrol B	Baba, K., Taniguchi, M., Kozawa, M. (1994). Three Biflavonoids From Wikstroemia sikokiana. Phytochemistry 37, 879-883.
735	5,5",7,7",3',4',4'''-Heptahydroxy-[3,8"]-flavanonylflavone	Babu, V., Ali, S., Sultana, S., Ilyas, M. (1988). A Biflavonoid From Garcinia nervosa. Phytochemistry 27, 3332-3335.
736	2,3-Dihydrodicranolomin	Markham, K., Andersen, O., Viotto, E. (1988). Unique Biflavonoid Types From The Moss Dicranoloma robustum. Phytochemistry 27, 1745-1749.; Rampendahl, C., Seeger, T., Geiger, H., Zinsmeister, H. (1996). The Biflavonoids of Plagiomnium undulatum. Phytochemistry 41, 1621-1624.
737	2",3"-Dihydro-5',6"-biluteolin	Markham, K., Andersen, O., Viotto, E. (1988). Unique Biflavonoid Types From The Moss Dicranoloma robustum. Phytochemistry 27, 1745-1749.
738	7-O-Methylamentoflavone	Markham, K., Franke, A., Molloy, B., Webby, R. (1990). Flavonoid Profiles of New Zealand Libocedrus And Related Genera. Phytochemistry 29, 501-507.
739	7-O-Methyl-2,3-dihydroamentoflavone	Markham, K., Franke, A., Molloy, B., Webby, R. (1990). Flavonoid Profiles of New Zealand Libocedrus And Related Genera. Phytochemistry 29, 501-507.
740	3'''-Desoxydicranolomin	Rampendahl, C., Seeger, T., Geiger, H., Zinsmeister, H. (1996). The Biflavonoids of Plagiomnium undulatum. Phytochemistry 41, 1621-1624.
741	2,3-Dihydro-5'-hydroxyrobustaflavone	Rampendahl, C., Seeger, T., Geiger, H., Zinsmeister, H. (1996). The Biflavonoids of Plagiomnium undulatum. Phytochemistry 41, 1621-1624.
742	2,3-Dihydro-3'''-desoxydicranolomin	Rampendahl, C., Seeger, T., Geiger, H., Zinsmeister, H. (1996). The Biflavonoids of Plagiomnium undulatum. Phytochemistry 41, 1621-1624.
743	2,3-Dihydro-5'-3'''-dihydroxyrobustaflavone	Rampendahl, C., Seeger, T., Geiger, H., Zinsmeister, H. (1996). The Biflavonoids of Plagiomnium undulatum. Phytochemistry 41, 1621-1624.
744	3,3",5,5",7,7",4',4'''-Octahydroxy[2',2''']biflavone	Parveen, M., Ilyas, M., Mushfiq, M., Busudan, O., Muhaisen, H. (2004). A new Biflavonoid from Leaves of Garcinia Nervosa. Nat. Prod. Res. 18, 269-275.
745	Lophirone B	Tih, R., Sondengam, B., Martin, M., Bodo, B. (1989). Structure of Lophirones B and C, Biflavonoids From the Bark of Lophira lanceolata. Phytochemistry 28, 1557-1559.
